# Supplementary material for: CRISPR-StAR enables high-resolution genetic screening in complex in vivo models
Source: Springer Nature journal article supplement (doi:10.1038/s41587-024-02512-9), 2024-12-16
Supplement: MOESM21 [file 41587_2024_2512_MOESM21_ESM%20(1).xlsx]

## Sheet: Fig3_StAR
id	neg.lfc.invitro	minRRA.score.invitro	num.invitro	neg.lfc.invivo	minRRA.score.invivo	num.invivo
0610007P14Rik	0.28128	1.25897	15	0.6233	1.30113	9
0610009B22Rik	-0.14285	0.411056	15	0.89323	0.979846	6
0610009O20Rik	0.079685	0.953115	15	-0.078862	0.234287	6
0610010F05Rik	-0.015869	0.221082	15	-0.44813	0.303836	7
0610010K14Rik	0.20087	0.413638	15	-0.30135	0.7103	6
0610011F06Rik	0.078279	0.310833	15	-0.92701	1.07151	6
0610012G03Rik	0.3677	1.73852	15	0.11475	0.611899	5
0610030E20Rik	0.14619	0.624629	15	0.78516	0.939869	11
0610040J01Rik	-0.065846	0.359847	15	0.61306	0.371509	4
1110001J03Rik	0.44658	1.73154	15	-0.32153	0.441231	6
1110002E22Rik	0.17955	0.386824	15	0.24407	1.16292	8
1110004E09Rik	-0.80815	3.1917	15	-4.4094	2.93282	5
1110007C09Rik	0.04175	0.207699	15	-0.46725	2.42826	7
1110008F13Rik	0.096134	0.152415	15	0.34027	0.673459	9
1110008L16Rik	-0.29436	1.13194	15	-0.65717	0.698081	5
1110008P14Rik	0.085854	0.908157	15	1.0238	1.67809	3
1110012L19Rik	0.19237	0.534558	15	-0.53574	0.712355	14
1110017D15Rik	0.32121	1.26875	15	-0.46038	0.341903	8
1110025L11Rik	-0.21189	0.615808	15	-0.2252	0.879393	8
1110032A03Rik	-0.17295	0.326988	15	-0.43948	1.01655	11
1110032F04Rik	0.20833	0.877588	15	1.9491	1.93044	6
1110034G24Rik	0.11054	0.637631	15	0.73213	0.962335	10
1110037F02Rik	-1.3615	8.11711	15	0.75964	0.724758	7
1110038F14Rik	-0.020367	0.872086	15	0.082234	0.600378	8
1110051M20Rik	-0.072551	0.580275	15	0.64251	0.719877	9
1110059E24Rik	0.065551	0.453063	15	-0.49549	1.10717	5
1110059G10Rik	0.4064	1.42332	15	-0.31136	1.23365	7
1110065P20Rik	0.31377	0.979805	15	-0.45314	1.02293	6
1190002N15Rik	0.05664	1.36269	15	0.12331	1.89911	13
1190003K10Rik	0.27235	0.532866	15	-0.05115	0.282921	6
1190005I06Rik	0.20097	0.679459	15	1.2402	1.55273	7
1190007I07Rik	-0.40034	2.53106	15	0.010443	2.52239	10
1200014J11Rik	-0.12369	0.535108	15	1.2427	0.86053	3
1300017J02Rik	0.090696	0.296244	15	-0.39776	0.657321	4
1500009C09Rik	0.023811	0.407257	15	0.11894	2.35939	4
1500009L16Rik	0.08134	0.648687	15	0.33674	0.595628	11
1500011B03Rik	0.118	1.25022	15	1.5291	2.02571	8
1500012F01Rik	0.096	0.52311	15	-0.57185	0.55505	6
1500015O10Rik	0.12811	1.78005	15	1.4981	1.66144	7
1600002H07Rik	0.12228	0.634344	15	0.3808	1.26664	7
1600002K03Rik	-0.048192	0.617461	15	0.42392	0.237577	3
1600012H06Rik	0.097802	2.79301	15	-0.81119	1.0647	7
1600014C10Rik	0.71143	4.73346	15	1.5004	1.37502	7
1600014C23Rik	0.13936	0.852942	15	1.3935	1.76825	5
1600014K23Rik	0.36252	1.38062	15	0.62773	3.76314	28
1600015I10Rik	-0.1337	0.902222	15	-0.4903	0.709587	9
1600023N17Rik	-0.0019176	0.770446	15	-0.13502	0.405	3
1600029O15Rik	0.18552	1.36188	15	0.54098	0.35085	7
1700001C02Rik	-0.19989	0.537452	15	1.3023	2.22532	10
1700001C19Rik	-0.17069	0.503749	15	-0.55681	0.705865	7
1700001F09Rik	-0.87679	3.06972	15	-3.2352	4.69282	8
1700001G17Rik	-0.04595	0.538022	15	0.021413	0.954834	3
1700001J03Rik	0.79519	3.97025	15	-0.49008	0.884389	3
1700001J11Rik	0.26214	1.07983	15	0.1846	1.41782	8
1700001L19Rik	-0.059913	0.524067	15	0.7859	1.38442	7
1700001O22Rik	0.016757	1.07038	15	-0.33162	1.17822	9
1700003E16Rik	0.010682	0.426838	15	-0.41857	0.533577	8
1700003F12Rik	0.18015	0.717967	15	0.93645	0.902084	7
1700003H04Rik	0.41511	2.33618	15	0.55959	1.40074	4
1700003M02Rik	0.37996	2.15018	15	0.50281	0.46482	4
1700006A11Rik	-0.023624	0.896367	15	0.18323	0.870085	8
1700006E09Rik	0.080955	0.408546	15	0.26216	0.429165	7
1700007B14Rik	0.03071	0.121237	15	-0.23595	0.609736	12
1700007G11Rik	0.20222	0.168649	15	0.22526	0.533399	4
1700007K09Rik	-0.088435	0.944278	15	-1.1714	1.14132	7
1700007K13Rik	-0.01592	0.259448	15	0.56578	0.983761	7
1700008F21Rik	0.069733	0.595423	15	-0.20229	0.918365	6
1700008I05Rik	0.55089	2.20356	15	0.82048	1.16197	12
1700008O03Rik	0.063966	0.6286	15	-0.029769	0.346324	4
1700008P02Rik	0.025197	0.590304	15	0.53177	0.793498	7
1700009N14Rik	0.038194	0.202497	15	1.1124	1.07748	6
1700010B08Rik	-0.014753	0.238433	15	0.55477	0.566566	9
1700010I14Rik	0.044242	0.367847	15	-0.12505	0.487489	5
1700010N08Rik	-0.41257	1.64239	15	0.88912	0.98826	6
1700011A15Rik	0.44971	2.49235	15	0.87183	0.616005	3
1700011E24Rik	-0.244	1.0212	15	-0.95713	1.99572	8
1700011H14Rik	0.17833	0.328586	15	0.80502	1.0714	8
1700011I03Rik	0.14636	0.583692	15	0.33919	0.787014	7
1700011L22Rik	-0.19056	0.243227	15	0.6952	0.776348	9
1700011M02Rik	-0.32481	1.50947	12	0.28336	1.03829	9
1700012A03Rik	-0.0052226	0.473092	15	0.033009	0.738238	7
1700012B07Rik	-0.090683	0.522517	15	0.15333	0.341207	4
1700012B09Rik	-0.12823	0.357912	15	0.27237	4.01109	23
1700012L04Rik	-0.42666	0.889713	15	-0.2028	0.955931	9
1700012P22Rik	0.10527	0.326288	15	0.42753	0.560715	5
1700013D24Rik	0.40136	1.90466	15	-0.2505	0.241361	6
1700013G24Rik	0.11111	1.04161	15	0.47306	0.711214	4
1700013H16Rik	-0.093172	0.63748	15	1.0443	1.04139	6
1700015E13Rik	0.012027	0.708742	15	0.23086	0.14685	3
1700015F17Rik	-0.1337	0.494606	15	0.60793	0.962255	3
1700015G11Rik	0.11821	0.247038	15	2.253	3.35564	12
1700016A09Rik	0.1816	1.22339	15	-0.098041	0.849458	8
1700016C15Rik	0.33751	1.90379	15	1.2451	1.42467	6
1700016H13Rik	0.2582	0.705269	15	0.51483	0.54604	7
1700016K19Rik	0.13476	0.368363	15	2.2941	2.68523	6
1700017B05Rik	-0.12034	0.33336	15	-0.19104	0.29979	5
1700017D01Rik	0.10691	0.477334	15	0.69986	0.928044	10
1700017N19Rik	0.18166	0.518902	15	0.40059	0.584126	4
1700018B08Rik	0.17155	0.587607	15	0.29503	0.804931	5
1700018C11Rik	0.0009639	0.552656	15	0.39995	0.441088	6
1700018F24Rik	-0.32465	0.946537	15	-2.101	1.3169	4
1700018G05Rik	-0.052919	0.599065	15	0.48683	1.635	9
1700019A02Rik	0.047848	0.327311	15	1.5981	1.72839	6
1700019B03Rik	0.14151	0.322138	15	-1.4988	1.41488	4
1700019D03Rik	0.087768	0.737668	15	0.073614	0.470531	5
1700019G17Rik	-0.048072	0.158271	15	1.3833	1.25062	7
1700019L03Rik	-0.054936	0.222276	15	-1.2071	1.47949	9
1700019M22Rik	0.24277	0.933264	15	0.59458	0.481131	6
1700019N19Rik	0.33815	1.57905	15	1.0354	1.7536	8
1700019O17Rik	-0.12945	0.148944	15	1.0805	1.08266	7
1700020A23Rik	0.28912	1.37111	15	-0.46321	0.368952	8
1700020D05Rik	0.10453	0.052238	15	0.36226	0.439806	7
1700020L24Rik	-0.16086	0.812959	15	0.7494	0.732805	7
1700020N01Rik	0.11999	0.960269	15	2.2587	2.29091	5
1700020N15Rik	0.15688	0.624446	15	-0.48922	0.995636	6
1700021F05Rik	-0.034058	0.567656	15	-0.14712	0.358923	6
1700021F07Rik	0.44156	2.18015	15	1.626	1.69547	5
1700021K19Rik	0.14447	2.34086	15	0.54003	1.25855	9
1700022A21Rik	-0.10477	0.297509	15	0.20586	0.602581	8
1700022I11Rik	-0.00061277	0.656178	15	1.1619	1.67168	8
1700023E05Rik	-0.064545	0.36943	15	1.6073	1.67052	7
1700023F06Rik	0.28955	1.35234	15	1.274	1.57157	4
1700024G13Rik	0.073462	0.1852	15	-0.0085964	0.144051	5
1700024P04Rik	0.39659	1.30268	15	1.1992	1.18699	4
1700024P16Rik	0.16522	0.389372	15	0.33571	0.830708	9
1700025B11Rik	-0.26588	0.984054	15	0.93823	1.63624	10
1700025C18Rik	0.15837	0.760801	15	0.7168	1.02895	10
1700025F22Rik	0.12635	0.390769	15	0.38762	0.520569	8
1700026D08Rik	0.21461	0.620676	15	0.47646	0.475383	3
1700026L06Rik	-0.53526	2.09724	15	0.092069	0.407424	7
1700028B04Rik	-0.097656	0.0782407	15	0.096339	1.07058	9
1700028J19Rik	0.18581	0.868413	15	0.18807	0.579434	4
1700028K03Rik	-0.10643	1.08444	15	-0.066684	1.93464	8
1700028P14Rik	0.24711	1.69319	15	0.027397	0.43024	8
1700029F12Rik	0.3198	1.89405	15	1.4833	1.97139	10
1700029H14Rik	0.10278	0.391677	15	0.32282	0.16298	3
1700029I15Rik	0.065508	1.0931	15	-0.52326	1.52424	11
1700029P11Rik	0.49273	1.89815	15	-0.029267	0.414946	6
1700030F18Rik	-0.090594	1.39359	15	0.59248	0.654136	6
1700030K09Rik	0.006261	0.308795	15	0.26033	0.945693	5
1700031F05Rik	-0.51731	2.17802	15	-0.32395	2.20878	6
1700031L13Rik	0.26118	0.76427	15	0.034365	0.10559	11
1700031M16Rik	0.13489	0.550954	15	-0.030139	0.555596	7
1700034E13Rik	0.32326	0.864645	15	0.073193	0.670724	9
1700034I23Rik	-0.096913	0.734875	15	0.183	1.22439	10
1700034J05Rik	-0.32095	0.873576	15	0.26726	1.02373	10
1700034O15Rik	0.096581	0.621857	15	0.58769	1.77374	11
1700037C18Rik	-0.08156	0.499174	15	0.095992	0.957543	9
1700037H04Rik	0.22582	0.326141	15	-0.34233	0.438863	8
1700039E15Rik	0.33639	2.56508	15	1.3492	2.34848	5
1700040L02Rik	0.1541	0.731703	15	0.79391	0.823301	5
1700042B14Rik	0.082412	0.167389	15	-0.05535	1.03803	5
1700042G07Rik	0.43404	2.09586	15	-0.080545	0.68628	7
1700049E17Rik1	0.078492	1.18023	15	1.1327	3.46587	12
1700049E17Rik2	-1.3725	3.59977	15	-3.2627	2.82269	6
1700049G17Rik	0.34793	1.2195	15	0.43266	1.62215	7
1700049L16Rik	-0.11058	0.677078	15	0.084117	0.126435	4
1700055N04Rik	0.24247	1.12041	15	-0.04085	1.56041	8
1700056E22Rik	0.085114	0.565447	15	-1.8797	1.7536	4
1700057G04Rik	0.13798	0.750435	15	1.8993	2.27128	9
1700061G19Rik	-0.0050728	0.624666	15	0.41716	1.51323	7
1700065D16Rik	0.25235	0.698666	15	-0.81277	0.94962	4
1700066B19Rik	-0.12023	0.646738	15	0.55228	1.6137	8
1700066M21Rik	-0.10139	1.06859	15	-1.3774	1.30057	6
1700067K01Rik	-0.1451	0.76708	15	0.7789	0.650082	3
1700067P10Rik	0.56245	2.6088	15	0.68174	1.09465	9
1700069L16Rik	0.18804	0.90025	15	0.55695	0.924891	10
1700071K01Rik	0.016185	0.0566786	15	0.52248	0.679148	6
1700073E17Rik	0.24171	0.66356	15	0.66102	1.47722	14
1700074P13Rik	0.50689	1.70635	15	0.75642	1.03634	8
1700080E11Rik	0.37612	1.72633	15	0.21047	0.887127	10
1700080O16Rik	-0.17946	0.802389	15	0.6458	1.22997	4
1700084C01Rik	0.1107	0.612842	15	1.3763	1.45398	4
1700084J12Rik	0.29081	1.31561	15	0.46549	0.558164	6
1700084M14Rik	0.097306	1.14159	15	0.25448	1.07151	6
1700086L19Rik	0.48231	2.7215	15	-0.13244	0.677119	9
1700088E04Rik	-0.092678	0.604342	15	1.3916	1.18762	6
1700091H14Rik	-0.79903	2.55959	15	-1.114	0.756739	3
1700092M07Rik	0.14247	0.300223	15	0.67294	0.816987	5
1700093K21Rik	0.16403	1.17814	15	0.5079	1.1971	3
1700094D03Rik	-0.17916	0.241474	15	0.65649	1.25022	15
1700101E01Rik	0.20724	0.888637	15	-0.13244	0.312551	3
1700102P08Rik	-0.014338	0.869698	15	-0.097568	1.0168	7
1700106J16Rik	-0.14417	0.822781	15	2.9295	1.54055	3
1700109H08Rik	0.25034	1.02687	15	1.3381	1.24342	5
1700112E06Rik	0.26497	1.03674	15	-0.21663	0.431728	6
1700113H08Rik	-0.12119	0.732312	15	-1.0442	1.34212	6
1700122O11Rik	0.14247	2.45541	15	0.37922	0.6574	9
1700123I01Rik	0.2747	0.528415	15	-0.94616	1.06882	4
1700123K08Rik	-0.00056894	0.864645	15	-0.39732	0.769474	4
1700123L14Rik	-0.05483	0.283321	15	0.49735	0.899388	5
1700123O20Rik	0.29604	1.67545	15	0.66221	1.69607	6
1700125H20Rik	-0.27103	1.20598	15	-0.30843	0.626334	7
1700128F08Rik	0.23753	0.799752	15	-0.060917	0.550846	6
1700129C05Rik	0.40043	1.63496	15	-0.062761	0.333941	6
1810009A15Rik	-0.064955	0.396001	15	-0.22249	0.838692	10
1810009J06Rik	-0.091379	0.641799	15	0.20136	0.286358	5
1810010H24Rik	0.037903	0.727741	15	1.0127	1.83381	4
1810011H11Rik	0.46128	2.54785	15	-1.7741	2.03259	8
1810011O10Rik	0.57863	2.1135	15	1.1379	1.72306	7
1810013L24Rik	0.4533	2.97856	15	2.2802	5.63997	13
1810020O05Rik	-0.030095	0.17827	15	0.85495	1.19162	6
1810022K09Rik	0.071853	0.174593	15	0.44268	1.0572	3
1810024B03Rik	0.35313	1.53447	15	1.6821	3.87025	23
1810026J23Rik	-2.603	12.4886	15	-2.9306	5.02413	10
1810030O07Rik	-0.0084253	0.778455	15	2.0846	2.94329	6
1810041L15Rik	-0.079957	0.665486	15	0.47507	0.848416	10
1810043G02Rik	0.013687	0.388521	15	0.30772	0.401439	7
1810043H04Rik	-0.044238	0.119621	15	0.13261	0.681373	10
1810046K07Rik	-0.13438	0.481631	15	-0.069301	0.391485	4
1810055G02Rik	-0.11051	0.573342	15	1.053	1.6933	4
1810058I24Rik	0.22485	2.42933	15	1.1646	1.35486	10
1810062G17Rik	0.35781	1.30699	15	-0.49008	0.188083	5
1810065E05Rik	-0.12017	0.189277	15	0.042715	0.73189	7
2010002M12Rik	0.020894	1.29509	15	0.18865	0.725958	25
2010003K11Rik	-0.055114	0.291537	15	-0.14798	1.07801	9
2010005H15Rik	0.19875	0.156163	15	0.88014	0.741315	4
2010010A06Rik	0.4655	1.88934	15	0.24171	0.199132	6
2010012O05Rik	0.19691	0.817414	15	-1.3356	1.35546	6
2010106E10Rik	0.51619	2.6735	15	0.61134	0.369715	4
2010107E04Rik	-0.31496	0.736009	15	-0.34487	0.682334	7
2010107G12Rik	-0.2399	0.726374	15	1.1577	1.37387	5
2010107G23Rik	0.21092	1.32956	15	0.21499	1.00617	4
2010109A12Rik	0.26821	0.878407	15	-0.072931	1.35533	5
2010109I03Rik	0.031158	0.295987	15	0.89569	0.965211	6
2010111I01Rik	-0.0025451	1.45253	15	-0.10404	1.44291	12
2010300C02Rik	0.1515	0.57723	15	0.058146	1.3612	10
2010315B03Rik	0.46327	1.89079	15	0.048473	0.299383	3
2200002D01Rik	0.15609	0.656355	15	1.8634	2.00225	6
2200002J24Rik	0.06781	0.192255	15	1.2144	2.21489	6
2210010C04Rik	0.24998	0.928892	15	0.089089	0.278115	3
2210011C24Rik	-0.22568	1.08585	15	0.24169	0.0786465	7
2210016F16Rik	-0.013279	0.300683	15	0.11993	0.246225	7
2210016L21Rik	-0.1725	0.832063	15	-0.56295	0.866429	4
2210018M11Rik	-0.44549	2.08159	15	-1.0563	1.15091	9
2210404O09Rik	0.10993	0.241754	15	1.3442	1.595	6
2210407C18Rik	0.25368	0.698666	15	0.27205	0.819272	7
2210408I21Rik	0.14841	1.43051	15	0.33958	0.222464	8
2210409E12Rik	-0.12803	0.306379	15	-0.71035	0.904203	11
2300002M23Rik	0.03252	1.31154	15	-0.47854	0.976336	9
2300003K06Rik	-0.17166	0.596519	15	0.40238	0.572157	8
2300005B03Rik	-0.12161	0.469455	15	-0.80059	1.27237	7
2300009A05Rik	0.075161	1.83983	15	0.31888	0.688755	8
2310002L09Rik	0.20618	0.621184	15	0.043384	0.0871087	4
2310003H01Rik	-0.42958	1.39244	15	-0.32006	0.926428	10
2310007B03Rik	0.28845	1.57333	15	0.44487	1.1379	10
2310007L24Rik	0.38715	2.1976	15	-0.63114	2.6106	9
2310009A05Rik	0.066719	0.439496	15	0.1508	0.687294	6
2310009B15Rik	-0.0054225	0.738119	15	0.34552	1.38663	10
2310011J03Rik	-0.89889	3.52366	15	-1.4934	1.6438	5
2310014L17Rik	-0.21099	0.727787	15	-1.0757	1.53114	3
2310022A10Rik	0.2231	0.955303	15	0.75964	1.30501	9
2310022B05Rik	0.15815	1.26003	15	0.1958	0.959912	11
2310030G06Rik	-0.069486	0.200225	15	0.20891	1.03645	12
2310033P09Rik	0.096514	0.390427	15	0.076492	0.549766	6
2310034C09Rik	0.078277	1.05809	15	0.70837	1.23279	8
2310034G01Rik	0.20405	0.746129	15	0.13261	0.274048	4
2310035C23Rik	0.050475	0.337913	15	-0.19798	0.309246	7
2310036O22Rik	-0.98314	7.57579	15	-0.85455	1.06037	6
2310039H08Rik	-0.15048	0.243813	15	-0.74049	0.986026	6
2310045N01Rik	0.30741	1.79877	15	0.46181	0.536256	6
2310047M10Rik	-0.30678	0.622293	15	0.058473	0.393307	6
2310050C09Rik	0.56577	2.23676	15	0.44797	1.42148	7
2310057J18Rik	0.13891	0.696826	15	0.31815	0.438791	6
2310057M21Rik	-0.36483	1.21627	15	0.2687	0.679438	7
2310057N15Rik	0.207	0.626573	15	0.24137	0.127628	5
2310061I04Rik	0.03516	0.40789	15	0.24192	0.456789	7
2310061N02Rik	-0.096187	0.190629	15	0.39161	0.999913	10
2310067B10Rik	0.18686	1.20431	15	-1.7075	2.73731	4
2310079G19Rik	0.22016	0.86135	15	0.46132	2.28125	16
2410002F23Rik	-0.25122	1.14692	15	-0.8914	1.00299	8
2410004B18Rik	0.22376	0.360225	15	0.45297	0.313891	5
2410004P03Rik	-0.19018	0.59098	15	0.60717	0.73431	6
2410012M07Rik	0.22764	1.09594	15	0.39817	0.861035	6
2410089E03Rik	-0.29825	1.95703	15	0.56657	0.582462	10
2410124H12Rik	0.0053765	0.403799	15	-0.60982	0.706439	5
2410127L17Rik	-0.23809	1.33901	15	0.31298	0.574042	7
2410131K14Rik	-1.8491	12.3713	15	-1.2707	1.82408	8
2410137M14Rik	0.28505	0.407168	15	0.25773	1.06383	8
2410141K09Rik	-0.69193	2.03506	15	-1.0905	3.43111	19
2510002D24Rik	0.44653	1.29886	15	0.0080252	1.42515	5
2510009E07Rik	-0.077306	0.114012	15	0.66952	0.94279	8
2510039O18Rik	0.020187	0.944278	15	-0.57012	1.5992	7
2610001J05Rik	0.26706	0.891536	15	0.68557	0.990252	15
2610002J02Rik	-0.33471	2.0925	15	-0.46227	1.00947	8
2610002M06Rik	0.28309	1.09796	15	0.51955	0.866429	4
2610008E11Rik	0.24307	0.665586	15	-0.074906	1.20377	11
2610015P09Rik	0.10326	0.664542	15	-0.16129	0.252293	6
2610020H08Rik	0.22622	0.949079	15	-0.67264	1.07089	16
2610021A01Rik	-0.060487	0.230099	12	2.2582	2.42206	6
2610024D14Rik	0.056491	0.918293	15	-0.63806	1.8308	12
2610028H24Rik	0.10424	0.953856	15	0.12643	0.457399	4
2610034B18Rik	0.37571	1.64262	15	0.87516	1.21945	8
2610042L04Rik	0.02186	1.94374	15	0.44239	1.15991	9
2610044O15Rik8	0.35088	1.14596	15	0.1986	0.0888957	3
2610301B20Rik	0.06011	0.857298	15	-0.4552	0.830561	9
2610305D13Rik	-0.29708	0.885556	15	0.11043	0.415816	4
2610318N02Rik	-0.103	0.245361	15	1.1528	1.21375	6
2610507B11Rik	-0.12348	0.638234	15	0.51189	0.422474	8
2610528A11Rik	0.13564	2.03657	15	0.72596	0.922196	9
2610528J11Rik	0.41514	2.7932	15	0.63011	1.4259	9
2700029M09Rik	-0.16359	0.502752	15	0.27904	0.651715	6
2700049A03Rik	-0.17153	0.184163	15	0.12135	0.874194	9
2700060E02Rik	-0.40069	2.16031	15	0.11644	0.429165	7
2700062C07Rik	-1.1674	5.76	15	0.025842	0.252705	6
2700081O15Rik	-0.20781	0.56854	15	0.17495	0.185633	7
2700089E24Rik	-0.0068503	1.31001	15	1.0881	2.48865	11
2700094K13Rik	0.39515	2.16067	15	0.29589	0.315038	8
2700097O09Rik	0.30903	1.05943	15	-0.95996	1.03317	6
2810004N23Rik	-2.5419	10.2079	15	-0.29333	0.741794	6
2810006K23Rik	0.0082299	0.490287	15	0.48256	0.288159	3
2810007J24Rik	-0.095944	0.564984	15	0.18722	1.06217	6
2810021J22Rik	-0.23074	1.15889	15	-0.17117	0.581434	7
2810025M15Rik	0.0008118	0.474372	15	0.55526	1.26056	7
2810039B14Rik	0.32683	1.24194	15	-0.22607	0.0806394	5
2810403A07Rik	-0.23463	1.05223	15	0.23932	0.527785	8
2810405F15Rik	0.093345	0.394296	15	0.81665	0.872183	9
2810408A11Rik	0.015594	0.140477	15	0.21138	0.589746	6
2810408M09Rik	-0.22096	5.12511	15	0.20411	2.10788	9
2810417H13Rik	-0.79301	4.02576	15	0.32444	0.410229	7
2810428I15Rik	-0.013027	0.179175	15	-0.13502	0.8189	11
2810459M11Rik	-0.60856	1.93644	15	-0.40935	0.603278	8
2810474O19Rik	0.16574	0.396542	15	-0.15554	0.54005	12
2900011O08Rik	0.20991	1.23218	15	1.6163	1.46864	7
2900026A02Rik	0.20851	0.392781	15	0.92965	1.16888	6
2900092C05Rik	-0.14376	2.18881	15	-0.0063901	0.123263	4
3000002C10Rik	0.16292	0.331232	15	0.65338	0.527682	3
3010026O09Rik	-0.17297	1.30256	15	0.45129	1.18204	9
3110001I22Rik	-0.012558	0.457249	15	-1.8553	1.89093	6
3110002H16Rik	0.43701	2.89856	15	-0.34722	0.190285	4
3110007F17Rik	-0.30754	1.15295	15	-0.40648	0.805264	10
3110009E18Rik	-0.083012	0.41024	15	-1.4332	0.912574	3
3110040M04Rik	-0.62844	3.44075	15	-0.071385	0.703818	6
3110040N11Rik	0.1068	0.532466	15	-0.79732	1.35869	7
3110043O21Rik	0.2779	1.76965	15	-0.40845	0.850658	10
3110052M02Rik	0.16073	0.172346	15	1.7854	2.29595	8
3110057O12Rik	0.43088	1.88213	15	-0.31468	1.24139	13
3110062M04Rik	-0.05272	0.692504	15	3.4514	3.2163	4
3110079O15Rik	-0.21033	1.42193	15	-0.83942	1.50166	7
3110082I17Rik	-0.041354	0.538877	15	0.87349	0.903229	5
3110082J24Rik	0.22459	0.834785	15	-1.0566	2.15154	9
3300002I08Rik	0.06129	1.01685	15	0.92208	1.77446	11
3425401B19Rik	0.12786	1.14939	15	0.56248	1.01032	6
3632451O06Rik	0.14534	1.29701	15	0.17928	0.514435	7
3830403N18Rik	0.63931	1.79239	15	0.55879	0.701649	5
3830406C13Rik	0.0053118	0.979722	15	1.4249	0.913533	3
3830417A13Rik	-0.031643	1.02391	15	-0.56109	1.45638	12
43893	0.078333	0.573456	15	0.0075795	0.207286	12
43894	0.094168	1.25155	15	-0.020427	0.374739	10
43895	-0.040993	0.205442	15	0.41489	0.751046	7
43896	0.10869	0.574401	15	-0.624	0.706063	5
43897	0.25368	1.32488	15	0.4588	0.600153	8
43898	-0.018616	0.390278	15	0.736	0.809108	6
43899	-0.33172	1.77245	15	-1.3867	1.57759	5
43900	0.27666	2.1321	15	-1.1139	1.35793	3
43901	0.38662	1.92716	15	0.53738	0.976048	7
44075	0.11055	0.559815	15	-1.2288	1.03336	3
44076	-0.19884	0.840944	15	-0.085005	0.786695	17
44077	0.32936	1.94904	15	-0.88888	1.15278	5
44078	0.065082	0.959002	15	-0.52193	0.802086	12
44079	-0.12375	0.515643	15	0.75216	1.15379	6
44080	0.34319	1.8912	15	-0.062095	0.117413	4
44081	-1.7223	6.69652	15	-2.0267	2.28248	8
44082	0.050306	0.737193	15	0.076835	0.193108	6
44083	-0.034911	0.143362	15	-2.1164	1.5082	4
44084	0.28165	2.64367	15	0.11727	0.58316	7
44085	-0.0615	0.957661	15	1.8823	1.17239	3
44086	0.08797	0.56949	15	0.49183	0.685838	6
44088	0.16002	0.389297	15	-0.71483	1.02625	10
44089	0.33066	1.09852	15	-0.17587	0.317241	8
4430402I18Rik	-0.011769	0.374832	15	0.064844	0.33236	6
4632428N05Rik	0.34057	1.55625	15	-0.57047	0.618542	5
4732416N19Rik	0.45696	1.33849	15	0.4751	1.05917	7
4732456N10Rik	-0.24651	0.737596	15	0.86054	0.915602	7
4833420G17Rik	0.16127	0.355246	15	0.35086	0.392652	5
4833423E24Rik	0.080388	0.115386	15	-2.0822	1.82527	7
4833427G06Rik	0.29228	1.94336	15	-0.29526	0.457361	7
4833439L19Rik	-0.35819	1.8197	15	0.0052615	1.33031	16
4921501E09Rik	-0.038525	0.396152	15	0.10658	1.17524	8
4921504E06Rik	0.044207	0.392416	15	-0.054755	0.63797	7
4921506M07Rik	0.23741	0.97453	15	0.8729	0.767766	5
4921507P07Rik	-0.13229	0.24657	15	2.4595	2.20211	4
4921509C19Rik	0.54267	2.58658	15	0.78818	1.38879	8
4921511C20Rik	0.18594	0.937945	15	1.3361	1.44949	8
4921511H03Rik	-0.010982	0.810454	15	0.75463	1.11659	8
4921513H07Rik	0.021164	0.692119	15	0.056724	0.473351	6
4921517D22Rik	0.00061542	0.283037	15	0.5884	0.542845	6
4921524J17Rik	-0.15135	0.49313	15	-1.178	1.13663	7
4921524L21Rik	-0.16842	0.356646	15	-0.65225	0.706284	8
4921530L21Rik	0.075974	1.1436	15	0.38962	0.732852	6
4921533I20Rik	-0.11318	0.504747	15	0.55231	1.08066	6
4921536K21Rik	-0.016865	0.631806	15	0.67105	0.606039	8
4921539E11Rik	0.37742	1.62663	15	0.50616	0.360743	5
4922502D21Rik	-0.013763	0.660747	15	0.18558	0.894524	5
4930402F06Rik	0.11618	0.165535	15	1.2549	2.63406	8
4930402H24Rik	0.12971	1.46911	15	0.54828	0.778481	12
4930402K13Rik	0.37412	1.8827	15	0.42668	1.33035	4
4930404N11Rik	0.022649	0.705005	15	-0.30295	0.694111	13
4930407I10Rik	-0.29518	1.34979	15	1.055	0.965652	7
4930412D23Rik	0.1249	0.599427	15	-0.098533	0.0516457	4
4930412O13Rik	0.26541	0.533414	15	0.84686	1.4225	12
4930413G21Rik	0.33881	1.40982	15	2.3182	1.90752	4
4930415F15Rik	0.2444	0.838902	15	-0.1599	0.426502	5
4930415L06Rik	0.15124	1.47428	15	1.1326	1.47079	8
4930415O20Rik	0.18177	0.586969	15	0.41787	0.516527	6
4930426D05Rik	-0.10853	0.891097	15	-0.73894	1.63002	11
4930427A07Rik	0.24308	0.617893	15	0.0039395	0.619373	10
4930428D18Rik	0.22696	0.63848	15	1.5158	1.98894	9
4930430A15Rik	0.14262	1.16719	15	-1.128	1.94539	4
4930430F08Rik	0.023972	0.949852	15	-0.3312	0.482685	4
4930431P22Rik	0.46228	3.28122	15	0.31568	1.16399	11
4930432K21Rik	-0.086316	0.690178	15	0.3896	0.150212	4
4930432M17Rik	-0.093408	0.260744	15	1.58	1.2296	4
4930433I11Rik	-0.59123	1.90763	15	0.52127	1.45629	4
4930435E12Rik	-0.25662	0.735277	15	1.7514	1.33852	5
4930444P10Rik	0.11572	0.460811	15	-0.07406	0.3651	9
4930447A16Rik	0.39801	1.70165	15	0.1246	0.367603	13
4930447C04Rik	0.6926	2.71368	15	1.0811	1.2942	6
4930448K20Rik	-0.24704	0.725334	15	0.31319	0.845515	4
4930449I24Rik	-0.47883	2.2919	15	0.65997	0.846551	4
4930451G09Rik	-0.46182	2.82295	15	0.42333	0.349459	7
4930451I11Rik	0.31431	2.06148	15	0.043929	0.5356	6
4930452B06Rik	-0.133	0.492819	15	-0.24413	0.107599	3
4930453H23Rik	0.11284	0.96839	15	0.41541	1.51231	10
4930453N24Rik	-0.50596	3.75343	15	-2.2843	1.9114	4
4930455H04Rik	0.29103	0.970616	15	0.43306	0.693125	10
4930467E23Rik	-0.32704	1.10005	15	-0.2409	0.51272	6
4930468A15Rik	0.26587	0.889646	15	0.23104	0.611899	5
4930469G21Rik	0.15844	0.638971	15	0.59439	2.04759	9
4930469K13Rik	0.21501	0.273102	15	-0.58254	0.444748	4
4930470P17Rik	0.20326	0.66374	15	0.41957	0.302222	10
4930471M09Rik	0.25454	0.863406	15	-0.2778	0.515914	4
4930474N05Rik	0.36987	1.15782	15	0.72006	0.692119	5
4930480E11Rik	0.15204	0.155722	15	-0.35803	0.810313	3
4930486L24Rik	0.13476	0.170317	15	0.27746	1.27872	13
4930502E18Rik	0.06492	0.754241	15	2.0183	1.87273	7
4930503B20Rik	0.23395	1.6547	15	0.47937	0.344593	7
4930503E14Rik	-2.2229	6.13615	15	-2.1733	3.26986	6
4930503E24Rik	-0.071935	0.356172	15	-0.26263	0.723446	5
4930503H13Rik	0.30221	1.32611	15	1.1116	1.53119	13
4930503L19Rik	0.22574	1.14762	15	-0.60405	0.961777	10
4930504O13Rik	0.47149	1.63659	15	0.36722	0.233052	7
4930505A04Rik	0.21923	0.758827	15	-0.36993	0.527726	11
4930506M07Rik	0.086708	0.308963	15	0.44935	0.464212	4
4930512M02Rik	0.39841	1.34546	15	0.17901	0.439794	4
4930513O06Rik	0.18403	0.88867	15	0.33128	0.168111	3
4930515G16Rik	0.21909	0.398614	15	3.2236	2.58112	6
4930519F16Rik	0.15075	0.966054	15	-0.31982	0.685311	4
4930519G04Rik	-0.014243	0.673357	15	-0.87657	1.31915	8
4930522H14Rik	0.024615	0.539839	15	-1.3094	1.00654	4
4930522L14Rik	0.11748	0.39435	15	0.26379	1.09811	8
4930523C07Rik	0.34401	2.49863	15	0.32598	0.61847	10
4930524B15Rik	0.27085	1.48589	15	-0.13269	0.210363	9
4930524N10Rik	0.17333	0.655274	15	0.90029	0.874844	7
4930529C04Rik	-0.15005	0.308335	15	0.039189	0.659536	14
4930538K18Rik	-0.204	0.308927	15	-0.40407	0.844603	11
4930539E08Rik	0.27273	0.818843	15	0.44228	0.707899	8
4930544D05Rik	-0.071186	0.666936	15	1.1527	1.43578	8
4930548H24Rik	0.037472	0.33265	15	-0.44813	0.69884	13
4930549C01Rik	0.056617	0.434011	15	1.7446	2.31216	7
4930550C14Rik	0.12711	0.554941	15	-1.2895	1.03051	5
4930550L24Rik	0.11043	0.523081	15	0.58466	0.419257	4
4930555G01Rik	0.29141	1.15137	15	-0.31863	0.421533	8
4930555K19Rik	0.36321	3.63905	15	0.49797	0.550013	6
4930557A04Rik	0.58164	2.21173	15	1.2484	2.17385	13
4930558C23Rik	0.2445	1.98826	15	1.0196	2.13664	11
4930558K02Rik	0.020055	0.551309	15	1.4424	1.22532	5
4930562C15Rik	0.15648	0.157628	15	0.034692	0.44579	8
4930563D23Rik	-0.090885	0.216447	15	-0.19296	1.43967	5
4930563E22Rik	0.20495	1.12542	15	0.37384	2.11573	7
4930564B18Rik	0.32446	1.49241	15	-0.59915	0.615252	5
4930564C03Rik	0.20947	1.55374	15	-0.011597	1.01978	12
4930564D02Rik	0.51389	2.24649	15	0.28299	0.492887	6
4930567H17Rik	0.24177	1.3425	15	0.049015	0.647393	6
4930568D16Rik	0.19639	0.397647	15	0.54909	1.20997	8
4930571K23Rik	0.021663	0.191472	15	-0.04141	0.651715	6
4930577N17Rik	0.19139	0.964851	15	-0.16154	0.381042	8
4930578C19Rik	0.37924	2.26867	15	0.49057	0.414596	5
4930578G10Rik	-0.13889	0.991954	15	1.2943	2.37314	10
4930578I06Rik	0.015048	0.168354	15	1.1762	0.853314	4
4930579F01Rik	0.23374	0.472796	15	-1.0971	14.1826	91
4930579G24Rik	-0.035733	0.201764	15	-0.53867	0.732852	8
4930583I09Rik	0.27465	1.23756	15	1.6552	1.78439	5
4930590J08Rik	0.16051	1.53718	15	1.8066	2.44097	6
4930591A17Rik	0.18002	0.301647	15	0.18413	1.29884	6
4930594C11Rik	0.23833	0.582528	15	-1.3496	0.946537	3
4930595D18Rik	0.011345	0.88243	15	0.12571	0.382329	7
4930595M18Rik	0.11948	0.537572	15	-0.39317	0.530207	7
4930596D02Rik	-0.075785	1.02455	15	-0.3631	0.124279	7
4931400O07Rik	0.037138	0.197165	15	0.11446	0.222269	4
4931406B18Rik	0.12903	1.02667	15	0.56129	0.39111	6
4931406C07Rik	-0.098388	0.733275	15	-0.52204	0.471803	15
4931406P16Rik	-0.34248	2.18874	15	-0.93087	1.3932	8
4931408C20Rik	0.033866	0.117977	15	0.75183	0.649055	6
4931409K22Rik	0.00071974	0.281009	15	0.43132	0.586667	4
4931414P19Rik	0.17894	0.918905	15	1.2809	1.64394	10
4931422A03Rik	0.30471	1.3418	15	-0.37686	1.32934	13
4931423N10Rik	0.38394	1.8069	15	0.00070931	0.403975	9
4931428F04Rik	0.18024	0.453939	15	1.1218	2.18731	3
4931428L18Rik	-0.42253	1.32299	15	0.0087099	0.67158	5
4931429I11Rik	-0.063758	0.394081	15	-0.24413	0.624135	17
4931429L15Rik	-0.17763	1.03741	15	-0.88011	1.22552	7
4931431F19Rik	0.22282	0.343844	15	0.97589	0.885289	5
4931440F15Rik	0.17899	2.59989	15	0.55259	0.933711	24
4931440P22Rik	-0.12192	0.305474	15	1.365	1.60453	11
4932411E22Rik	-0.16716	0.447831	9	1.4131	1.13397	5
4932411N23Rik	0.21712	0.753649	15	0.92134	1.65797	7
4932414N04Rik	-0.05268	0.306264	15	0.043533	0.182798	3
4932415M13Rik	-0.22789	0.799615	15	-0.55627	0.402854	3
4932416K20Rik	-0.077948	0.279452	15	2.3747	2.41881	6
4932418E24Rik	-0.16662	0.555534	15	0.76371	0.872539	4
4932429P05Rik	0.41746	2.627	15	0.47872	1.2835	10
4932438A13Rik	0.09822	0.529472	15	-0.12363	0.181194	13
4932438H23Rik	0.065551	0.370305	15	-0.1082	0.598117	11
4932443I19Rik	0.13543	0.946768	15	-1.4787	3.09573	7
4933400A11Rik	0.097229	0.149752	15	0.86688	1.53769	10
4933401B06Rik	0.30489	1.36163	15	0.04978	0.407523	8
4933402D24Rik	-0.048245	1.29873	15	-0.59834	0.757334	8
4933402E13Rik	-0.056465	0.633222	15	-0.19474	0.367158	8
4933402J07Rik	-0.20549	0.518844	15	1.7437	1.6777	4
4933402N03Rik	-0.051995	1.11928	15	-2.3179	2.49444	7
4933402N22Rik	-2.0255	5.80651	15	-2.6794	2.24106	7
4933402P03Rik	-0.07199	1.28829	15	0.63792	0.946883	8
4933405L10Rik	-0.14684	0.485187	15	-1.0583	0.944889	4
4933405O20Rik	-0.13095	0.882596	15	-1.784	2.29784	5
4933406J08Rik	0.012034	0.747584	15	1.2774	1.01508	4
4933406M09Rik	0.3091	1.097	15	-0.2667	0.963611	13
4933407L21Rik	0.02316	0.372685	15	-0.268	0.669708	8
4933408B17Rik	0.04733	0.517198	15	0.51332	0.573277	5
4933409G03Rik	0.15723	0.396509	15	1.0691	1.60628	6
4933409K07Rik	-0.54555	2.35989	15	-0.40792	1.0569	10
4933411G11Rik	0.24992	0.939869	15	0.88458	0.620024	3
4933411K16Rik	0.13463	0.577771	15	0.83754	1.38216	7
4933412E24Rik	0.31095	0.896333	15	-1.3995	1.49424	6
4933413G19Rik	0.1588	0.604761	15	0.43166	0.452188	6
4933415F23Rik	-0.09684	0.241012	15	-0.36489	0.127145	7
4933416C03Rik	0.25721	1.65328	15	-0.82863	1.63472	11
4933416E14Rik	0.21334	0.737739	15	0.38047	0.64695	5
4933416I08Rik	-0.17602	0.453063	15	0.42928	0.786934	11
4933417A18Rik	-0.096048	0.266514	15	0.76418	2.03946	9
4933417G07Rik	0.28545	0.946307	15	-0.59759	1.59339	10
4933421I07Rik	-0.11144	0.112709	15	-1.0887	1.03017	4
4933424G06Rik	0.1379	0.437196	15	0.18919	1.31287	8
4933425L06Rik	0.34079	1.26903	15	-0.38172	0.543467	4
4933427D06Rik	-0.18346	0.530046	15	-1.2455	1.16724	3
4933427D14Rik	0.25806	1.13605	15	0.93271	3.0703	9
4933427G17Rik	0.17445	0.712489	15	-0.41321	0.702918	8
4933428G20Rik	0.26824	1.10056	15	-0.23685	0.545826	11
4933428M09Rik	0.73702	4.71865	15	-1.6064	1.2408	5
4933430I17Rik	0.084086	0.215283	15	-0.21393	0.612931	6
4933433C11Rik	0.16216	0.758454	15	-0.40407	0.750948	9
4933434E20Rik	-0.46694	2.60408	15	-3.5084	1.57281	3
4933436I01Rik	0.24363	0.397213	15	0.56141	2.05129	10
5031410I06Rik	-0.94705	5.19455	15	-0.40244	1.18774	4
5031414D18Rik	-0.11439	1.24104	15	-0.1614	1.25619	10
5031439G07Rik	0.42851	1.15727	15	1.0999	1.0572	3
5033404E19Rik	0.2747	1.07852	15	0.53092	0.43181	14
5330417C22Rik	-0.12537	0.490166	15	0.47806	0.332006	5
5430401F13Rik	0.14795	0.66272	15	-0.48979	0.750313	5
5430402E10Rik	0.19525	1.1289	15	0.47701	0.454124	4
5430403G16Rik	0.086019	1.01701	15	1.0654	0.807488	4
5430419D17Rik	0.30837	0.976418	15	0.8478	1.29785	5
5430421N21Rik	0.27103	0.856361	15	0.27928	1.00938	10
5430427O19Rik	0.4366	1.42267	15	0.73365	1.27344	8
5430435G22Rik	0.09056	0.498571	15	0.27915	0.858833	26
5430437J10Rik	0.043679	0.311874	15	0.33738	0.414156	12
5530400C23Rik	0.09062	1.16826	15	-0.47288	0.686027	6
5530401A14Rik	0.26497	1.15391	15	-0.3026	0.318922	5
5730409E04Rik	0.21323	0.64298	15	0.99027	1.29296	10
5730416F02Rik	0.1224	0.644012	15	-0.15099	1.80621	11
5730455P16Rik	0.090046	0.384229	15	1.981	2.2291	4
5730480H06Rik	0.22978	0.371192	15	-0.015829	0.696048	3
5730488B01Rik	0.67168	3.7593	15	0.22237	0.962135	8
5730507C01Rik	0.53851	4.46634	15	1.2046	2.48539	17
5730508B09Rik	0.18311	0.802278	15	-1.0152	1.19201	6
5730522E02Rik	0.34064	1.39332	15	0.93824	1.79496	8
5730559C18Rik	0.23211	0.625307	15	-0.37944	1.08787	12
5730596B20Rik	0.10088	0.211881	15	-0.83178	1.33371	3
5830411N06Rik	0.22011	1.00215	15	0.51807	0.639766	8
5830415F09Rik	0.34388	3.50718	15	0.89973	1.41978	13
5830473C10Rik	0.18686	1.02533	15	1.6488	2.17965	10
6030419C18Rik	0.25461	0.782358	15	-0.21333	1.52817	6
6030458C11Rik	-0.17746	0.662681	15	-1.0781	0.898631	5
6030468B19Rik	0.1279	0.332584	15	0.23886	0.320154	8
6030498E09Rik	0.095017	0.529031	15	0.76316	0.564187	4
6330403A02Rik	0.48328	2.16224	15	-0.13471	1.01216	7
6330403K07Rik	-0.029287	0.495597	15	0.51681	0.58613	6
6330408A02Rik	0.046612	0.435038	15	0.59469	0.833748	7
6330409D20Rik	-0.11782	0.993406	15	-0.95598	1.06961	9
6330415B21Rik	-0.13716	0.496645	15	-0.65186	0.721109	7
6330416G13Rik	0.42053	2.48729	15	1.3008	2.51886	10
6330549D23Rik	-0.054785	0.582462	15	0.5471	0.358566	4
6430531B16Rik	0.10253	0.573863	15	-0.39247	0.435192	10
6430548M08Rik	0.064759	0.422278	15	0.48683	0.862298	7
6430550D23Rik	0.4028	1.83289	15	2.0306	1.64269	4
6430571L13Rik	0.35465	1.51962	15	-0.73873	0.832712	3
6430573F11Rik	0.19055	0.876704	15	0.17747	0.408869	8
6430628N08Rik	0.027837	0.166617	15	-0.036713	0.938095	12
6720489N17Rik	-0.85578	2.2603	15	-1.2929	1.51596	6
6820408C15Rik	0.24917	0.540668	15	-0.11221	0.399604	3
7420426K07Rik	0.45403	1.89579	15	1.5688	1.49576	5
7420461P10Rik	-0.077649	1.41561	15	0.15667	1.27372	9
7530416G11Rik	0.42081	1.43274	15	1.2612	1.31593	6
8030423J24Rik	-0.022791	0.952297	15	0.33879	0.425066	7
8030462N17Rik	0.10642	0.974326	15	-0.0061359	1.38222	9
8030474K03Rik	0.36493	1.73886	15	-0.081272	1.37838	4
8430408G22Rik	0.044251	1.49013	15	0.16183	0.0782147	12
8430419L09Rik	0.056642	0.737407	15	1.5847	1.74362	5
9030617O03Rik	0.18916	0.912645	15	0.37862	0.536435	5
9030624G23Rik	-0.88406	4.07206	15	-1.3447	1.99212	10
9030624J02Rik	-0.59118	3.11266	15	0.034295	0.309547	6
9130008F23Rik	0.014926	0.322667	15	0.44512	0.770472	11
9130011E15Rik	-0.1268	0.812282	15	-0.5349	0.446931	5
9130019O22Rik	-0.0086812	0.619825	15	0.9324	1.05758	4
9130023H24Rik	0.082003	0.46358	15	0.60385	0.277193	5
9130204L05Rik	0.45732	2.79309	15	1.9061	1.78455	7
9130230L23Rik	-0.13114	0.800656	15	-0.74234	1.44775	10
9130401M01Rik	0.18098	0.504844	15	0.88875	2.02903	7
9130409I23Rik	0.23722	0.93226	15	0.69973	1.36764	13
9230102O04Rik	-0.27651	0.83059	15	0.57816	0.715569	6
9230104L09Rik	0.005526	0.368912	15	0.567	0.560952	3
9230110C19Rik	-0.072369	0.53487	15	0.59094	0.524736	4
9230110F15Rik	0.028425	0.513074	15	1.6504	1.86963	6
9230112D13Rik	0.39297	1.24499	15	0.36904	0.474087	4
9330159F19Rik	0.27128	1.83574	15	0.79134	1.11404	10
9330182L06Rik	0.056678	0.932892	15	-2.6724	1.83932	5
9330182O14Rik	-0.23495	0.374163	15	1.2293	1.01691	4
9430007A20Rik	-0.073914	0.325065	15	0.74743	1.21	7
9430015G10Rik	-0.29401	1.73344	15	0.49937	1.29468	7
9430016H08Rik	-0.41404	1.61464	15	-0.098082	0.473777	7
9430020K01Rik	-0.21415	0.4892	15	0.68918	0.658051	5
9430038I01Rik	0.32415	0.991357	15	-0.47909	0.204502	3
9430069I07Rik	0.30538	1.78699	15	0.070839	0.204739	6
9530002B09Rik	0.14684	0.577213	15	1.0525	1.66906	9
9530053A07Rik	0.1176	0.640867	15	-0.24295	1.11547	7
9530068E07Rik	-0.089601	1.70648	15	-0.1312	0.647837	5
9530077C05Rik	0.22382	0.363502	15	-0.1958	0.428326	6
9830107B12Rik	-0.22427	0.603121	15	-0.19021	0.396953	6
9830147E19Rik	0.074666	0.517713	15	0.5957	0.666674	4
9930012K11Rik	-0.17204	0.401823	15	0.032625	1.1518	6
9930021J03Rik	0.038844	1.33263	15	0.24662	1.17512	9
9930111J21Rik1	-0.53874	2.27512	15	0.70466	0.748119	7
9930111J21Rik2	-0.19132	1.18335	15	0.85261	1.38341	4
a	-0.034665	0.129292	15	-0.52424	0.411818	4
A130010J15Rik	-0.099908	0.0475514	15	-1.0043	1.8049	6
A1bg	0.1136	1.16586	15	-0.1545	1.11274	7
A1cf	0.18158	1.35318	15	0.35094	0.556721	10
A230046K03Rik	-0.20277	0.315783	15	0.1968	0.626959	4
A230050P20Rik	-0.12516	0.562218	15	-1.0143	0.713117	3
A230065H16Rik	0.39812	1.76185	15	-0.32267	0.429165	7
A2m	0.21122	0.915567	15	0.34906	0.332668	10
A2ml1	0.3217	1.1032	15	-3.5834	2.62975	4
A330050F15Rik	0.61014	3.11088	15	1.1409	1.44786	7
A330070K13Rik	-0.088692	0.867516	15	-0.085858	0.632085	5
A3galt2	0.49521	2.74661	15	0.97397	2.55468	7
A430005L14Rik	-0.064912	0.325626	15	-0.093741	0.0950952	3
A430033K04Rik	0.2881	0.809556	15	-0.24413	0.559926	11
A430078G23Rik	0.30507	0.796559	9	1.7986	1.75449	4
A430089I19Rik	-1.3808	7.65183	15	-1.4582	2.72531	6
A430105I19Rik	-0.0052688	0.7075	15	0.97991	1.79602	8
A4galt	-0.15145	1.71327	15	-0.0022352	0.56092	14
A4gnt	0.36983	1.64146	15	3.7727	1.76665	3
A530016L24Rik	0.20302	0.899113	15	0.51003	0.620604	8
A530032D15Rik	-1.9886	8.27873	15	-1.3216	1.73391	6
A530064D06Rik	0.54832	3.72983	15	2.2335	1.36854	4
A530099J19Rik	0.099604	0.418733	15	-0.99038	1.01816	4
A630001G21Rik	0.050523	0.916999	15	-0.37552	0.447697	6
A630010A05Rik	0.48776	1.75183	15	0.18461	1.43204	6
A630023A22Rik	0.079485	0.768709	15	3.5335	12.4829	23
A630033H20Rik	0.32557	0.913925	15	0.51097	0.323096	5
A630073D07Rik	0.25862	0.954012	15	-0.19836	0.575331	15
A630076J17Rik	0.0051388	0.109099	15	0.4716	0.551665	3
A630089N07Rik	-0.16844	0.681144	15	1.0233	1.3828	10
A630095E13Rik	0.095207	0.145111	15	0.31866	0.646642	6
A630095N17Rik	0.19771	1.6628	15	1.5209	1.93007	8
A730013G03Rik	0.33727	1.05265	15	-0.22013	0.959516	7
A730017C20Rik	0.22333	2.19135	15	0.48862	0.508064	6
A730046J19Rik	0.25177	1.01789	15	-1.0787	0.814146	4
A830018L16Rik	-0.045324	0.453605	15	0.13174	0.775622	6
A830080D01Rik	0.066725	1.1002	15	1.0843	1.50592	8
A930003A15Rik	0.14303	1.09222	15	0.36919	0.291715	10
A930004D18Rik	0.0035168	0.631955	15	0.20809	1.37961	7
A930017K11Rik	0.061005	0.220173	15	-0.087115	0.447344	4
A930017M01Rik	0.26042	0.74625	15	-1.0011	0.971144	7
A930018P22Rik	0.1777	0.726489	15	-0.84172	1.18099	8
A930033H14Rik	0.29626	1.12597	15	0.15999	0.760325	5
AA413626	0.032817	0.348509	15	0.42902	0.338149	7
AA414768	0.21257	0.57641	15	0.064964	0.391527	7
AA415398	0.27094	0.908755	15	0.4138	0.561094	8
AA467197	0.16674	0.896128	15	0.38947	0.797648	13
AA543401	0.034815	1.04861	15	0.56989	0.389201	5
AA619741	-0.36094	1.31214	15	0.60488	0.701627	5
AA792892	-0.10979	0.250998	15	-0.43509	0.256161	4
AA986860	0.18942	0.198713	15	-0.2367	0.406825	13
Aaas	-0.079173	0.674423	15	0.43965	0.792878	15
Aacs	-0.52884	2.7508	15	-0.16559	2.06155	9
Aadac	0.055868	1.42646	15	0.40353	1.01088	10
Aadacl2	0.2088	0.926062	15	-0.37837	0.449735	10
Aadacl3	0.0076092	0.611721	15	0.38461	0.922887	9
Aadat	0.59525	3.25966	15	0.54501	0.476553	7
Aaed1	0.066105	0.0843258	15	1.356	1.02115	4
Aagab	-0.63274	1.6998	15	0.16771	0.535749	4
Aak1	0.18144	0.684428	15	0.48098	1.73168	9
Aamdc	0.13682	0.131967	15	0.60694	0.729158	8
Aamp	-2.9228	10.5591	15	-1.7189	1.374	3
Aanat	0.47927	1.67828	15	-0.54268	0.647258	6
Aar2	-0.35588	1.16663	15	0.34795	1.04507	6
Aard	-0.026455	0.453581	15	0.88749	0.975104	6
Aars	-4.0635	23.0094	15	-3.6864	3.68662	8
Aars2	-0.40814	2.82833	15	-1.1344	1.75825	8
Aarsd1	0.0077029	0.242809	15	-0.17936	0.124025	3
Aasdh	-0.24453	0.899836	15	0.28087	0.595389	6
Aasdhppt	-2.9764	16.3053	15	-2.9912	2.65853	6
Aass	0.15835	0.858393	15	-0.55262	1.05883	9
Aatf	-1.9499	7.47378	15	-2.9024	3.53688	9
Aatk	-0.13016	0.780625	15	-0.72209	0.783702	8
AB124611	-0.047089	0.438088	15	-0.069175	0.272296	7
Abat	0.11062	0.761377	15	-0.17423	0.493022	5
Abca12	0.44113	3.0647	15	1.0952	1.02739	4
Abca13	-0.3439	1.51872	15	-0.35619	1.16748	13
Abca14	0.35394	1.44407	15	-0.20187	0.177048	9
Abca15	0.21328	0.936216	15	1.7703	1.55176	4
Abca16	0.19079	0.573814	15	0.21385	1.19207	11
Abca17	0.20276	0.535138	15	-1.0085	0.854493	5
Abca2	-0.022804	0.378388	15	-1.0944	1.04387	6
Abca3	-0.11998	0.944698	15	-0.041454	0.525842	10
Abca4	0.34621	2.12116	15	-0.71873	0.830502	7
Abca5	0.32284	1.41092	15	0.49322	0.618416	4
Abca6	-0.11735	0.569409	15	-0.21948	0.764573	12
Abca7	0.3541	1.841	15	-0.75056	1.1713	12
Abca8a	0.23738	0.540758	15	0.47162	0.419337	8
Abca8b	0.078871	2.37468	15	0.96783	1.13579	6
Abca9	0.59841	2.80844	15	-0.63727	0.919193	5
Abcb10	-0.1105	1.87491	15	0.002973	1.09343	12
Abcb11	0.020486	1.0935	15	-2.199	1.54748	3
Abcb1a	0.25882	1.85307	15	-0.85394	1.02159	8
Abcb1b	0.070255	0.543315	15	0.15603	0.657814	11
Abcb4	0.26004	1.56883	15	0.20369	0.568363	9
Abcb5	0.19198	1.75424	15	1.3752	1.84946	8
Abcb6	0.07488	0.877195	15	-0.83463	1.33727	9
Abcb7	-2.51	11.5379	15	-0.52116	1.73201	13
Abcb8	0.080633	0.871084	15	-0.72306	1.12254	13
Abcb9	-0.030213	1.16955	15	-0.31566	0.561853	5
Abcc1	0.043182	0.221407	15	-0.31347	0.69897	21
Abcc10	0.44503	2.11265	15	-0.60308	1.35501	10
Abcc12	0.041234	0.430942	15	-0.10286	0.126778	8
Abcc3	0.085842	0.503319	15	1.2479	1.28107	6
Abcc4	0.38826	2.04786	15	0.641	0.956952	11
Abcc5	0.17473	1.85251	15	0.062736	1.25399	13
Abcc6	0.25499	0.940512	15	-0.62204	1.29526	13
Abcc8	-0.23422	1.2976	15	0.65157	1.29519	10
Abcc9	0.49345	2.61932	15	-0.001075	0.322585	8
Abcd1	-0.017088	1.04954	15	-0.20113	1.26486	8
Abcd2	0.20919	1.69566	15	-0.88036	1.08195	11
Abcd3	-0.074552	1.00422	15	-0.2978	1.43442	8
Abcd4	-0.15432	1.35189	15	0.70037	0.726883	8
Abce1	-4.2933	20.3454	15	-4.1674	5.91765	13
Abcf1	-2.7846	20.8601	15	-0.60379	1.61497	5
Abcf2	-0.11426	2.29227	15	-0.38963	0.686428	12
Abcf3	-0.148	1.15111	15	0.73672	0.835826	9
Abcg1	0.37529	2.80643	15	0.34952	0.278082	12
Abcg2	0.15485	0.842362	15	-0.02006	1.24816	10
Abcg4	0.20416	2.77689	15	0.5021	2.26562	9
Abcg5	0.09015	0.961539	15	-0.17715	0.929297	10
Abcg8	0.37615	1.89685	15	-0.50566	0.98898	6
Abhd1	0.12971	1.47108	15	-0.16666	0.591065	10
Abhd10	0.16178	2.5399	15	0.67075	0.933152	8
Abhd11	0.027576	0.851613	15	-0.20125	1.08663	8
Abhd11os	0.35745	0.880381	15	-0.58025	2.61044	6
Abhd12	0.36123	2.31335	15	-0.19496	0.525128	8
Abhd12b	0.4131	2.24061	15	-0.41896	1.02943	12
Abhd13	0.18072	0.88429	15	-0.46183	1.16451	8
Abhd14a	0.013037	0.521376	15	-0.57055	0.594534	8
Abhd14b	0.28446	1.396	15	-0.5425	1.81736	8
Abhd15	-0.038104	2.12175	15	0.51286	1.20669	9
Abhd16a	-0.1358	2.04187	15	0.77757	0.828244	9
Abhd16b	0.13267	1.25029	15	0.31676	0.2382	13
Abhd17a	0.12901	0.830149	15	1.0235	1.61121	3
Abhd17b	0.28584	1.23142	15	-0.77929	1.17434	8
Abhd17c	0.10453	0.852695	15	-1.0346	1.97646	12
Abhd2	0.17532	1.34253	15	0.14584	0.383682	11
Abhd3	0.16755	0.478953	15	0.13109	0.073673	5
Abhd4	0.20983	1.26025	15	0.11689	0.0655773	5
Abhd5	0.24409	1.34616	15	0.41603	0.82842	10
Abhd6	0.086158	0.468981	15	-0.094012	1.70119	7
Abhd8	-0.0064716	1.09407	15	-1.943	1.81861	7
Abi1	-0.0041057	1.0694	15	0.025957	0.492738	17
Abi2	0.062183	0.607813	15	-0.3112	2.07932	11
Abi3	0.022833	0.586583	15	0.44272	0.772268	8
Abi3bp	0.078918	2.13615	15	-0.44036	1.61119	5
Abl1	-0.2233	1.24837	15	-0.5507	1.14374	28
Abl2	-0.0038191	0.349149	15	0.93899	3.01165	12
Ablim1	0.118	1.0217	15	0.31598	1.02607	8
Ablim2	-0.0031957	0.446129	15	0.012142	1.28786	10
Abo	0.30006	2.10874	15	-0.10526	1.20131	6
Abr	0.088711	0.711863	15	0.62547	1.20081	10
Abra	-0.018128	0.985395	15	0.668	0.831738	10
Abracl	0.1987	0.637009	15	-1.4298	1.93289	8
Abt1	-3.5319	10.2125	15	-2.9636	2.10321	4
Abtb1	0.1216	0.642923	15	-0.41717	0.550954	15
Abtb2	0.23082	1.12987	15	0.42147	1.12785	19
AC124764.1	0.21386	0.939189	15	-1.6372	1.57305	4
AC168977.1	-0.89092	4.19645	15	-0.73894	0.855395	9
Acaa1a	0.22146	1.05738	15	0.67641	0.807711	11
Acaa1b	0.064507	0.54826	15	0.48514	0.857204	10
Acaa2	0.11444	1.49816	15	1.1523	1.11063	6
Acaca	-0.94498	6.44406	15	-0.68551	0.938397	9
Acacb	0.023362	0.9049	15	-0.40686	1.2795	17
Acad10	0.26648	1.70303	15	0.072084	0.0570896	5
Acad11	0.027136	0.33425	15	0.16042	0.252192	15
Acad12	0.10957	0.348867	15	0.92229	1.42502	7
Acad8	-0.059507	1.63216	15	0.26598	0.747365	10
Acad9	-0.030922	0.876704	15	-0.18616	0.490609	10
Acadl	0.12946	0.741746	15	0.24843	1.98957	13
Acadm	-0.094836	0.235592	15	-0.9984	1.58833	8
Acads	0.14741	0.778794	15	-0.63624	1.34331	7
Acadsb	0.2801	1.40863	15	-0.82282	0.739332	5
Acadvl	-0.17336	0.556033	15	0.92729	1.45161	11
Acan	0.031566	0.301117	15	0.072084	0.498229	15
Acap1	0.11168	0.844634	15	0.048205	0.256224	9
Acap2	0.2457	1.44972	15	0.91627	1.87546	10
Acap3	0.3613	1.57886	15	0.5564	0.548428	6
Acat1	-0.28304	1.70014	15	-1.2374	1.60255	9
Acat2	0.021426	0.713521	15	0.072084	0.835826	17
Acat3	0.17855	0.920855	15	2.0759	1.19895	3
Acbd3	0.28402	2.38581	15	-0.79916	1.65488	14
Acbd4	-0.036523	1.75741	15	0.073929	0.368566	4
Acbd5	-0.09456	0.243486	15	-3.4534	2.79615	5
Acbd6	0.38054	2.58862	15	-0.12534	0.464972	7
Acbd7	-0.11469	0.294085	15	-0.17881	0.640108	6
Accs	0.059062	1.65993	15	-0.5119	1.83218	5
Accsl	-0.29894	0.902708	15	0.83051	0.796777	6
Acd	-0.17118	1.01584	15	-0.1743	0.685711	5
Ace	-0.13799	0.411605	15	-1.4052	1.19732	4
Ace2	0.30312	1.36831	15	-0.55221	0.519131	9
Ace3	0.074842	0.2873	15	-3.0077	2.66694	7
Acer1	0.15529	0.391816	15	1.1021	1.74686	13
Acer2	0.044236	0.932223	15	0.28289	0.590134	20
Acer3	-0.12701	1.05915	15	-1.3769	1.21114	6
Ache	0.26148	1.45908	15	-0.50005	0.726513	14
Acin1	-0.35891	1.57978	15	-1.2208	1.31705	7
Ackr1	-0.037119	1.39303	15	-0.13219	0.695984	8
Ackr2	0.19438	2.29227	15	-0.59258	0.578264	9
Ackr3	0.28268	1.42614	15	0.52075	0.737525	9
Ackr4	-0.17506	1.3619	15	-0.6265	1.22703	10
Acly	-0.25647	1.67817	15	-0.46715	0.360344	14
Acmsd	0.23939	1.6283	15	0.016561	1.01996	6
Acnat1	0.21777	1.19846	15	0.47776	0.931109	9
Acnat2	0.4652	1.8414	15	0.30225	0.906333	12
Aco1	0.020058	0.112231	15	0.87972	1.0756	10
Aco2	0.15374	1.3106	15	-0.3426	0.602129	13
Acot1	0.7939	6.627	15	0.70989	0.949311	6
Acot10	0.42135	2.84288	15	-0.12759	1.01216	7
Acot11	0.1512	0.645738	15	0.074471	0.453642	14
Acot12	0.23101	1.28142	15	-0.12836	1.52673	13
Acot13	0.21527	1.73149	15	0.48233	1.15627	14
Acot2	0.61786	4.80195	15	1.1095	1.47339	10
Acot3	0.40644	2.7306	15	1.096	0.783043	3
Acot4	-0.12926	0.671845	15	-1.0039	1.33018	10
Acot6	-0.15143	1.37257	15	-0.30636	1.11274	7
Acot7	0.45461	2.86938	15	0.63183	0.933637	15
Acot8	0.033179	1.45398	15	-1.0547	1.17262	7
Acot9	0.039792	0.238884	15	-0.83764	1.16237	10
Acox1	0.034882	0.439902	15	0.26657	1.07151	6
Acox2	0.47474	2.13118	15	-0.33517	1.76993	8
Acox3	0.30719	2.47809	15	-0.26773	1.78731	15
Acoxl	0.080711	1.63519	15	-0.40436	1.28642	9
Acp1	-0.20143	1.65805	15	0.041381	1.43413	13
Acp2	0.11445	0.424466	15	-0.5545	0.933301	4
Acp5	-0.064978	0.755426	15	-8.5783e-05	1.14096	8
Acp6	0.27612	1.91779	15	0.29718	0.60639	13
Acpp	-0.14454	0.450715	15	0.38507	1.13684	11
Acpt	0.01992	0.106493	15	-1.4219	1.6173	6
Acr	0.18239	1.04108	15	-0.014207	1.29805	21
Acrbp	0.04241	0.277489	15	0.37223	0.922887	9
Acrv1	-0.11858	0.075173	15	0.59469	0.874747	5
Acsbg1	0.15982	0.555612	15	-0.63114	0.786164	9
Acsbg2	0.32461	1.95636	15	0.71705	1.21763	5
Acsf2	-0.15547	1.00123	15	-0.38298	0.398288	7
Acsf3	0.054975	1.0885	15	0.44533	0.532081	6
Acsl1	-0.0063935	1.89908	15	0.94463	1.25856	8
Acsl3	-0.54147	2.95652	15	0.23007	0.596811	10
Acsl4	-0.65763	3.98318	15	0.5114	1.18572	8
Acsl5	-0.17491	1.22894	15	-0.14072	0.285872	12
Acsl6	0.17187	1.0111	15	0.61966	4.43045	15
Acsm1	0.2437	1.62452	15	-1.0291	0.863311	5
Acsm2	0.023154	0.60806	15	0.67319	0.74043	9
Acsm3	0.058295	0.995636	15	-0.060869	2.18794	7
Acsm4	0.17359	1.7986	15	0.20252	0.633652	5
Acss1	0.019021	0.547248	15	0.26335	0.214407	5
Acss2	0.33693	1.89384	15	0.29436	1.59464	16
Acss3	0.19468	0.981591	15	0.82399	1.21973	12
Acta1	0.40288	2.89695	15	-0.36534	0.328337	23
Acta2	-0.080252	0.568058	15	0.81876	0.896128	6
Actb	-0.31981	2.34418	15	0.11579	0.624885	9
Actbl2	-0.052468	0.436021	15	0.3803	0.543923	5
Actc1	0.062302	0.191897	15	-0.13321	0.414742	5
Acte1	0.25702	0.531033	15	0.64528	0.601279	5
Actg1	-0.51267	3.64853	15	-0.36679	1.41049	14
Actl10	0.030879	0.936704	15	-0.75325	1.00772	7
Actl11	-0.15459	0.540427	15	-0.75753	1.11894	4
Actl6a	-2.4853	14.1038	15	-2.1555	3.05451	10
Actl6b	0.21011	0.578577	15	-0.031594	0.928965	8
Actl7a	0.10424	0.259843	15	1.1716	2.00689	12
Actl7b	-0.26392	1.27385	15	0.44034	0.607461	8
Actl9	0.11984	0.402843	15	-0.41681	0.795148	10
Actn1	0.19204	1.01706	15	-0.72825	1.34601	16
Actn2	0.047331	0.80148	15	-0.37738	0.713274	17
Actn3	0.13463	0.278734	15	0.74194	0.666371	5
Actn4	0.080568	1.58855	15	-0.13034	0.768913	19
Actr10	-0.4334	2.23056	15	-0.40784	1.25026	4
Actr1a	-0.65723	2.99835	15	-0.51581	2.10229	11
Actr1b	0.025884	0.403887	15	0.29581	1.09156	6
Actr2	-2.4719	14.4767	15	-1.2337	1.96035	8
Actr3	-1.871	19.6033	15	-2.3177	2.39156	9
Actr3b	0.010325	0.679688	15	1.3195	1.24267	4
Actr5	0.10119	1.82725	15	0.09979	0.702524	9
Actr6	-1.1296	4.21363	15	0.58193	0.962135	8
Actr8	-1.3845	5.8288	15	-0.43771	0.561473	7
Actrt1	0.051661	0.57551	15	0.63272	0.653549	3
Actrt2	0.13993	0.464719	15	-0.11694	0.897086	9
Actrt3	0.038464	0.814685	15	0.2849	0.884689	3
Acvr1	-0.25129	1.77301	15	0.99118	1.63854	14
Acvr1b	0.099619	1.2777	15	-3.0695	4.26075	12
Acvr1c	0.011818	0.61838	15	-0.85052	2.35012	12
Acvr2a	-0.026484	0.486183	15	-0.19145	0.878933	18
Acvr2b	0.10279	0.612717	15	0.36223	0.856704	13
Acvrl1	-0.065593	1.92035	15	0.14596	1.40686	12
Acy1	-0.046766	1.14857	15	-0.47753	0.49842	3
Acy3	-0.019542	0.654136	15	-0.47531	0.414675	9
Acyp1	-0.039833	0.607743	15	-0.43553	1.11047	5
Acyp2	0.092252	1.16803	15	-0.10461	2.11885	10
Ada	0.086243	0.392802	15	0.22572	2.14513	11
Adad1	0.14056	1.48904	15	0.053767	0.403689	16
Adad2	-0.22999	1.6924	15	-0.5628	1.25211	16
Adal	0.042298	0.912964	15	-0.26847	0.133967	20
Adam10	0.11575	0.842936	15	-1.8661	2.97774	13
Adam11	0.035137	0.984515	15	-0.45156	0.153681	7
Adam12	-0.027306	0.471263	15	0.21126	0.490636	4
Adam15	0.26886	1.44058	15	0.61157	0.80936	7
Adam17	0.18003	1.37887	15	0.60682	1.05232	12
Adam18	0.44594	2.97931	15	0.074292	0.515885	9
Adam19	0.023348	0.548244	15	0.50268	0.784204	8
Adam1b	0.22414	0.347763	15	0.05157	0.604551	4
Adam2	0.18413	1.12265	15	0.01629	0.338414	10
Adam20	0.41075	2.84808	15	-0.18752	0.552578	4
Adam21	0.12842	0.842755	15	0.8282	0.744221	3
Adam22	0.11311	1.72058	15	-0.7322	0.740263	5
Adam23	-0.161	1.65212	15	-0.34435	0.598375	12
Adam24	0.40309	1.62131	15	0.031144	0.580722	14
Adam25	0.35281	1.63264	15	1.1373	1.89935	10
Adam26a	0.3613	1.93663	15	-0.47728	0.755822	8
Adam26b	-0.06919	1.0677	15	0.017432	0.248275	4
Adam28	0.26272	2.84158	15	0.70272	0.917035	6
Adam29	0.034931	0.568958	15	0.42957	1.14046	6
Adam3	0.18183	0.686935	15	0.9029	1.21816	5
Adam30	0.11046	0.388882	15	0.81414	0.796749	7
Adam32	0.12335	0.695811	15	-1.0999	1.27165	5
Adam33	-0.083544	1.23435	15	2.3722	2.13012	7
Adam34	0.25208	0.588162	15	1.9171	1.2232	3
Adam39	0.30857	3.83333	15	0.77417	1.25803	9
Adam4	0.75721	3.15048	15	-4.5627	3.61586	6
Adam5	0.19686	1.02835	15	0.14514	0.558588	12
Adam6a	-0.054396	0.164601	15	-0.41225	0.22396	4
Adam6b	0.015006	0.343892	15	-0.31058	0.264848	6
Adam7	0.28898	1.20869	15	-0.30634	0.408713	9
Adam8	0.45593	3.23019	15	0.3958	0.72846	16
Adam9	-0.081079	0.932223	15	0.6609	0.69947	7
Adamdec1	0.015181	0.786217	15	1.4413	1.55475	8
Adamts1	0.12617	0.561663	15	-0.45638	0.746226	6
Adamts10	0.15549	0.781438	15	0.031611	0.88429	16
Adamts12	0.082404	1.12847	15	-0.43457	0.698861	7
Adamts13	0.34924	1.92314	15	0.37955	2.37469	16
Adamts14	0.31435	1.62606	15	-0.2216	0.282488	9
Adamts15	0.3659	1.81175	15	0.44112	0.732664	9
Adamts16	0.09154	1.25675	15	0.24463	0.475435	7
Adamts17	0.18989	2.34509	15	-0.22512	1.23312	16
Adamts18	0.37039	2.92263	15	0.070014	0.568508	6
Adamts19	0.32887	1.45004	15	0.61387	0.939831	6
Adamts2	0.17553	1.08754	15	-0.44214	0.573603	11
Adamts20	0.49192	2.70983	15	-0.13488	0.511675	5
Adamts3	0.10596	0.529663	15	0.080056	0.633073	5
Adamts4	-0.0033143	2.00042	15	0.30226	0.528943	11
Adamts5	-0.10685	1.10574	15	0.082361	0.506347	11
Adamts6	0.075076	0.412098	15	-0.33901	0.402129	7
Adamts7	0.15773	1.31269	15	0.019786	0.975473	10
Adamts8	-0.12519	0.90735	15	-0.55428	0.294924	5
Adamts9	0.050316	1.51473	15	0.2308	1.11485	8
Adamtsl1	0.21315	0.880546	15	-0.42816	0.575657	11
Adamtsl2	0.21836	1.49998	15	-0.14795	0.677677	10
Adamtsl3	0.051852	0.768072	15	-0.024007	0.527609	6
Adamtsl4	0.022046	0.985018	15	0.26246	0.636069	11
Adamtsl5	0.17473	0.693168	15	0.3372	0.641095	8
Adap1	0.067024	1.33826	15	0.54059	1.10833	40
Adap2	0.32139	2.19355	15	0.0085621	0.582611	11
Adar	-1.9498	11.9616	15	0.032495	1.55374	21
Adarb1	0.26353	1.57311	15	0.84216	2.34528	10
Adarb2	0.10839	0.54327	15	-1.298	3.77767	10
Adat1	0.045133	0.505303	15	0.78395	0.862931	9
Adat2	-1.7065	8.78246	15	-2.7655	3.00091	6
Adat3	-1.7811	8.97519	15	-1.8125	3.665	9
Adck1	0.2362	1.55664	15	-0.074637	0.771882	11
Adck2	0.073157	0.898425	15	-0.1944	1.46814	7
Adck3	-0.26336	1.68674	15	0.019088	0.495529	11
Adck4	0.08155	1.5245	15	0.47297	1.54523	7
Adck5	0.30347	1.42254	15	-0.24768	0.0857627	5
Adcy1	0.16195	0.754956	15	0.37931	0.327219	14
Adcy10	0.27826	1.50674	15	-0.33696	0.876181	12
Adcy2	0.12847	0.993363	15	-0.15692	0.335161	19
Adcy3	-0.085442	1.37756	15	-2.2474	1.98055	7
Adcy4	-0.069463	0.534439	15	0.85232	1.58208	7
Adcy5	-0.12816	0.464111	15	-0.10925	0.366168	15
Adcy6	0.18627	2.4944	15	0.42669	1.60464	15
Adcy7	-0.010346	0.98898	15	-0.48963	0.549628	17
Adcy8	0.1901	0.871827	15	-0.26492	0.0700551	9
Adcy9	-0.12986	0.935392	15	-0.64711	0.949041	13
Adcyap1	0.061727	1.43596	15	0.23409	0.338358	10
Adcyap1r1	0.16305	0.838932	15	0.62047	1.46843	26
Add1	0.2113	1.56204	15	-0.31448	0.538892	9
Add2	0.10745	0.593988	15	0.53227	1.20395	18
Add3	0.078716	0.242058	15	0.084686	1.71733	6
Adgb	0.27178	1.04962	15	0.37265	2.82807	6
Adgra1	0.10215	0.589661	15	-0.59211	1.02379	9
Adgra2	0.41715	1.80768	15	0.31005	0.898184	8
Adgra3	0.14748	0.609294	15	0.041381	0.127255	7
Adgrb1	-0.052408	1.03032	15	0.06962	0.800958	8
Adgrb2	0.16729	4.31767	15	0.73512	1.68734	5
Adgrb3	0.16376	0.520497	15	-0.0048948	1.90253	9
Adgrd1	0.17579	1.21131	15	-0.76107	0.90879	6
Adgrd2-ps	0.12371	1.10652	15	0.28905	1.1838	7
Adgre1	0.028003	0.712176	15	-1.9811	1.44152	5
Adgre4	-0.08221	1.42943	15	-1.0072	1.11721	9
Adgre5	0.17465	1.09571	15	-0.17815	0.404195	8
Adgrf1	0.095338	1.98309	15	-0.50129	0.630265	13
Adgrf2	0.27303	2.00198	15	-0.12426	0.445281	12
Adgrf3	-0.097754	0.476332	15	0.07472	1.18778	8
Adgrf4	-0.09363	0.415635	15	-0.48216	1.65376	8
Adgrf5	0.033873	0.986068	15	-0.28573	0.160572	11
Adgrg1	0.054992	1.60655	15	-0.61583	0.858362	13
Adgrg2	0.2537	3.40619	15	1.1733	2.07992	6
Adgrg3	-0.20343	1.21645	15	0.026713	1.21881	12
Adgrg4	0.23792	3.625	12	0.41964	0.285444	7
Adgrg5	0.23117	1.85174	15	0.34479	0.436211	9
Adgrg6	0.21304	1.37882	15	0.75807	0.906894	6
Adgrg7	0.12436	0.259045	15	-0.26968	1.44634	11
Adgrl1	0.11911	1.38617	15	-1.211	1.57455	11
Adgrl2	0.045903	0.677057	15	0.29095	0.329457	6
Adgrl3	0.41185	2.43119	15	0.89504	1.04426	6
Adgrl4	0.073593	1.49633	15	-0.1509	0.347841	12
Adgrv1	0.11925	0.442637	15	0.66211	2.20129	17
Adh1	0.29773	1.31205	15	-0.72247	0.763236	7
Adh4	0.38213	2.20341	15	-0.30204	0.478156	8
Adh5	0.31462	1.43147	15	0.13536	0.259732	6
Adh6a	0.19768	0.800958	15	0.37324	0.45705	6
Adh6b	0.34176	1.22817	15	0.41831	0.732664	9
Adh7	-0.20209	1.49731	15	0.57116	0.559122	4
Adhfe1	0.034041	0.669972	15	0.96906	1.66819	12
Adi1	0.12858	0.722804	15	0.31623	1.08675	18
Adig	-0.09769	0.816417	15	-0.38853	0.647528	8
Adipoq	0.1519	1.54929	15	-0.58264	0.871245	9
Adipor1	-0.20275	1.06172	15	-0.91254	1.12314	9
Adipor2	0.19877	1.71783	15	-0.52526	1.3622	13
Adk	0.066669	0.728112	15	-0.65803	0.927934	13
Adm	0.17339	1.08439	15	0.070627	1.14096	8
Adm2	0.01379	0.592694	15	-0.35072	0.758379	10
Adnp	0.13489	0.439759	15	-1.1736	1.30491	4
Adnp2	-0.25068	0.455015	15	1.2387	1.93667	6
Ado	0.22945	1.27657	15	0.071775	0.605566	4
Adora1	0.18872	1.16976	15	0.49911	0.816531	13
Adora2a	0.13987	1.03951	15	-0.48407	0.803962	14
Adora2b	-0.14698	0.522474	15	0.68544	1.21636	14
Adora3	0.12362	0.996669	15	0.10769	1.41339	11
Adpgk	-0.11717	1.41131	15	-0.34152	1.0504	14
Adprh	0.38806	1.61809	15	0.68429	1.02661	10
Adprhl1	0.080238	0.992252	15	-0.52888	0.966737	12
Adprhl2	-0.10567	0.279345	15	0.156	1.30353	8
Adprm	0.094904	0.428454	15	-1.1589	0.780546	3
Adra1a	0.243	1.26803	15	1.4017	2.64693	13
Adra1b	-0.014751	0.632439	15	-0.0548	0.97786	19
Adra1d	-0.089719	0.764396	15	0.39717	1.58494	20
Adra2a	0.44895	3.07468	15	0.10221	0.686386	15
Adra2b	0.17974	1.09937	15	0.6552	1.56338	20
Adra2c	0.0059654	1.75073	15	-0.085858	0.832299	15
Adrb1	0.35975	2.73565	15	0.26626	0.571493	14
Adrb2	0.38228	3.22874	15	0.56479	1.58539	19
Adrb3	0.1499	0.592133	15	-0.28838	0.988472	17
Adrbk1	0.088242	1.1829	15	-0.24013	0.525521	14
Adrbk2	0.21386	1.22616	15	0.16218	0.971022	8
Adrm1	-1.0968	11.862	15	-1.3582	2.405	15
Adsl	-0.58	3.83245	15	-1.2321	0.999306	5
Adss	0.044959	1.81821	15	-0.017093	0.518099	11
Adssl1	0.026691	1.06571	15	-0.11635	0.479333	13
Adtrp	0.30076	0.981966	15	-0.55923	0.857611	4
Aebp1	0.1179	1.21255	15	0.27997	0.733439	14
Aen	-0.078561	0.915066	15	-0.2556	0.37899	12
Aes	-0.075684	0.137606	15	0.3803	1.12946	7
AF067061	0.1722	0.900043	15	0.11841	0.249885	11
AF067063	-0.18033	0.451561	15	0.61462	0.97363	6
AF357399	-0.0039342	0.322265	15	-0.45923	0.41419	4
AF357425	0.30739	0.872798	15	-0.29596	0.361231	4
AF366264	0.010032	0.147233	15	0.26942	1.4796	4
Afap1	0.55099	3.96098	15	-0.12534	0.677884	11
Afap1l1	4.5977e-05	0.254129	15	0.60932	0.670887	7
Aff1	-0.011046	0.439137	15	-0.65068	1.05196	12
Aff2	0.11209	0.960467	15	0.95784	0.797484	5
Aff3	-0.11023	0.806653	15	0.58625	0.53034	6
Aff4	0.039727	0.569506	15	-0.19934	0.386264	3
Afg3l1	0.3254	1.1242	15	1.3013	2.00629	9
Afg3l2	0.14461	0.922124	15	0.59068	1.26341	19
Afm	0.088241	1.88362	15	0.50831	0.429854	6
Afmid	0.14951	0.923614	15	-0.62331	1.12554	16
Afp	0.24154	1.26977	15	-0.54625	0.847498	12
Aftph	-0.052135	1.02396	15	0.26172	1.15674	5
Aga	-0.0744	0.0402481	15	-0.25921	0.321709	7
Agap1	0.063943	0.48455	15	0.28549	0.732664	9
Agap2	0.031671	0.244979	15	0.11143	0.474683	11
Agap3	-0.044709	0.0579026	15	0.92557	2.09	13
Agbl1	0.17168	1.42961	15	0.47445	0.429866	6
Agbl2	0.12894	1.3926	15	-1.0378	1.11257	4
Agbl3	0.12541	0.298406	15	-0.1181	1.64737	12
Agbl4	0.18504	1.51211	15	0.1706	0.636012	6
Agbl5	0.2309	1.76805	15	0.17005	0.889242	14
Ager	-0.097786	0.878342	15	0.36704	0.982132	11
Agfg1	-0.15592	0.514861	15	0.065616	0.369491	3
Agfg2	0.075585	0.497354	15	-0.028158	0.100163	11
Aggf1	0.14247	1.16757	15	-0.12534	0.861098	15
Agk	-0.076751	0.929002	15	0.33166	0.719012	8
Agl	0.20547	1.41218	15	-0.28525	0.837406	14
Agmat	0.12125	0.950666	15	1.2335	1.51305	7
Agmo	-0.19717	1.42845	15	-0.3374	0.479844	6
Ago1	0.21687	0.750337	15	-0.60919	0.6094	5
Ago2	-0.26779	2.26955	15	-1.9411	3.21316	15
Ago3	0.18981	0.578544	15	-0.37389	0.804903	4
Ago4	-0.10807	0.214784	15	0.71104	1.18803	6
Agpat1	0.2743	2.4063	15	-0.15254	1.02601	7
Agpat2	0.14164	0.671172	15	-0.79825	1.11008	13
Agpat3	0.22341	1.28459	15	-0.2024	0.79485	18
Agpat4	0.12911	1.13614	15	-0.22401	1.18993	7
Agpat5	0.17492	1.56876	15	-0.25115	0.218324	9
Agpat6	0.015189	1.49519	15	-0.129	0.401013	5
Agpat9	0.22829	0.842725	15	-0.56978	0.749263	8
Agps	-0.00012456	1.04557	15	-1.138	2.13344	13
Agr2	-0.10036	1.21579	15	-0.12759	0.39807	3
Agr3	0.051519	0.867516	15	-0.55554	0.593664	4
Agrn	0.15657	0.321892	15	-0.13042	0.304151	5
Agrp	0.049179	0.364114	15	-0.19267	0.937531	10
Agt	0.17804	0.909601	15	-0.99035	1.55266	11
Agtpbp1	-0.0060575	0.809921	15	0.37436	0.742561	11
Agtr1a	0.24761	1.55311	15	0.60753	0.7325	7
Agtr1b	0.60177	4.74878	15	-0.23329	0.386951	15
Agtr2	0.15828	0.739547	15	-0.093111	0.33113	7
Agtrap	-0.1263	0.130622	15	0.42385	0.878506	8
Agxt	-0.14213	1.06303	15	0.31244	0.872733	6
Agxt2	0.07165	0.962574	15	0.53798	0.622894	9
Ahctf1	-2.3279	10.5296	15	-3.307	2.48017	6
Ahcy	-0.16055	0.749092	15	-0.23898	0.56891	11
Ahcyl1	-0.34952	2.16899	15	-0.55852	1.47864	13
Ahcyl2	0.19496	1.32257	15	-0.072108	1.00208	15
Ahdc1	0.050126	0.326196	15	0.064515	0.263492	9
Ahi1	-0.085427	0.260167	15	2.0925	2.65098	5
Ahnak2	-0.1321	0.900043	15	-0.18432	1.18502	7
Ahr	0.20745	2.21129	15	0.13181	0.570926	9
Ahrr	0.35103	1.37486	15	-0.35711	0.375038	4
Ahsa1	0.36278	2.60183	15	0.3178	0.313373	6
Ahsa2	0.13846	0.402908	15	0.57661	0.693382	7
Ahsg	-0.0069808	0.786482	15	-0.77806	0.855893	4
AI118078	0.3276	1.63988	15	0.1546	2.97625	10
AI182371	-0.027911	0.210314	15	0.15902	0.429037	10
AI314180	-0.060201	0.410441	15	-0.65333	0.632775	5
AI317395	-0.029512	0.933711	15	-0.13034	1.4961	5
AI413582	-0.023439	0.608306	15	-0.57189	0.88867	6
AI429214	0.3811	1.25459	15	0.85901	1.69506	8
AI464131	0.36345	2.08351	15	0.26399	0.61997	7
AI467606	0.014158	0.525638	15	-0.66073	0.792689	5
AI593442	0.33143	1.73693	15	-0.6604	0.861918	9
AI597479	-0.57929	3.75198	15	-0.83868	1.57487	11
AI607873	0.40239	1.91006	15	1.2406	1.09045	5
AI661453	0.23909	0.473893	15	-0.16451	1.22435	11
AI837181	0.012004	0.554847	15	1.2926	1.47694	9
AI846148	-0.035197	0.37369	15	-0.018751	0.211521	6
AI854703	0.12636	0.450751	15	0.34605	0.413886	4
AI987944	0.15224	1.02118	15	0.88875	1.06334	11
Aicda	0.14075	1.14201	15	0.25069	0.634194	17
Aida	-0.25397	0.483504	15	2.337	1.88659	4
Aif1	0.21332	1.35518	15	0.0099141	1.0104	20
Aif1l	0.32473	1.80869	15	0.14374	1.42473	9
Aifm1	-1.016	6.00978	15	-0.46725	1.33727	9
Aifm2	-0.25184	1.45086	15	-0.197	0.74596	8
Aifm3	-0.070688	0.482158	15	0.048205	0.58603	7
Aig1	0.094818	1.07938	15	-0.95332	1.27391	8
Aim1	0.073632	0.541483	15	-0.016954	0.378336	11
Aim1l	0.33106	1.04821	15	1.4178	1.70333	6
Aim2	-0.1278	0.253265	15	-0.84497	0.705666	4
Aimp1	0.041491	0.758205	15	0.14622	0.771882	11
Aimp2	0.30949	1.02474	15	-0.43044	0.64693	4
Aip	-0.42537	3.17252	15	-3.9299	7.29915	21
Aipl1	0.062293	1.27505	15	-0.45959	0.797076	10
Aire	-0.44887	3.72024	15	0.082456	1.78776	17
Ajap1	0.098248	0.80363	15	-0.56792	1.03988	3
Ajuba	0.63881	7.87199	15	1.7755	6.68537	25
Ak1	0.23619	0.975966	15	-0.32884	0.401801	7
Ak2	-0.21558	0.876606	15	-0.26032	0.613376	9
Ak3	0.28688	1.36837	15	0.059682	1.34798	11
Ak4	0.069249	2.24976	15	0.23639	1.0546	24
Ak5	-0.15506	1.83156	15	-0.060733	0.114034	4
Ak6	-1.9736	14.8934	15	-3.5636	6.91603	13
Ak7	-0.005083	0.628803	15	0.03187	2.04227	19
Ak8	0.23626	1.38081	15	-0.21502	0.34617	17
Ak9	0.07583	1.62077	15	-0.20833	0.577755	6
Akap1	-0.27512	2.84052	15	0.67219	1.58304	14
Akap11	0.18693	1.11676	15	-0.97988	1.62091	7
Akap12	0.053218	1.71901	15	0.55742	0.769551	7
Akap13	0.10712	1.48677	15	-2.729	3.96758	5
Akap14	0.36945	1.04229	15	1.8618	1.96791	6
Akap17b	0.22198	0.941422	15	-0.16297	0.874844	4
Akap2	0.35618	3.03437	9	0.90241	1.69448	5
Akap3	0.30041	2.26528	15	0.9841	1.12943	6
Akap4	0.15496	0.854959	15	0.15832	0.321145	15
Akap5	-0.027942	1.69547	15	-0.046751	0.44619	10
Akap6	0.26369	1.45822	15	-0.26651	1.02761	13
Akap7	0.28192	1.89059	15	0.20809	1.34798	11
Akap8	0.22991	0.966979	15	1.1053	1.25729	9
Akap8l	-0.024253	0.563424	15	-0.21281	0.47401	12
Akap9	0.11649	1.10084	15	0.78673	0.939642	11
Akip1	-0.12682	0.245117	15	0.56222	0.507282	8
Akirin1	0.074485	0.253615	15	0.011057	1.55089	11
Akirin2	-1.7157	11.3997	15	-1.8636	1.97163	3
Akna	-0.20972	0.382937	15	0.52511	0.284908	5
Aknad1	0.12314	0.189223	15	0.40534	0.56441	4
Akp3	0.162	0.708676	15	-0.40763	0.841426	18
Akr1a1	0.25531	1.12977	15	-1.391	1.33854	5
Akr1b10	0.11407	0.739309	15	0.38468	0.884689	4
Akr1b3	-0.45303	3.26188	15	-0.85509	1.81132	18
Akr1b7	-0.024641	0.158315	15	-0.15422	0.6635	8
Akr1b8	0.090701	0.231495	15	0.7909	0.588751	3
Akr1c12	0.2158	0.602512	15	-0.94207	1.06108	6
Akr1c13	0.36236	1.42105	15	0.93023	1.32948	8
Akr1c14	-0.10847	0.216804	15	-0.67762	0.74509	6
Akr1c18	0.25424	1.7684	15	1.4116	1.55914	9
Akr1c19	0.22077	0.506626	15	0.2128	1.24318	11
Akr1c21	0.32704	1.8707	15	0.48617	1.99076	3
Akr1c6	0.13708	1.19356	15	-0.54913	1.19054	18
Akr1cl	-0.28751	1.48315	15	0.12848	0.33831	6
Akr1d1	0.14086	1.12353	15	-0.68142	0.570102	3
Akr1e1	0.052899	0.621184	15	0.10348	1.52554	10
Akr7a5	-0.19268	0.694154	15	-0.60453	0.910095	6
Akt1	-0.5998	3.03068	15	-0.87609	1.4333	11
Akt1s1	0.15338	1.74712	15	-0.36939	0.842302	12
Akt2	-0.0038742	0.970697	15	-0.72431	1.71751	16
Akt3	0.017659	0.951248	15	-0.59369	1.28785	18
Aktip	0.1624	0.978852	15	-1.3214	1.25307	5
Alad	0.18954	1.00662	15	-1.0716	1.85313	8
Alas1	-0.054939	0.276257	15	-0.43044	0.592966	15
Alas2	0.090208	1.9818	15	-0.011293	1.14296	4
Alb	0.30018	1.10373	15	-0.9878	1.36394	9
Alcam	-0.16807	0.868927	15	-3.5622	2.1163	5
Aldh16a1	-0.17085	0.702393	15	0.39459	1.08851	10
Aldh1a1	0.36737	3.50685	15	0.10825	1.64394	10
Aldh1a2	0.29437	2.37578	15	-0.95342	0.826522	5
Aldh1a3	0.57049	4.29553	15	-0.20136	0.540155	4
Aldh1a7	0.02116	1.56972	15	-0.28256	0.370774	7
Aldh1b1	0.14859	1.28707	15	0.21888	1.03474	6
Aldh1l1	-0.1556	2.82944	15	-0.91813	1.3774	14
Aldh1l2	0.17906	0.61055	15	0.72533	0.960903	10
Aldh2	0.093627	0.946154	15	0.60646	2.00346	16
Aldh3a1	0.28039	3.60811	15	-0.79648	0.758728	4
Aldh3a2	0.18108	2.74357	15	-0.1525	0.566935	8
Aldh3b1	-0.031336	2.81172	15	-0.048338	0.651948	9
Aldh3b2	0.037981	1.22027	15	-0.036111	1.18699	5
Aldh4a1	-0.021265	0.330758	15	-0.32556	0.354057	7
Aldh5a1	0.025189	0.507743	15	-0.19706	0.63971	11
Aldh6a1	0.23163	1.94708	15	0.080056	0.624501	13
Aldh7a1	-0.083678	0.15854	15	0.24077	0.761678	18
Aldh8a1	0.49642	2.9227	15	0.26451	0.942676	5
Aldh9a1	-0.036401	0.901149	15	-0.037955	0.15561	4
Aldoa	-4.3958	24.0174	15	-4.598	11.8498	14
Aldoa.2	0.15382	1.63943	15	-0.032621	0.747147	19
Aldoart1	-0.41453	1.55546	15	0.69885	1.86496	14
Aldoart2	-0.066864	0.469186	15	-0.5131	0.635618	6
Aldob	0.051609	0.334738	15	-0.27087	0.35394	9
Aldoc	0.20089	1.48693	15	0.31998	0.938585	6
Alg1	-4.157	24.8633	15	-4.4797	4.62958	7
Alg10b	-0.58088	4.60323	15	-1.1143	1.20271	6
Alg11	-2.1733	13.1505	15	-0.50135	2.21988	3
Alg13	-0.18461	1.11056	15	-1.3545	2.6458	19
Alg14	-2.7388	15.5511	15	-1.8315	3.69607	8
Alg2	-3.553	21.9342	15	-2.5127	1.91905	5
Alg3	0.0056067	2.25788	15	0.53711	0.548874	7
Alg5	-0.72617	4.2461	15	-1.7739	2.14909	9
Alg6	-0.70712	3.35664	15	-0.30284	0.240808	9
Alg8	-0.47309	2.25651	15	-1.2953	1.58791	8
Alg9	-0.016106	1.29662	15	0.89973	0.929814	5
Alk	-0.070489	0.549105	15	-0.037387	0.562123	21
Alkbh1	0.12709	2.22556	15	-0.75302	1.02373	10
Alkbh2	0.18448	1.21062	15	-0.0064245	0.639217	24
Alkbh3	0.13406	2.14655	15	0.011992	0.415714	14
Alkbh4	0.056558	0.550074	15	1.056	1.57996	11
Alkbh5	-0.0072267	0.87296	15	0.15429	0.6066	13
Alkbh6	0.17382	0.809696	15	-0.29484	0.468623	18
Alkbh7	0.3089	2.19273	15	0.84977	0.871536	5
Alkbh8	0.087281	0.588094	15	0.041321	0.819272	7
Allc	0.1952	0.84765	15	0.98536	1.08874	8
Alms1	0.023529	0.189243	15	1.655	2.663	11
Alox12	-0.32286	1.59409	15	-0.0072696	0.325598	14
Alox12b	0.1714	1.43081	15	-0.6716	1.07145	12
Alox15	-0.1564	1.71589	15	1.0232	1.87677	10
Alox5	0.21339	1.06902	15	0.034198	0.238388	7
Alox5ap	0.26402	1.50944	15	0.68441	1.24295	12
Alox8	0.0088255	0.463517	15	1.1029	1.60912	13
Aloxe3	0.33735	1.77464	15	-3.9474	1.82673	3
Alpi	-0.067057	1.85652	15	-0.62802	0.710589	5
Alpk1	-0.016522	2.94627	15	-0.22537	1.39554	5
Alpk2	0.36972	2.03955	15	-0.32559	0.393296	28
Alpk3	0.14148	1.06165	15	-0.18033	0.611047	23
Alpl	0.17389	1.20976	15	-0.42176	1.05252	10
Alppl2	-0.074775	0.916533	15	-0.1404	0.809108	6
Als2	0.038748	0.403898	15	0.50051	0.451058	11
Als2cl	-0.055063	0.337922	15	-0.010786	1.40935	5
Als2cr11	0.13897	0.355926	15	0.27205	0.361331	9
Als2cr12	0.0010558	0.422221	15	-1.0773	0.956245	5
Alx1	0.227	0.653745	15	0.96968	1.15674	5
Alx3	0.011785	0.0585084	15	0.015375	0.344698	12
Alx4	0.12239	0.600136	15	0.50137	0.89449	5
Alyref	-0.93886	6.44558	15	-0.1541	0.34977	6
Alyref2	-0.049324	0.693897	15	0.269	1.3161	8
Amacr	0.013201	0.16549	15	-0.39042	0.632961	7
Ambn	0.043632	0.553836	15	0.32691	0.995421	7
Ambp	-0.221	0.956049	15	0.63092	0.969441	4
Ambra1	1.8429	25.2559	15	4.4119	7.03758	10
Amd1	-0.27701	2.03993	15	-1.5476	1.70408	6
Amdhd1	-0.18394	0.556315	15	2.2385	1.97347	4
Amdhd2	-0.37148	4.19117	15	-0.058882	1.27002	14
Amelx	0.2858	1.5981	15	0.44261	0.363312	8
Amer1	0.060559	0.470878	15	0.55121	0.890253	13
Amer2	-0.043577	2.01694	15	-0.34447	1.05009	10
Amer3	0.43515	2.60043	15	0.26249	0.679459	4
Amfr	-0.23858	1.66991	15	-0.029074	0.291698	10
Amh	0.12252	1.48026	15	-0.32175	0.985479	17
Amhr2	0.02084	0.428827	15	-0.50135	0.63382	9
Amica1	-0.12531	0.661942	15	0.1833	0.215233	14
Amigo1	0.25315	1.09571	15	0.59668	0.693768	11
Amigo2	0.11438	1.11428	15	0.16655	0.732148	20
Amigo3	0.018336	0.641361	15	-0.5035	1.19203	16
Ammecr1	0.38442	1.2857	15	0.7825	1.13209	9
Ammecr1l	-0.072954	0.103777	15	1.7583	2.12682	7
Amn	0.041513	0.486157	15	1.3346	1.8877	13
Amn1	0.19883	0.626775	15	-0.79935	1.4328	9
Amot	0.025428	1.07831	15	0.33853	0.66346	22
Amotl1	-0.021464	0.808298	15	-0.23702	0.41137	8
Amotl2	0.81601	5.99114	15	0.92128	1.72765	9
Ampd1	0.41185	2.18003	15	0.59746	1.19719	7
Ampd2	0.1649	0.801893	15	0.71799	1.01321	6
Amph	0.094605	0.976213	15	-0.13293	1.33538	5
Amt	0.14225	1.30441	15	-0.81947	1.02829	11
Amtn	-0.29759	1.84539	15	1.1848	0.950743	4
Amy1	0.34189	1.53454	15	0.048205	0.335245	3
Amy2a2	-0.11782	0.785872	15	0.87071	1.38219	8
Amy2a3	-0.84951	4.38316	15	-1.3555	1.50899	5
Amy2a4	-0.72725	2.47705	15	-1.4084	1.85592	5
Amy2a5	-1.4341	7.99085	15	-3.501	2.61892	5
Amy2b	-0.02176	0.343423	15	0.3803	0.239947	5
Amz1	0.030583	1.31148	15	-0.036599	1.47623	8
Amz2	0.10896	1.74302	15	-0.5949	0.792608	4
Anapc1	-3.4713	19.1887	15	-1.3932	2.69841	6
Anapc10	-1.7375	11.3686	15	-1.7514	2.55527	10
Anapc11	-3.1727	19.6939	15	-4.7459	5.15898	6
Anapc13	-0.63045	4.51657	15	-0.2698	0.749019	13
Anapc15	-0.58881	3.75848	15	1.2723	0.94401	4
Anapc16	-0.020882	0.471675	15	0.8229	1.28048	10
Anapc2	-2.8267	14.7471	15	-2.8266	4.80443	12
Anapc4	-1.6797	13.4561	15	-1.6389	2.46136	11
Anapc5	-2.7182	14.4926	15	-0.84873	1.81051	8
Anapc7	0.041592	0.577312	15	0.15415	0.120606	29
Ancv1r	0.12363	1.22521	15	0.16548	0.578264	8
Ang	0.040358	0.511548	15	-0.26744	1.05593	17
Ang4	0.33065	1.11198	15	-0.09445	0.11285	8
Ang5	0.2652	1.03932	15	0.11448	0.369552	3
Ang6	0.31832	1.15592	15	-0.14431	0.266482	7
Angel1	0.043459	1.08641	15	0.60384	0.624757	12
Angel2	0.33992	2.66847	15	-0.16028	1.40685	10
Angpt1	0.11287	1.04648	15	-0.094216	0.501579	9
Angpt2	-0.035963	1.00343	15	-0.015882	0.996496	12
Angpt4	0.10053	0.190043	15	0.25835	1.41758	11
Angptl1	0.095099	0.824025	15	0.63834	1.4471	9
Angptl2	0.008815	1.80643	15	-0.33648	1.47125	6
Angptl3	0.24662	1.10091	15	-0.42022	0.677988	5
Angptl4	0.32191	1.65791	15	0.34257	0.925805	12
Angptl6	-0.20572	0.905669	15	-0.52801	1.13031	6
Angptl7	-0.25333	1.14894	15	-0.38308	0.980551	4
Ank	-0.078849	0.665788	15	1.4586	1.59331	8
Ank1	0.34075	2.63093	15	0.055541	0.219445	18
Ank2	0.45937	2.66001	15	0.38754	0.365029	5
Ank3	-0.060539	0.33711	15	0.69209	1.27368	11
Ankar	-0.052935	0.80813	15	0.37982	0.564044	19
Ankdd1a	0.15509	0.613323	15	1.1306	1.21404	6
Ankdd1b	0.20351	2.30035	15	0.22998	1.66027	10
Ankef1	0.02316	0.256294	15	-0.59552	2.19684	11
Ankfn1	-0.056021	0.378408	9	0.69264	0.792689	6
Ankfy1	0.34407	2.38283	15	0.31845	1.57323	22
Ankhd1	0.26138	1.00738	15	-0.032486	0.6634	10
Ankib1	0.037472	0.219316	15	0.12875	2.26225	11
Ankk1	0.27367	1.41696	15	0.38312	0.950317	10
Ankle1	0.072042	0.374153	15	1.1739	1.12161	7
Ankmy1	-0.13348	0.616957	15	0.24017	0.487276	8
Ankmy2	0.45157	2.25943	15	-0.13056	1.1359	8
Ankra2	-0.13269	0.554785	15	0.20374	0.388723	14
Ankrd1	0.27347	0.885022	15	-0.13106	0.544151	8
Ankrd10	0.38082	2.71323	15	0.50936	0.873576	9
Ankrd12	0.040576	0.377724	15	1.0926	1.39514	8
Ankrd13a	-0.010263	0.918041	15	0.22846	1.30281	4
Ankrd13b	0.10603	1.3683	15	-0.3217	0.631825	6
Ankrd13c	0.14981	0.657735	15	-0.2492	0.466902	3
Ankrd13d	0.15588	2.46646	15	0.48072	0.77963	7
Ankrd16	-0.026857	0.443071	15	1.4011	2.13869	5
Ankrd17	-0.36701	2.1834	15	-2.0563	2.81023	4
Ankrd2	0.060563	0.66282	15	-0.28427	1.01618	3
Ankrd22	0.12511	0.749604	15	-0.63944	0.70082	7
Ankrd23	0.097283	0.785739	15	-0.6314	0.715186	6
Ankrd24	0.15936	0.658585	15	-0.54909	0.810313	3
Ankrd26	-0.07434	0.306554	15	-0.76558	1.01178	6
Ankrd27	0.099326	0.658328	15	-1.3265	1.86557	5
Ankrd28	0.19244	0.700101	15	-0.3461	0.267453	3
Ankrd29	0.21007	0.35086	15	0.16894	0.965572	6
Ankrd31	0.035768	0.360942	12	0.070777	0.144929	7
Ankrd32	0.044334	0.391431	15	0.84129	0.890556	6
Ankrd33	0.39545	1.21089	15	0.29101	0.320908	4
Ankrd33b	0.19369	0.758454	15	0.10515	0.444555	9
Ankrd34a	-0.019518	0.0998405	15	1.3385	1.04382	3
Ankrd34b	0.11223	0.617497	15	-0.61494	2.27133	4
Ankrd34c	0.14856	1.15707	15	0.80271	0.865759	3
Ankrd35	0.0066417	0.261243	15	0.80678	1.60411	8
Ankrd36	-0.0082959	1.2599	15	0.21064	0.493211	7
Ankrd37	0.26214	0.68424	15	0.26405	0.531535	7
Ankrd39	0.19502	0.860845	15	0.70865	0.663981	5
Ankrd40	-0.7044	2.81927	15	-1.8154	2.39674	7
Ankrd42	-0.05891	0.482131	15	-0.44207	0.2851	5
Ankrd45	0.29903	1.55006	15	-0.1962	0.299911	7
Ankrd46	0.20943	1.67621	15	-1.0285	1.15807	4
Ankrd49	-0.93391	4.52754	15	-0.64504	0.862171	3
Ankrd50	-0.044039	0.654509	15	-0.61167	0.697626	6
Ankrd52	-0.26965	0.792285	15	-0.54074	0.854027	10
Ankrd53	-0.15531	0.989742	15	2.5062	2.38792	4
Ankrd54	0.011151	0.25689	15	0.72494	1.017	13
Ankrd55	0.078388	0.693983	15	1.5522	1.15096	4
Ankrd6	-0.079669	1.0787	15	0.27284	0.293504	6
Ankrd60	0.22242	1.1186	15	-0.2154	0.428722	4
Ankrd61	-0.15135	0.636689	15	0.075653	1.2053	13
Ankrd63	0.48917	2.05906	15	-0.44637	0.349081	5
Ankrd65	0.10871	0.0810946	15	0.44392	0.687294	6
Ankrd66	0.36521	0.873544	15	0.2996	0.626959	4
Ankrd7	0.013451	0.351796	15	-0.20316	1.32454	15
Ankrd9	0.31199	2.00574	15	0.1507	0.901218	17
Anks1	0.20262	0.830355	15	1.0822	1.07735	5
Anks1b	0.043175	0.378035	15	-0.4309	0.963012	10
Anks3	-0.32423	1.59729	15	0.34146	0.275822	8
Anks4b	0.12417	0.677843	15	-0.54296	0.50826	7
Anks6	-0.01416	0.27579	15	-0.61744	0.62932	5
Ankub1	-0.28836	1.10766	15	-0.010048	0.316989	3
Ankzf1	0.48544	1.67381	15	-0.045924	0.31608	7
Ano1	0.19015	1.04132	15	-0.50777	1.21149	17
Ano10	0.39642	2.2662	15	-0.069882	0.917538	6
Ano2	0.063435	0.171837	15	-0.65357	0.981175	8
Ano3	0.072762	0.35295	15	0.091202	0.364878	11
Ano4	0.18634	2.9415	15	-0.67246	0.422301	4
Ano5	0.039131	0.378543	15	0.45548	0.478692	5
Ano6	0.51418	2.32509	15	-0.021075	0.470775	4
Ano7	0.080851	0.731352	15	0.016564	1.41568	18
Ano8	0.40297	3.14973	15	0.52372	1.76525	7
Ano9	0.042444	0.469071	15	0.65871	1.13494	9
Anp32a	0.13127	0.336516	15	0.10332	0.998569	6
Anp32b	0.17804	0.336987	15	0.641	1.53165	3
Anp32e	-0.29174	1.1036	15	0.050221	0.359409	9
Anpep	-0.13322	1.26305	15	-0.91728	0.921326	7
Antxr1	0.18025	0.875985	15	0.32385	0.17793	10
Antxr2	0.037461	1.17183	15	0.65199	0.594056	8
Antxrl	0.1735	2.18998	15	-0.16093	0.149679	10
Anxa1	0.49697	5.90149	15	0.4076	0.561205	16
Anxa10	0.2193	0.882994	15	1.1028	2.29829	14
Anxa11	0.010655	0.472112	15	-0.046097	0.344506	15
Anxa13	0.033126	0.307753	15	0.17461	0.446481	13
Anxa2	0.36519	1.88065	15	0.60704	1.10985	15
Anxa3	0.050732	0.625673	15	0.028671	0.786987	16
Anxa4	0.26957	1.36433	15	-0.072901	0.440584	23
Anxa5	0.4814	4.07822	15	0.042671	0.638688	20
Anxa6	0.63119	2.24485	15	-0.19552	2.10037	3
Anxa7	-0.071392	0.0666595	15	0.20883	0.636219	14
Anxa8	0.27139	2.05344	15	0.62702	0.890354	12
Anxa9	-0.12729	0.591726	15	-1.1508	1.08763	7
Aoah	-0.20446	1.14153	15	0.16268	0.444084	7
Aoc1	0.18632	1.14119	15	0.67255	0.635449	5
Aoc2	-0.34354	1.86341	15	-0.62574	0.845759	11
Aoc3	0.15438	0.623387	15	0.35055	0.683652	8
Aox1	0.32004	1.49478	15	-0.020216	0.210984	6
Aox2	-0.14266	0.260167	15	0.64786	0.74177	9
Aox3	0.14147	0.715141	15	0.26604	0.829298	8
Aox4	0.16094	0.933488	15	0.67307	1.06346	5
Ap1ar	0.21459	0.425043	15	-0.064082	0.0805976	5
Ap1b1	0.4104	4.7601	15	0.0073581	1.05766	9
Ap1g1	-0.058134	0.848998	15	-0.13868	0.796559	3
Ap1g2	0.18932	1.11336	15	-0.45693	1.32752	12
Ap1m1	-0.16815	1.33694	15	-0.54153	0.478352	4
Ap1m2	-0.10773	1.18421	15	-1.0756	1.14269	4
Ap1s1	0.62057	5.21523	15	-0.34069	0.334926	5
Ap1s2	0.51563	2.99905	15	0.11131	0.293743	7
Ap2a1	0.4075	2.68196	15	0.37366	1.20483	8
Ap2a2	-0.15089	1.21053	15	-0.4608	2.90935	13
Ap2b1	-0.61624	4.96666	15	-0.32707	0.79366	9
Ap2m1	-1.1939	8.63281	15	-1.1723	1.47125	6
Ap2s1	-1.4855	6.68077	15	0.10161	1.11069	6
Ap3b1	-0.20838	0.89262	15	0.44577	1.37855	9
Ap3b2	0.16829	0.852076	15	-0.83136	0.984556	9
Ap3d1	-0.25344	2.13873	15	-0.22301	0.621947	10
Ap3m1	0.18932	1.31498	15	0.044883	0.313185	5
Ap3m2	0.0077508	1.90483	15	1.1295	0.777518	3
Ap3s1	0.03103	1.36188	15	0.91999	1.14219	6
Ap3s2	0.42456	2.03312	15	0.59668	0.864613	11
Ap4b1	0.18737	0.781622	15	-1.7744	1.23459	4
Ap4e1	0.055824	0.631137	15	1.3975	1.41554	7
Ap4m1	0.29203	1.45773	15	0.17522	0.349071	6
Ap4s1	0.1898	1.15544	15	0.35234	0.88399	4
Ap5b1	0.38817	1.48137	15	0.085787	0.912538	6
Ap5m1	0.39716	2.2285	15	2.1847	2.70715	8
Ap5s1	0.11855	1.1086	15	-0.74037	1.17447	12
Ap5z1	0.18805	1.3436	15	0.68705	0.696048	3
Apaf1	0.30812	1.95809	15	-0.13534	0.798057	12
Apba1	0.11982	1.18517	15	0.32663	0.706041	8
Apba2	0.28295	0.959516	15	-0.42776	0.495529	6
Apba3	0.15313	0.949118	15	0.50241	0.833985	10
Apbb1	-0.0063992	1.19751	15	-0.26179	0.801673	13
Apbb1ip	0.34743	2.34744	15	-0.55615	0.951248	14
Apbb2	0.21644	0.237577	15	0.71944	0.498051	4
Apc	0.13367	0.782858	15	-0.15184	0.708698	17
Apc2	-0.05276	0.651325	15	0.46657	1.39751	11
Apcdd1	0.0036098	0.808717	15	0.18774	0.701016	8
Apcs	0.022927	1.15311	15	0.70332	1.03843	15
Apeh	0.026585	0.527478	15	-0.37585	1.31042	13
Apela	0.05419	0.429154	15	-0.45121	0.920891	5
Apex1	-0.49887	3.34427	15	0.24208	0.595286	10
Apex2	-0.27605	2.14952	15	-0.17216	1.01149	11
Aph1a	-0.037438	0.380708	15	0.56811	0.696394	10
Aph1b	0.17548	0.852633	15	0.74674	1.46189	15
Aph1c	-0.13822	0.202947	15	0.78259	1.13542	4
Api5	-0.33409	0.791209	15	0.070529	0.361092	6
Apip	0.039131	1.3718	15	-1.1254	1.38034	8
Apitd1	0.044822	0.386348	15	0.053738	1.62102	11
Aplf	-0.096327	0.392245	15	-0.1007	0.643362	20
Apln	0.06639	1.85109	15	-0.017093	0.765939	11
Aplnr	-0.31107	1.58271	15	1.574	1.6216	6
Aplp1	-0.18759	0.470582	15	1.0412	1.52181	11
Aplp2	-0.044255	0.699578	15	1.0851	2.04106	14
Apmap	0.085689	0.821743	15	-0.20723	1.46464	6
Apoa1	0.11018	0.820563	15	0.59746	0.877522	15
Apoa1bp	0.30481	1.90728	15	-0.7322	1.55685	9
Apoa2	0.46673	2.61685	15	0.30765	0.772988	9
Apoa4	0.1196	1.03404	15	0.3275	0.363432	8
Apoa5	0.11116	0.539448	15	0.13107	0.636012	6
Apob	0.14832	1.58642	15	-0.86963	1.02364	9
Apobec1	0.069019	2.50216	15	-0.37786	0.762733	13
Apobec2	0.066181	1.18641	15	-0.43497	0.910201	14
Apobec3	0.26285	3.28383	15	0.5284	1.08345	14
Apobec4	0.23788	1.34531	15	0.35865	1.7199	12
Apobr	0.33113	2.07672	15	1.0643	1.06787	7
Apoc1	0.25814	1.42824	15	0.13075	1.56128	9
Apoc2	0.31112	1.78901	15	1.2112	2.08357	9
Apoc3	0.13855	1.15777	15	-0.056786	0.790003	10
Apoc4	-0.14407	1.0248	15	0.012322	1.14234	7
Apod	0.40345	3.03899	15	1.2992	1.18883	6
Apoe	0.1665	0.965091	15	0.087396	2.1201	17
Apof	0.50879	3.939	15	0.29918	1.49314	10
Apoh	-0.10823	0.537857	15	-1.3714	2.45866	8
Apol10a	-0.11152	0.770446	15	-0.51652	0.854959	5
Apol10b	0.21338	0.654665	15	0.92809	1.09821	6
Apol11a	0.3817	1.86271	15	3.2538	2.14644	5
Apol11b	0.31229	1.19882	15	-0.13088	0.677037	8
Apol6	-0.044644	0.851212	15	-0.52169	0.73058	4
Apol7a	0.29907	1.72644	15	-0.12759	0.618903	11
Apol7b	-0.21241	0.847528	15	0.90653	1.59365	10
Apol7c	-0.079498	0.921616	15	1.0235	1.25142	11
Apol7e	-0.044395	1.42946	15	0.5486	1.83103	7
Apol8	0.15754	0.919987	15	-0.4174	0.926062	17
Apol9a	0.31021	1.08085	15	0.16759	1.23365	7
Apol9b	0.15906	0.111613	15	0.088852	0.379614	7
Apold1	0.02802	0.805624	15	2.4082	1.59373	4
Apom	0.38118	2.31535	15	-1.9414	1.47026	4
Apon	0.18761	0.842302	15	-0.83529	0.794146	5
Apoo	0.19078	0.571282	15	-2.841	1.66184	4
Apoo-ps	-0.044562	1.00339	15	1.955	2.19454	3
Apool	0.37098	1.47463	15	0.62396	0.6674	6
Apopt1	0.10969	0.581318	15	1.0387	1.26659	4
App	0.3014	1.82215	15	0.43612	0.455622	6
Appbp2	0.0017197	1.11374	15	-0.77805	1.15858	10
Appl1	0.13206	0.335236	15	0.61922	0.9049	12
Appl2	0.25345	1.30384	15	0.16426	0.792419	15
Aprt	-0.2014	1.20876	15	-1.2202	3.33006	18
Aptx	0.23399	1.18467	15	0.081247	1.24355	15
Aqp1	0.16759	1.08023	15	-0.14067	0.580077	11
Aqp11	0.35563	1.55301	15	1.5736	1.48167	7
Aqp12	-0.22064	1.0176	15	-1.011	2.20439	7
Aqp2	0.18314	1.21422	15	-0.40912	0.970738	10
Aqp3	0.23185	1.20689	15	0.28718	0.610745	7
Aqp4	0.015606	0.671661	15	-0.61868	0.748946	7
Aqp5	0.13941	1.4081	15	0.37696	0.405751	7
Aqp6	0.22945	1.45411	15	1.1531	1.50026	8
Aqp7	-0.0023963	1.07601	15	-0.41092	0.952569	11
Aqp8	0.10783	0.937042	15	0.044509	0.656119	12
Aqp9	0.32244	1.78869	15	-0.13314	0.282454	11
Aqr	-2.6029	12.978	15	-1.2912	1.86954	10
Ar	-0.077097	1.05758	15	0.058232	0.808046	14
Araf	0.22241	1.16052	15	0.4333	0.75429	14
Arap1	0.14152	0.542012	15	-0.35711	0.815678	7
Arap2	-0.063655	0.536899	15	0.31699	0.551016	6
Arap3	0.10979	1.41904	15	-0.14681	1.05003	17
Arc	0.12846	0.743427	15	-0.89001	1.61183	15
Arcn1	-2.5718	16.1396	15	-1.8359	3.64331	9
Areg	-0.18932	1.27091	15	0.54203	1.69836	16
Arel1	0.18247	1.00834	15	0.39354	0.824401	14
Arf1	-0.30227	1.50295	15	2.9194	2.92412	6
Arf2	0.24531	1.33886	15	1.1958	1.76288	5
Arf3	0.20726	1.52018	15	-1.1903	2.37124	13
Arf4	-1.8534	14.0031	15	-0.11436	1.04662	7
Arf5	-0.12023	0.301795	15	0.77538	0.657262	4
Arf6	-0.17748	1.051	15	-0.56639	1.07307	13
Arfgap1	0.20815	1.79218	15	1.17	1.23567	4
Arfgap2	-0.25542	1.27572	15	-0.028158	1.09855	5
Arfgap3	-0.16033	0.244018	15	0.92256	1.2823	6
Arfgef1	-0.1599	1.01423	15	0.30487	2.46126	15
Arfgef2	0.037613	1.37494	15	-0.16272	1.00187	10
Arfgef3	0.15753	1.02785	15	0.0038944	0.412154	5
Arfip1	0.11088	0.451279	15	0.89592	0.908087	6
Arfip2	-0.13203	0.175094	15	-0.52244	0.433339	4
Arfrp1	-1.5803	5.69276	15	-3.1124	2.38678	4
Arg1	0.32389	2.79604	15	0.54568	0.912716	14
Arg2	-0.070486	1.47049	15	0.08419	0.700101	13
Arhgap1	-0.001391	0.729461	15	0.3391	0.833985	10
Arhgap10	-0.20249	1.31904	15	-1.5737	1.54176	6
Arhgap11a	0.045678	0.158228	15	0.24029	1.33726	3
Arhgap12	0.33106	1.2385	15	0.93141	1.41073	9
Arhgap15	0.28182	1.61105	15	0.77344	0.622512	4
Arhgap17	-0.0099234	1.16371	15	-0.1339	0.756317	11
Arhgap18	0.084157	0.757012	15	-0.40021	0.696048	3
Arhgap19	0.23204	0.606881	15	2.1813	2.30777	9
Arhgap21	0.74435	8.71765	15	0.72254	1.1208	12
Arhgap22	0.27884	1.37499	15	-0.28567	0.38146	11
Arhgap23	0.2833	2.85574	15	-0.064648	0.334194	5
Arhgap24	0.082639	1.07221	15	0.61256	1.42162	3
Arhgap25	-0.09029	0.646161	15	0.39687	2.02808	4
Arhgap26	0.11252	0.58603	27	0.32334	1.75439	12
Arhgap27	-0.0012773	0.760275	15	-0.33336	0.641019	10
Arhgap28	0.20657	2.29738	15	1.1352	1.17936	6
Arhgap29	0.32841	1.0729	15	0.94821	1.37307	9
Arhgap30	0.22224	0.479608	15	1.0881	1.83425	9
Arhgap31	0.35313	1.39215	15	1.7536	1.84375	6
Arhgap32	-0.20884	0.593375	15	0.38109	2.79215	4
Arhgap33	-0.2203	0.477087	15	-0.40731	0.541574	8
Arhgap33os	0.28324	1.29235	15	2.4708	1.91941	5
Arhgap35	0.86993	6.18259	15	1.1296	0.950162	5
Arhgap36	0.22655	1.22196	15	-0.25291	2.81613	12
Arhgap39	0.007893	0.788586	15	-0.91315	1.8231	8
Arhgap4	0.18449	0.553525	15	0.028315	0.670704	7
Arhgap40	0.18833	0.736648	15	0.56523	0.803713	5
Arhgap42	0.33245	1.09123	15	-0.25729	0.695251	5
Arhgap44	-0.11452	0.539388	15	1.4621	0.894388	3
Arhgap5	-0.37339	1.73705	15	0.090621	0.911864	7
Arhgap6	0.31756	1.34213	15	0.78367	1.867	7
Arhgap8	0.15934	0.328809	15	1.5983	1.09388	4
Arhgap9	0.33356	0.839291	15	0.13966	0.142468	3
Arhgdia	0.15777	0.94424	15	0.9747	0.72455	3
Arhgdib	0.36177	2.68846	15	4.2134	3.42352	5
Arhgdig	0.19718	0.325911	15	0.071615	0.390331	5
Arhgef1	-0.049775	0.440405	15	0.10722	0.799067	9
Arhgef10	0.070599	0.811268	15	0.95611	1.30093	11
Arhgef10l	0.16141	0.83654	15	0.35452	0.45917	6
Arhgef11	-0.35851	2.29542	15	-1.0483	1.37388	8
Arhgef12	-0.66921	6.15037	15	0.16926	0.694305	22
Arhgef15	0.0089346	0.112703	15	0.42884	0.45134	4
Arhgef16	0.30583	1.15171	15	0.52016	0.541015	7
Arhgef17	0.27867	0.841788	15	0.95067	0.672641	3
Arhgef18	-0.28596	0.868702	9	1.9749	1.43773	4
Arhgef2	-0.42803	2.60518	15	0.17283	1.60861	24
Arhgef25	0.34562	3.51411	15	0.4917	0.888872	8
Arhgef26	-0.36781	1.87723	15	-0.34217	1.42175	7
Arhgef28	0.30618	1.89575	15	-0.81279	0.879459	5
Arhgef3	0.19182	0.388712	15	0.82371	0.877162	4
Arhgef33	0.22459	0.366542	15	1.123	2.13272	7
Arhgef37	0.11241	0.284716	15	0.09979	0.510998	3
Arhgef38	0.37445	1.24337	15	1.5928	1.70686	6
Arhgef39	-0.059055	1.27067	15	-0.24768	0.682354	13
Arhgef4	0.1894	1.6652	15	-0.081721	1.0303	9
Arhgef4.2	0.27732	1.77516	15	0.23951	0.696869	12
Arhgef40	-0.13571	0.481684	15	-0.24613	1.83422	9
Arhgef5	-0.40753	2.00447	15	0.10644	1.72707	7
Arhgef6	-0.040928	1.65823	15	-0.8937	1.41018	12
Arhgef7	-1.2253	8.44647	15	-0.75239	1.40035	15
Arhgef9	0.32591	1.14068	15	-0.21139	0.650353	6
Arid1a	0.62467	6.97761	15	0.70653	1.71847	13
Arid1b	0.15173	0.735135	15	0.45754	1.42871	11
Arid2	-0.25844	0.752419	15	-0.78437	1.51935	7
Arid3a	0.03446	0.158165	15	1.3304	1.40936	9
Arid3b	0.12562	0.575363	15	0.56701	0.443927	9
Arid3c	0.1632	0.598755	15	-0.43832	0.398222	4
Arid4a	-0.35706	2.3812	15	0.18902	1.02126	11
Arid4b	-0.18037	0.517469	15	-0.5099	0.716948	5
Arid5a	0.22612	0.521102	15	0.26637	1.00245	11
Arid5b	-0.23703	0.287763	15	0.92311	0.971836	4
Arih1	-1.2787	11.5646	15	2.1593	4.90181	17
Arih2	0.60518	7.34055	15	-0.25613	0.378803	8
Arl1	-1.3828	7.07183	15	-2.2294	2.79705	6
Arl10	0.2243	1.45282	15	0.74028	1.0679	7
Arl11	0.48903	2.31662	15	1.0007	2.00044	8
Arl13a	0.35343	1.91984	15	1.3939	2.30537	4
Arl13b	-0.03931	0.534766	15	-0.6004	0.67776	7
Arl14	0.11545	0.597171	15	-0.24906	0.381952	4
Arl14ep	0.18721	0.412581	15	-0.99861	0.69037	4
Arl14epl	-0.18437	0.980468	15	0.95718	0.798794	5
Arl15	0.32275	1.13828	15	1.4661	1.14622	5
Arl16	0.08906	0.455126	15	0.38993	0.522387	4
Arl2	-2.4235	10.1045	15	-5.4349	2.28708	3
Arl2bp	0.14313	0.351416	15	0.68918	0.916928	5
Arl3	0.19324	2.17321	15	-0.12534	0.421705	11
Arl4a	-0.084278	0.661583	15	0.24483	0.413165	16
Arl4c	0.20859	0.91682	15	-1.0696	0.855893	4
Arl4d	0.45169	3.28487	15	-0.93156	1.74311	14
Arl5a	0.19104	1.26263	15	-0.22856	0.255113	6
Arl5b	0.048119	0.904447	15	-0.7913	1.13631	5
Arl5c	0.3654	1.55126	15	0.99049	1.42067	6
Arl6	-0.038853	0.393189	15	-0.55221	0.802637	9
Arl6ip1	0.048565	0.645603	15	-0.013103	1.40685	10
Arl6ip4	0.10275	0.590422	15	-0.036453	1.17491	4
Arl6ip5	0.18479	0.97786	15	0.37161	0.618289	6
Arl6ip6	-0.043392	0.391046	15	-0.42362	0.527024	16
Arl8a	0.22145	1.50489	15	-0.65857	0.948346	9
Arl8b	-0.11925	0.506054	15	-0.68418	1.34346	10
Arl9	0.0038412	0.190669	15	-4.6193	2.66997	4
Armc1	0.073073	0.347164	15	0.57003	1.23538	7
Armc10	-0.093982	0.677037	15	0.25589	0.695962	9
Armc12	0.34961	1.25459	15	0.754	1.61234	7
Armc2	0.03446	0.305018	15	0.070489	1.69825	10
Armc3	0.014256	0.518185	15	0.4919	0.453704	6
Armc4	0.11048	0.825911	15	1.0222	1.58429	10
Armc5	-0.65117	4.1094	15	-0.31406	0.572563	12
Armc6	0.0016721	0.45872	15	-0.25726	0.608888	3
Armc7	-2.7538	13.2962	15	-3.986	3.3748	8
Armc8	0.1556	0.553137	15	0.13237	0.404768	10
Armc9	0.02316	0.231103	15	-0.30967	0.168265	3
Armcx1	0.16606	1.59339	15	-0.57184	0.777596	6
Armcx2	0.1037	0.596862	15	0.12405	0.447295	11
Armcx3	-0.1787	0.519576	15	1.1546	1.575	7
Armcx4	0.20719	0.402118	15	0.38729	0.888536	7
Armcx5	0.32478	1.4187	15	-0.21491	0.455349	7
Armcx6	0.41075	2.83699	15	0.84881	1.21295	8
Armh2	0.16	0.378938	15	0.39729	0.125611	7
Armt1	-0.047137	0.340065	15	0.41261	0.807293	6
Arnt	0.60643	8.67807	15	3.8228	7.77689	17
Arnt2	0.1373	2.74878	15	0.9367	2.78225	16
Arntl	-0.30949	3.23538	15	-0.33022	1.1924	17
Arntl2	0.018749	0.617803	15	-0.27929	0.614751	7
Arpc1a	-0.29229	1.26496	15	3.1005	2.43107	3
Arpc1b	-0.12714	1.04921	15	-0.72605	1.95558	19
Arpc2	-1.4533	7.64233	15	-1.2884	1.74926	3
Arpc3	-1.6288	11.0539	15	-0.096703	0.817671	13
Arpc4	-2.2798	11.0413	15	-0.7955	1.57517	13
Arpc5	-0.70547	3.98966	15	1.0687	1.26398	5
Arpc5l	-0.78207	2.07215	15	-0.34409	0.0757311	5
Arpp19	-0.53414	2.42282	15	-1.9616	1.53411	6
Arpp21	0.21534	0.775648	15	0.25354	0.937493	11
Arr3	0.050441	0.335367	15	1.3381	1.2157	7
Arrb1	0.11057	0.872701	15	0.053689	0.896265	18
Arrb2	-0.15256	2.4915	15	-0.73544	0.860971	8
Arrdc1	0.086914	0.547018	15	0.22323	0.086202	3
Arrdc2	0.087519	0.490609	15	0.97294	1.73363	7
Arrdc3	0.61694	4.71611	15	-0.42816	1.02367	5
Arrdc4	0.18828	1.54209	15	0.0089883	0.774484	7
Arrdc5	-0.066605	0.0791257	15	-0.43765	0.823735	10
Arsa	0.1193	0.766623	15	0.14473	0.839712	8
Arsg	-0.32682	1.28329	15	-0.12688	0.586064	7
Arsi	-0.073572	1.01027	15	-1.0395	1.08418	5
Arsj	-0.051684	0.967301	15	2.1088	1.59752	4
Arsk	0.13625	0.585762	15	1.493	2.41223	9
Art1	-0.018556	0.968915	15	0.12331	0.0690968	13
Art2a-ps	0.30041	1.17115	15	0.2329	0.354617	3
Art2b	0.27769	2.18589	15	-1.8576	1.68023	7
Art3	0.1009	1.48504	15	0.709	0.846155	6
Art4	0.2019	0.985605	15	0.32203	0.960903	14
Art5	0.1548	2.00157	15	0.2395	0.397051	4
Artn	-0.10192	0.794254	15	-0.16284	0.583759	14
Arv1	0.56687	3.56669	15	-0.33698	1.3942	7
Arvcf	0.030599	0.36236	15	-0.30588	0.993662	9
Arx	0.14251	0.49065	15	0.81748	2.00452	9
Arxes1	-0.23019	0.581964	15	0.3353	0.592049	6
Arxes2	-0.29796	0.607426	15	0.1422	0.441088	6
As3mt	0.22431	1.85066	15	0.69024	0.771292	9
Asah1	0.14619	0.819043	15	-0.59552	0.900216	11
Asah2	0.015111	0.98051	15	0.36721	0.505025	15
Asap1	-0.1314	0.837974	15	-1.2945	5.41638	50
Asap2	-0.0047198	0.595269	15	0.47297	0.96429	9
Asap3	-0.01881	0.113171	15	-0.53867	1.13533	12
Asb1	0.18477	0.99123	15	0.24955	0.918041	17
Asb10	0.1037	0.517755	15	-0.19778	0.177198	15
Asb11	-0.0061704	0.617857	15	-0.7401	0.969441	4
Asb12	0.22549	2.10404	15	-0.00076465	0.342571	19
Asb13	0.24701	1.59941	12	-0.61099	2.98101	6
Asb14	0.28614	1.30148	15	0.42134	1.04216	8
Asb15	-0.40948	2.43786	15	-0.4028	0.558729	14
Asb16	-0.00041177	1.05937	15	0.073614	0.0966495	5
Asb17	0.094079	1.24314	15	-0.59745	1.69592	7
Asb18	-0.092066	1.06159	15	-0.13095	0.158716	7
Asb2	0.20609	1.68651	15	1.129	1.69364	13
Asb3	0.12961	0.307629	15	-0.036504	0.277819	15
Asb4	0.015471	0.279493	15	1.0027	1.88995	16
Asb5	0.37042	3.05552	15	0.66714	1.01288	10
Asb6	0.66209	7.95125	15	0.0056455	0.490569	22
Asb7	0.31403	1.94393	15	-0.4763	1.86331	13
Asb8	0.33706	2.87099	15	-0.60394	1.31536	11
Asb9	0.30386	2.66936	15	0.29531	1.89994	16
Ascc1	-0.011486	0.351523	15	0.12344	0.464377	3
Ascc2	-0.061123	0.443963	15	-0.011809	1.01341	5
Ascc3	-1.8049	12.9539	15	-1.4482	2.13517	6
Ascl1	-0.015475	0.614716	15	1.4514	1.69988	8
Ascl2	0.36193	1.41909	15	0.34735	0.568395	11
Ascl3	0.17315	0.591896	15	-0.17043	0.717151	9
Ascl4	0.16183	1.11822	15	1.1112	1.23782	4
Ascl5	0.24506	0.650684	15	0.94202	1.00097	6
Asdurf	0.14963	0.613983	15	-0.091603	0.956166	6
Asf1a	0.15274	0.562868	15	-1.1513	2.52781	13
Asf1b	-0.075832	0.444748	15	0.14015	0.452459	7
Asgr1	-0.19176	0.666593	15	-0.098141	1.19583	13
Asgr2	0.16406	1.30165	15	0.082361	1.2251	9
Ash1l	-0.21956	1.70715	15	-0.15218	0.785262	11
Ash2l	-1.9975	19.6231	15	-2.3979	3.79496	11
Asic1	0.21843	1.07886	15	-0.72455	1.10282	15
Asic2	0.074441	0.800848	15	-1.1997	1.2186	3
Asic3	0.023863	1.1219	15	0.24563	0.475253	10
Asic4	0.14974	0.813835	15	0.74335	0.884589	8
Asic5	0.10318	1.1869	15	0.7909	0.765483	7
Asl	0.10805	0.80799	15	-1.3991	1.81177	12
Asmt	0.31891	3.42806	15	0.71279	0.825998	10
Asna1	-1.6667	9.50252	15	-3.1508	3.79899	8
Asns	-0.1882	0.343653	15	-1.3051	1.14142	5
Asnsd1	-0.10588	1.28895	15	0.30911	0.381816	6
Aspa	0.10137	1.00865	15	-0.016032	0.785607	17
Aspdh	-0.17118	1.53456	15	2.1266	2.30569	8
Aspg	0.4718	2.73852	15	-1.1638	1.3808	7
Asph	0.18024	1.19899	15	0.36086	0.732993	20
Asphd2	-0.16268	0.568363	15	-0.86047	0.754389	4
Aspm	-0.19358	0.442373	15	1.048	0.988091	5
Aspn	0.17162	1.93892	15	-0.18827	0.766902	5
Asprv1	-0.042156	2.07622	15	-0.14334	0.641209	9
Aspscr1	0.12232	1.17888	15	0.2118	0.589678	14
Asrgl1	0.0073837	0.651442	15	1.5269	1.99827	7
Ass1	0.17561	1.25305	15	-0.50135	1.44529	17
Aste1	0.044242	0.339362	15	0.21062	0.529046	8
Astl	0.05549	1.2055	15	-0.32938	0.855893	4
Astn1	0.10981	0.940323	15	-0.22999	0.822377	9
Astn2	0.01836	1.91664	15	0.0050455	0.564092	9
Asun	-0.61786	2.30021	15	-1.3085	1.57975	11
Asxl1	-0.22004	0.381324	15	0.15895	0.614751	7
Asxl2	-0.089298	0.344295	15	-0.17156	0.496523	6
Asxl3	0.085226	0.836958	15	0.033957	0.160836	4
Asz1	0.054203	0.561584	15	0.27913	1.21527	7
Atad1	0.14378	1.2767	15	-1.2685	1.23264	6
Atad2	0.091698	1.8913	15	-0.29401	1.39751	11
Atad2b	0.17807	0.404206	15	-0.87858	1.4496	6
Atad5	-1.5006	13.9702	15	-0.89768	1.23653	10
Atat1	-0.082285	0.693018	15	2.0759	1.88379	7
Ate1	0.44763	5.45873	15	-0.20678	1.3439	18
Atf1	0.06896	1.27112	15	-0.15756	0.731445	14
Atf2	0.10673	0.54849	15	1.7771	2.44265	6
Atf3	0.11223	0.628175	15	-0.63845	2.75441	7
Atf4	-1.1749	11.8618	15	0.16904	0.813326	19
Atf5	-0.12987	0.754956	15	1.1203	1.93521	10
Atf6	0.21349	2.1721	15	0.21249	0.521737	10
Atf6b	-0.21481	1.21219	15	0.33128	0.748435	13
Atf7	0.22649	0.708964	15	0.22137	0.938774	4
Atf7ip	-0.029287	0.265512	15	-0.21082	0.595988	8
Atf7ip2	0.023972	0.583359	15	0.96372	0.999002	5
Atg10	0.14894	1.1176	15	-0.22185	0.85783	8
Atg101	-0.7285	4.26037	15	-0.40355	0.520641	4
Atg12	-0.17521	1.14745	15	0.08573	1.11601	18
Atg13	-0.43906	1.9696	15	-0.79286	1.23454	7
Atg14	-0.7187	4.91017	15	-0.42038	1.04927	12
Atg16l1	-0.13174	0.463694	15	1.8508	1.6758	7
Atg16l2	0.16247	1.72907	15	-0.31755	0.738285	22
Atg2a	-0.2854	1.72054	15	-0.32448	0.640544	4
Atg2b	0.035094	0.478143	15	-1.0576	1.12409	4
Atg3	-0.11582	1.14549	15	0.10722	0.554505	13
Atg4a	0.41415	4.09859	15	-0.31563	0.426154	5
Atg4a-ps	0.34257	2.45542	15	0.44362	0.508933	7
Atg4b	0.070125	0.196236	15	0.26797	0.159192	6
Atg4c	0.20892	1.2678	15	-0.56352	0.505734	6
Atg4d	-0.3895	2.39063	15	0.32486	0.8769	8
Atg5	-0.15733	0.897361	15	1.2468	1.43426	6
Atg7	0.18841	1.54435	15	-1.1266	0.884057	3
Atg9a	-1.1839	6.99131	15	1.8555	1.19797	3
Atg9b	0.02218	0.94796	15	-1.6843	1.52229	7
Athl1	0.28951	2.35741	15	-0.40835	0.871956	3
Atic	-0.29211	1.58565	15	-0.62303	1.58887	14
Atl1	0.17969	0.811606	15	0.89759	2.21743	9
Atl2	-0.78765	4.79458	15	0.30551	1.5169	7
Atl3	0.0091586	0.938774	15	1.7471	1.06289	3
Atm	-0.38192	2.05358	15	-0.71325	2.18628	16
Atmin	-0.23558	0.90243	15	-1.9441	1.5603	6
Atn1	-0.096694	1.12612	15	0.078089	1.22067	31
Atoh1	0.038315	0.296528	15	1.1681	0.916928	4
Atoh7	-0.34916	1.10897	15	0.89327	1.20206	8
Atoh8	0.10135	1.10796	15	-0.66199	0.682438	5
Atox1	-0.21307	1.27944	15	-0.10793	0.487676	14
Atp10a	-0.0011267	1.44282	15	0.62916	0.760625	4
Atp10b	0.061991	1.38292	15	0.26153	0.64407	8
Atp10d	0.25826	1.13804	15	-0.46527	2.00359	5
Atp11a	0.12037	0.997143	15	0.59068	0.700776	9
Atp11b	0.1708	1.23154	15	-0.26369	0.543528	4
Atp11c	0.25055	1.76273	15	-0.87382	1.00554	4
Atp12a	0.136	2.08791	15	0.061412	0.408068	19
Atp13a1	-0.38487	2.6986	15	-0.94006	1.66963	18
Atp13a2	0.24836	0.780835	15	0.21539	0.310664	8
Atp13a3	0.22091	1.75823	15	-0.42322	1.15618	7
Atp13a4	0.33492	1.98729	15	-0.50135	0.319066	5
Atp13a5	0.14077	3.17553	15	-1.1545	1.50044	7
Atp1a1	-2.9261	19.6244	15	-0.87488	2.08175	11
Atp1a2	-0.029308	1.39773	15	-0.0074279	0.523154	17
Atp1a3	0.05106	0.181306	15	-0.13383	0.486969	15
Atp1a4	0.17558	1.36519	15	-0.1343	0.54514	11
Atp1b1	0.31825	3.30699	15	0.62389	0.785315	15
Atp1b2	0.20404	2.46076	15	0.19163	0.665767	14
Atp1b3	-0.71569	5.04183	15	1.1978	1.82478	17
Atp1b4	0.14143	1.17702	15	-0.79603	1.02182	11
Atp2a1	0.080804	0.703313	15	0.3922	1.20709	11
Atp2a2	-4.3604	22.0508	15	-4.405	11.0245	12
Atp2a3	-0.22224	2.33375	15	-0.9249	1.42875	14
Atp2b1	-3.2197	20.7638	15	-1.8178	2.86445	14
Atp2b2	0.15459	1.30871	15	0.33118	0.531638	14
Atp2b3	0.16008	1.23989	15	-0.22283	0.482738	10
Atp2b4	-0.17298	1.13157	15	-0.095891	0.940323	16
Atp2c1	0.040534	0.911262	15	-0.14862	0.559122	4
Atp2c2	-0.084241	0.483782	15	-0.32556	1.04997	13
Atp4a	-0.089686	0.839952	15	-0.1195	0.190481	12
Atp4b	0.41649	1.82646	15	-0.62442	1.11202	7
Atp5a1	-1.2644	14.0417	15	-2.9664	4.52372	11
Atp5b	-1.65	10.6463	15	-0.94807	1.56016	14
Atp5c1	-1.4952	11.6413	15	-1.1028	2.69821	12
Atp5d	-1.4876	9.46197	15	-4.1943	6.46154	13
Atp5e	-1.651	8.97885	15	-0.86802	1.3441	9
Atp5f1	-0.87583	7.73748	15	-1.0302	1.94704	11
Atp5g1	-0.60509	2.63034	15	-0.22984	0.346961	8
Atp5g2	-0.10765	2.00827	15	-0.29339	0.366017	8
Atp5g3	0.088576	1.27239	15	0.14682	0.603173	10
Atp5h	-0.78475	3.90672	15	0.63689	0.361022	3
Atp5j	-0.71496	2.94939	15	-1.0945	2.40767	10
Atp5j2	-0.78829	5.22648	15	-1.1891	2.76591	16
Atp5k	-0.89936	5.55975	15	-2.1089	2.93874	13
Atp5o	-0.62389	10.6002	21	-1.9455	7.11118	28
Atp5s	0.33518	2.77778	15	0.30165	0.508092	16
Atp5sl	-0.44058	3.36009	15	-1.067	1.15883	9
Atp6ap1	-0.36066	2.93326	15	-3.0146	3.89208	13
Atp6ap1l	0.071752	1.57739	15	-1.3455	1.58384	6
Atp6ap2	-0.38628	4.8641	15	-0.92207	0.997532	8
Atp6v0a1	0.057456	0.20421	15	0.3201	1.23925	7
Atp6v0a2	0.023828	0.890725	15	0.6038	0.71833	7
Atp6v0a4	0.030408	1.29899	15	-0.059394	0.525128	8
Atp6v0b	-2.6574	11.8603	15	-0.27729	1.16273	4
Atp6v0c	-3.4282	14.5139	15	-4.1664	2.52421	4
Atp6v0c-ps2	-1.2841	3.43653	15	-2.1283	1.63641	4
Atp6v0d1	-2.4133	10.6761	15	-4.3035	4.15124	7
Atp6v0d2	-0.0097517	1.28388	15	-0.33943	0.428221	12
Atp6v0e	-1.5996	9.17044	15	-1.1638	1.55757	13
Atp6v0e2	0.2345	2.26392	15	0.10722	0.198912	7
Atp6v1a	-3.3027	17.1579	15	-4.0298	6.17386	13
Atp6v1b1	0.3077	2.00592	15	-0.57168	0.777284	4
Atp6v1b2	-3.1165	14.9297	15	-2.5654	2.26266	4
Atp6v1c1	-0.8413	5.90191	15	-1.2284	2.39148	5
Atp6v1c2	-0.15858	0.504733	15	-2.4686	1.96851	6
Atp6v1d	-2.8523	14.0032	15	-4.5203	3.54525	6
Atp6v1e1	-1.3663	7.43172	15	-1.4616	1.86385	7
Atp6v1e2	0.4176	2.79577	15	0.40961	0.359916	11
Atp6v1g1	-1.4708	5.21185	15	-3.4877	2.1479	5
Atp6v1g2	-0.24701	1.20579	15	-1.6603	2.3859	7
Atp6v1g3	0.23873	0.930332	15	0.67316	2.57201	10
Atp6v1h	-0.45938	3.32738	15	-1.3518	1.86729	7
Atp7b	0.010809	0.576918	15	-0.58658	0.88867	7
Atp8a1	0.088066	0.734027	15	0.39037	0.144881	3
Atp8a2	0.10821	0.994091	15	0.31025	0.833422	9
Atp8b1	0.26354	2.88512	15	0.40395	0.772705	6
Atp8b2	0.013068	0.694026	15	-0.13034	0.74386	11
Atp8b3	0.24372	1.32432	15	-0.18382	0.636069	12
Atp8b4	0.18272	0.786535	15	-0.094259	0.407945	6
Atp8b5	0.31177	1.56344	15	1.1	1.64191	3
Atp9a	0.1281	0.926942	15	-0.70482	1.07672	6
Atp9b	0.196	1.2677	15	0.40433	0.364798	7
Atpaf1	0.073667	0.899319	15	0.10755	0.82766	9
Atpaf2	-0.5741	3.04594	15	-2.723	2.32396	3
Atpif1	0.19214	0.685922	15	-0.60419	0.681582	7
Atr	-2.7679	18.4015	15	-3.0419	5.59984	19
Atraid	0.099735	1.14191	15	0.051412	0.619771	12
Atrip	-2.2375	6.94892	15	-1.077	2.56447	9
Atrn	0.34479	1.80998	15	0.092008	0.607655	10
Atrnl1	-0.080542	1.09638	15	-0.49891	0.837645	11
Atrx	-0.43173	3.98661	15	-0.79935	1.34609	7
Atxn1	0.10198	0.743547	15	0.77065	0.957031	7
Atxn10	-1.5207	7.82559	15	-2.0266	2.74453	7
[truncated: 18,462 more rows]

## Sheet: Fig3_Conventional_vivo
id	num	neg.lfc	minRRA.score
Marchf5	5	-7.2015	10.5963
Septin11	5	-7.4748	10.1782
Marchf7	5	-6.9651	9.15372
Septin12	5	-6.7162	7.90063
Marchf3	5	-6.8474	7.80033
Marchf4	5	-6.7523	7.47307
Eif2s2	5	-7.3564	7.30774
Septin8	5	-6.5819	7.23127
Marchf11	5	-6.6696	6.92691
Septin3	5	-6.5986	6.73072
Marchf10	5	-6.615	6.73072
Septin10	5	-6.4114	6.48786
Marchf8	5	-6.3848	6.44643
Marchf6	5	-6.6281	6.43418
Gtf2h2	5	-7.3485	6.3739
Marchf9	5	-6.6946	6.33871
Birc6	5	-6.8994	6.22184
Rpl8	5	-7.3086	6.20682
Septin4	5	-6.5886	5.61382
Vcp	5	-7.0975	5.3952
Rrm1	5	-7.0905	5.36275
Copb1	5	-6.6019	5.35673
Adam11	5	-4.3843	5.31179
Wdr46	5	-6.0873	5.2989
Rps11	5	-5.8295	5.14342
Eif2s3x	5	-7.0131	5.0688
Rps9	5	-5.8957	4.94237
Septin5	5	-5.9434	4.89856
Dpp6	5	-6.456	4.80286
Septin14	5	-5.6748	4.79531
Septin9	5	-5.9846	4.77796
Septin15	5	-5.7778	4.7697
Septin7	5	-6.4376	4.76183
Abcf1	5	-2.5239	4.75208
Septin1	5	-6.0441	4.72995
Pigk	5	-6.5952	4.70156
Gm14819	5	-5.9744	4.68992
Scarb1	5	-6.5853	4.68409
Snrpb2	5	-5.5365	4.65541
Polr1a	5	-1.5108	4.62982
Rpl23a	5	-3.7212	4.6298
Nufip1	5	-5.7661	4.62443
Cd47	5	-6.5063	4.61053
Septin6	5	-6.5377	4.58976
Psma7	5	-6.8886	4.58769
Dnajc17	5	-5.9382	4.53291
Olfr466	5	-6.3537	4.49264
Rsad1	5	-6.6052	4.43853
Atp5l	5	-6.8306	4.3831
Rpa1	5	-5.6237	4.3257
Prpf19	5	-1.7588	4.31344
Rps20	5	-5.4288	4.21508
Rnf152	5	-6.7847	4.20804
Hcn2	5	-2.0546	4.16501
Snrpd2	5	-1.9194	4.1527
Olfr308	5	-2.0165	4.1286
Slc39a10	5	-6.4486	4.12808
Ndufs3	5	-3.1515	4.08655
Rab3gap1	5	-5.4583	4.08101
Cstf1	5	-5.1321	4.07348
Rpl13	5	-5.6431	4.04475
Relt	5	-4.1075	4.02536
Vrk1	5	-3.7215	3.97392
Srsf3	5	-0.71976	3.93085
Taf1d	5	-6.1831	3.92544
Sat2	5	-6.5027	3.92544
Rpl35a	5	-6.1743	3.90651
Racgap1	5	-2.5155	3.90473
Mastl	5	-3.5267	3.89904
Zfp429	5	-5.2881	3.88068
Rpl31	5	-5.5706	3.87047
Rpl21	5	-4.6208	3.85032
Hectd1	5	-1.2764	3.84282
Ints2	5	-1.3969	3.84282
Cdc26	5	-1.0112	3.83327
Zbtb24	5	-5.9486	3.81242
Napa	5	-6.6665	3.80294
Rrm2	5	-4.8706	3.79
Oca2	5	-6.2309	3.78789
Olfr1302	5	-6.6601	3.78619
U2af1	5	-2.2049	3.78473
Gm9733	5	-6.657	3.77637
Med26	5	-5.8352	3.77114
Cct3	5	-4.2072	3.75659
Brf2	5	-6.0635	3.7442
Fpr3	5	-6.641	3.73
Psma2	5	-6.641	3.73
Gm14435	5	-6.1153	3.72148
Chac1	5	-6.6345	3.7093
Ddx49	5	-6.0246	3.70821
Dut	5	-3.0808	3.69424
Sgms1	5	1.5049	3.67559
Rilp	5	-6.6216	3.67555
Mdm2	5	-2.7518	3.67471
Gm21060	4	-5.7758	3.6718
Cenpw	5	-5.9224	3.65777
Gpr149	5	-6.615	3.65636
Snx18	5	-6.6117	3.64603
Gnb2l1	5	-3.551	3.6403
Gm22109	5	-5.712	3.6265
Snrpa1	5	-5.7483	3.62299
Alg2	5	-4.9786	3.60236
Ddx47	5	-2.7091	3.59431
Zw10	5	-5.9224	3.59137
Gm5177	5	-5.9065	3.59137
Gstz1	5	-6.5919	3.58976
Plekha2	5	2.5462	3.58846
Baz2b	5	-2.0276	3.56833
Lin54	5	-6.0097	3.5581
Rpl3	5	-5.4365	3.55689
Kif11	5	-6.5786	3.55393
Wdr75	5	-5.8352	3.55011
Olfr1094	5	-6.4413	3.5416
Mcm3ap	5	-4.5159	3.54085
Lmbrd2	5	-6.4189	3.52431
Crb1	5	1.4569	3.51591
Mblac2	5	-6.5651	3.51417
Scarf1	5	-6.5651	3.51417
Cdk4	5	-2.6941	3.50482
Alg11	5	-6.5583	3.49428
Gpr18	5	-6.5583	3.49428
Atp6v0b	5	-6.5583	3.49428
Prpf4	5	-1.4203	3.49336
Mpzl1	5	-6.5549	3.48224
Sprr2b	5	-3.6126	3.47666
Pigr	5	-6.5514	3.47232
Cct5	5	-5.933	3.46618
Caml	5	-6.548	3.4632
Fcgrt	5	-6.548	3.4632
Tns2	5	-6.548	3.4632
Mmab	5	-6.548	3.4632
Cep295nl	5	-5.6997	3.45675
Vhl	5	-4.6703	3.45649
Ndufb5	5	-3.8246	3.4553
Sntb1	5	0.23745	3.45378
Prpf38a	5	-5.7953	3.44958
Olfr1331	5	-5.8068	3.44958
Bcl7a	5	-3.1848	3.44433
Eaf1	5	-5.6237	3.44367
Dtymk	5	-6.5377	3.43945
Pdcd2	5	-3.7404	3.43035
Plb1	5	-6.5342	3.42987
Capn9	5	-6.5308	3.41965
Stxbp5l	5	-6.5308	3.41965
Sf3b4	5	-5.8849	3.41797
Six6	5	-5.874	3.40268
9930104L06Rik	5	-4.8988	3.40234
Ncl	5	-0.79171	3.39943
Fscn2	5	-4.3284	3.39742
Olfr70	5	-4.1289	3.39474
Slc29a3	5	-6.5203	3.39275
Olfr139	5	-6.5203	3.39275
Pwp2	5	-5.368	3.39177
Erbb3	5	-0.35746	3.38531
Cdk7	5	-3.5589	3.37659
Gspt1	5	-3.6406	3.37163
Rbx1	5	-3.9352	3.36355
Tctn2	5	-6.5063	3.36237
Rpl15	5	-3.6222	3.35666
Wdr70	5	-5.7602	3.35581
Tsen54	5	-5.4656	3.35474
Rpl5	5	-3.5021	3.35217
Tm9sf4	5	-1.8662	3.35113
Gtf3c1	5	-3.4183	3.3485
Clrn3	5	-6.4992	3.34506
Clvs2	5	-6.4992	3.34506
Dhx38	5	-4.7309	3.34351
Scrib	5	-2.671	3.33837
Mafb	5	-5.5085	3.33743
Vwa3a	5	-6.4921	3.32782
Atp10a	5	-6.4921	3.32782
Zfp689	5	-5.7423	3.32736
Ccdc74a	5	-5.9118	3.32736
Prkag2	5	-0.28782	3.32541
Vmn2r65	5	-5.7181	3.30923
Srsf2	5	-5.8125	3.30923
Cept1	5	-2.0674	3.30767
Nup62	5	-1.2374	3.30405
Mdn1	5	-5.7953	3.3004
Slc4a8	5	-6.4741	3.29261
Leprotl1	5	-6.4741	3.29261
Spsb2	5	-6.4705	3.28549
4933434E20Rik	5	-6.4189	3.28387
Fip1l1	5	-5.5907	3.28285
Psmd12	5	-6.2007	3.28257
Atp2a2	5	-3.7721	3.27989
Wdfy4	5	-6.4669	3.27842
Fcf1	5	-4.2898	3.27778
Rps21	5	-5.1503	3.27198
Vnn3	5	0.59106	3.26818
Mybl2	5	-5.8352	3.26637
Cd99l2	5	-6.456	3.25774
Pcyt1a	5	-6.456	3.25774
Tmem217	5	-3.1227	3.25153
Melk	5	-6.4523	3.25082
Zmat2	5	-5.7423	3.24875
Bcl10	5	-3.4772	3.24514
Haus4	5	-5.8519	3.23287
Ctxn1	5	-0.91161	3.23197
Magoh	5	-5.9486	3.22943
Top3a	5	-3.0362	3.22724
Dbn1	5	-6.4413	3.22532
Adam20	5	-6.4413	3.22532
Sult1b1	5	-6.4413	3.22532
Chek1	5	-3.8691	3.2251
Kirrel2	5	-6.4376	3.21798
Zfp773	5	-6.0825	3.21738
Rpl17	5	-3.0433	3.21226
Kbtbd8	5	-3.5769	3.21226
Nup107	5	-2.1247	3.21226
Ednrb	5	-1.691	3.20818
Chrna3	5	-6.4301	3.2024
Imp3	5	-5.5085	3.20193
Glrx3	5	-2.2591	3.19856
C6	5	-6.4264	3.19578
Rgs5	5	-6.4264	3.19578
Tars	5	-3.8535	3.19185
Lamtor5	5	-2.8549	3.18356
Izumo3	5	-6.4189	3.18337
Psmb5	5	-6.4189	3.18337
Tsg101	5	-3.0596	3.17715
Ifi30	5	-6.4152	3.17598
Disp1	5	-6.4152	3.17598
Astl	5	-6.4152	3.17598
Ldha	5	-0.37745	3.17079
Lin52	5	-5.8182	3.17052
Ikzf4	5	-5.6873	3.17052
Inafm1	5	-2.4369	3.16753
Fam46a	5	-5.8352	3.16369
Eif3g	5	-5.7303	3.16369
Galnt12	5	-6.4076	3.16205
Atp6v1b2	5	-6.4076	3.16205
Mpp2	5	-6.4076	3.16205
Tmem258	5	-6.4039	3.15649
Rpl18	5	-3.7631	3.1534
Diexf	5	-5.6302	3.15111
Tubgcp2	5	-6.0873	3.14891
Lamb1	5	-4.86	3.14817
Fbxo9	5	-6.3498	3.14817
Cstad	5	-5.5774	3.13791
Meis1	5	-5.6935	3.12623
Lingo4	5	0.86109	3.12479
Olfr1497	5	-6.3848	3.11827
Orc6	5	-5.6873	3.11496
Psmd14	5	-2.668	3.11418
Sox9	5	-5.7059	3.11411
Zfp518b	5	-5.7483	3.10975
Capza1	5	-6.3809	3.10975
Bccip	5	-2.9831	3.1069
Ces2f	5	-6.3771	3.10251
Serpinb1b	5	-6.3771	3.10251
Vmn1r219	5	-5.8295	3.09502
Rpl9-ps1	5	-2.5586	3.08677
Pvrl1	5	-0.13738	3.08588
Dna2	5	-5.4801	3.08506
Sf3b2	5	-5.5706	3.08506
Arhgap24	5	-6.3615	3.07904
Polr2f	5	-4.3617	3.0738
Tmem194b	5	-2.8872	3.07116
Heatr1	5	-6.0393	3.06812
Kif23	5	-3.5262	3.06324
Cast	5	0.062529	3.06324
Cyb5d1	5	-6.3498	3.06219
B3galt2	5	0.49074	3.06176
Olfr220	5	-3.483	3.06159
Ddx3x	5	-2.5765	3.05852
Zfc3h1	5	-5.5571	3.05516
Gm8787	3	-3.0135	3.05244
Fam193a	5	-5.451	3.05067
Taf5	5	-6.0147	3.05067
Pigq	5	-5.4138	3.05001
Akr1b8	5	-6.3419	3.04843
Cdh19	5	-4.6734	3.04335
Olfr514	5	-5.4598	3.04082
Slc25a16	5	-6.3379	3.04076
Ubn2	5	-5.5502	3.04058
Alox12e	5	-5.6558	3.04058
Chmp2a	5	-1.6825	3.0389
Fa2h	5	-3.0857	3.03493
Rps17	5	-5.4944	3.0328
Tie1	5	-3.1355	3.02678
Olfr39	5	-6.33	3.02595
Ept1	5	-6.33	3.02595
Pax9	5	-3.1948	3.02518
Sync	5	-5.6997	3.02518
Dnajb6	5	-5.4436	3.02283
Luc7l3	5	-5.3602	3.0198
Vmn1r42	5	-6.326	3.01766
Sft2d1	5	-6.326	3.01766
Spcs3	5	-1.1865	3.01719
Sf3a2	5	-5.7483	3.01132
Spin2c	5	-5.5774	3.0112
Stxbp3a	5	-6.322	3.0093
Gpatch8	5	-5.6558	3.00892
Anln	5	-5.8575	3.00716
Sbds	5	-5.7543	3.0065
Orc5	5	-5.5502	3.0065
Rpl26	5	-2.5123	3.00507
Psmc3	5	-5.7303	3.00448
Ces1f	5	-6.318	3.00099
Ubap1	5	-6.318	3.00099
Rtf1	5	-5.7543	2.99525
Nup205	5	-3.2364	2.99114
Donson	5	-5.7363	2.99
Slc17a3	5	-6.3099	2.98712
Xkr7	5	-5.0476	2.98653
Prelp	5	-0.76068	2.98653
Tmprss6	5	-1.9431	2.98209
Orc2	5	-5.4288	2.98043
Kin	5	-5.2464	2.97914
Rps12	5	-5.7778	2.9756
Vgll2	5	-5.772	2.9756
Cd9	5	-6.3018	2.97539
Uba1	5	-3.3003	2.97469
Tsen15	5	-5.3523	2.97428
Nelfe	5	-5.6558	2.96714
Psmc6	5	-5.3602	2.96714
Eef1g	5	-5.5841	2.96198
Nipal3	5	3.5244	2.9579
Olfr629	5	-6.2936	2.95746
4931417E11Rik	5	-5.6431	2.95664
Rfc3	5	-5.9846	2.95558
Hemt1	5	-4.5983	2.9544
Rbp1	5	-3.1419	2.95429
Smc6	5	-5.5085	2.95273
Ptar1	5	-6.2895	2.95059
Ktn1	5	-5.3286	2.94939
Mphosph6	5	-5.2464	2.94808
Rbm8a	5	-5.1682	2.9423
Tmem120b	5	-0.87684	2.93983
Dcx	5	-3.2278	2.93764
Sulf2	5	2.1789	2.93715
Adcy10	5	-1.6126	2.93715
Snrpd3	5	-5.2208	2.93476
Ces3a	5	-6.2772	2.93207
Fkbp2	5	-2.8326	2.92978
Gm26391	4	-5.2741	2.92926
Mphosph10	5	-5.3125	2.92812
Hephl1	5	-1.6207	2.91403
Diras1	5	-1.4642	2.91403
Srp68	5	-5.4872	2.91091
Smpd2	5	0.7593	2.90302
Spred1	5	-4.8998	2.90302
Atp6v1f	5	-3.5308	2.90302
Scin	5	-5.7895	2.89333
Papss1	5	-2.8776	2.88662
Tbc1d7	5	-3.1419	2.88616
Cdc42ep1	5	-2.0134	2.88183
Cacng2	5	0.8841	2.88183
Hsd17b2	5	-6.2437	2.88104
Slc25a28	5	-6.2437	2.88104
Hspe1	5	-3.9983	2.88074
Serpini1	5	-2.2367	2.87844
Olfr311	5	-3.726	2.87618
Lysmd3	5	-6.2394	2.874
Chrnb3	5	-5.0848	2.86829
Atp6v1d	5	-3.2138	2.85921
Ucma	5	-6.2266	2.85124
Nars	5	-6.1107	2.8475
Stt3b	5	1.5785	2.84472
Kcng1	5	2.779	2.84354
Gm2030	5	-5.5295	2.84239
Acsm5	5	-3.6851	2.84167
Triap1	5	-4.9602	2.84016
Ccdc59	5	-5.4944	2.83791
Sec16a	5	-4.9464	2.83416
Fgg	5	-2.4469	2.83298
Dsg3	5	-6.205	2.81933
Tnpo3	5	-5.2208	2.8183
Gm23284	5	-3.7314	2.81744
Kcnj2	5	-2.5565	2.81321
Lin7a	5	-2.1431	2.81321
Cst10	5	-3.1997	2.81239
Zfp991	5	-5.4214	2.81177
Bub3	5	-5.4944	2.79781
2610528J11Rik	5	-1.244	2.79757
Kpnb1	5	-3.87	2.7955
Imp4	5	-5.095	2.79374
Hyal5	5	-6.1875	2.7918
Clec2d	5	-4.9128	2.78537
Gm94	5	-3.464	2.78299
Tspan18	5	-3.257	2.78002
Rab19	5	-1.6466	2.77885
Gm6268	5	-5.0883	2.77757
Psmd4	5	-3.3321	2.77433
Olfr1412	5	-1.6992	2.76919
Fdx1l	5	-6.1743	2.7682
Eif2b5	5	-5.7837	2.76812
Polr1e	5	-1.2838	2.76678
Cnrip1	5	-4.9572	2.76163
Ap1m1	5	-1.8907	2.76133
Fam193b	5	-5.3206	2.756
Gm8994	5	-3.2068	2.75459
Cyp2c67	5	-4.5798	2.75163
Armcx3	5	-0.69089	2.74931
Fam171b	5	3.1449	2.74931
Myc	5	-3.2404	2.74732
Ascc3	5	-2.1818	2.74492
Psmd7	5	-6.1564	2.74283
Max	5	-2.7761	2.74084
Crocc2	5	-5.2881	2.7394
Rnf145	5	-6.1519	2.73561
Csn3	5	-2.8284	2.73488
Epb4.1l3	5	0.14538	2.7325
Cox8b	5	-4.5964	2.73114
Lrrn2	5	-1.2219	2.73114
Gpr150	5	-3.1098	2.72434
Kcnj10	5	-5.0062	2.72398
Olfr716	5	-0.98264	2.72303
Cldnd2	5	-6.1428	2.72154
Mrpl47	5	-4.6343	2.71844
Cspg4	5	-4.6734	2.71788
Lrfn2	5	0.37945	2.71634
Cldn7	5	-1.7471	2.71634
Vwde	5	-6.1383	2.71435
Gm36176	5	-5.3757	2.71043
AU040320	5	-4.3976	2.70956
St8sia2	5	-0.10493	2.70706
D430042O09Rik	5	-5.3523	2.70463
Sppl2c	5	-2.1884	2.70115
Amdhd1	5	-3.0902	2.70115
Pltp	5	-1.8591	2.70115
Gramd2	5	-1.7909	2.70073
Zfp207	5	-5.6171	2.69943
Itgb2l	5	-5.4288	2.69823
2410141K09Rik	5	-4.5632	2.69549
Rpf1	5	-4.5131	2.69549
Clu	5	-0.14281	2.69499
Dctn3	5	-0.38447	2.69499
Gpr63	5	-6.1519	2.69349
Chrm4	5	-6.1245	2.6925
Kdelr3	5	-6.0097	2.69065
Bak1	5	0.69084	2.68973
Vmp1	5	-5.3772	2.68742
Abcg3	5	-2.9985	2.68548
Hspd1	5	0.72426	2.68447
Tspan7	5	-2.4221	2.68079
Shq1	5	-5.2208	2.68071
Slc15a4	5	-4.0933	2.67574
Ndufs5	5	-2.7321	2.67436
Tomm40l	5	-3.1861	2.67436
Urm1	5	-1.7182	2.67436
Olfr906	5	-2.5452	2.67412
Gprc5c	5	-0.84229	2.67113
Tcn2	5	-4.4196	2.66981
Vmn2r81	5	-4.0237	2.66878
Crcp	5	-3.971	2.66585
Adgrb3	5	-6.106	2.66336
Gm49345	5	-3.4581	2.66224
Kdelc1	5	-3.9817	2.6617
Sv2a	5	-3.4266	2.66093
Olfr571	5	-2.8918	2.65704
Zfp706	5	-5.6366	2.65404
Chrm3	5	-1.3908	2.65024
Slc35b1	5	-5.8295	2.65024
Psmd2	5	-4.2532	2.65024
Pik3r4	5	-1.115	2.64793
Lrrc4c	5	-1.3778	2.64793
Zfp955b	5	-5.4436	2.64612
Dr1	5	-2.9825	2.64503
Rfx2	5	-2.2663	2.64279
Ccdc188	5	-6.092	2.63903
Olfr61	5	-6.092	2.63903
Vamp5	5	-2.8502	2.63835
3110021N24Rik	5	-4.5351	2.63609
Akap13	5	-3.1257	2.63472
Rit2	5	3.5124	2.63457
Cdk5r2	5	-3.0967	2.63406
Papd4	5	-6.0873	2.62925
St6galnac2	8	-4.6295	2.6288
Mcm5	5	-5.0375	2.62818
Rab36	5	1.4134	2.62589
Pgls	5	-0.78025	2.62527
Rab31	5	-4.7717	2.62339
Gca	5	-4.2704	2.62217
P2ry4	5	-1.8959	2.62164
Capg	5	-6.0825	2.61982
Cox5b	5	-4.8385	2.61928
Fat3	5	-2.56	2.61739
Adck5	5	-2.0098	2.60905
Rhbdd1	5	-0.10299	2.60801
Sla2	5	-1.0105	2.60801
Polr3e	5	-4.5961	2.60485
Tectb	5	0.7942	2.60086
P3h1	5	-6.0683	2.59544
Vsig10	5	-2.4428	2.5931
Slc17a8	5	-0.35448	2.59283
Nxf1	5	-2.3315	2.59068
Paqr3	5	-4.5757	2.58814
Utp23	5	-5.712	2.58715
Dennd1a	5	3.9042	2.58494
Atpaf2	5	-2.8411	2.58471
Snrpd1	5	-5.1321	2.58323
Kif3b	5	-5.8125	2.58087
Rpl27a	5	-3.1965	2.57756
Tmem63b	5	-4.3379	2.57476
Gm3752	5	-5.6171	2.5736
Akap10	5	-4.6976	2.57266
Matr3	5	-2.1194	2.56876
Lrp1b	5	-2.0747	2.5673
Sfi1	5	-5.5907	2.56392
Zfp36l2	5	-4.7505	2.5639
Tsr1	5	-5.6558	2.56185
Ufd1l	5	-3.1552	2.56127
Lypd8	5	-2.5576	2.55969
Cd4	5	-0.69815	2.55969
Kcng3	5	-1.4406	2.55969
Csgalnact2	5	-1.1962	2.55969
Il22ra2	5	-1.3953	2.55841
Shisa9	5	-1.0335	2.55841
Tmem161b	5	-6.0441	2.55736
Gm22291	5	-5.4801	2.55567
2300009A05Rik	5	0.17799	2.55354
Masp1	5	-3.0011	2.55259
Ugt3a1	5	-6.0393	2.54918
Tmigd1	5	-3.0157	2.54814
Gpr65	5	-4.8955	2.54754
Slc38a4	5	0.58949	2.54752
Smg5	5	-4.3066	2.54552
Gm7609	5	-5.5706	2.5416
Lzts3	5	-1.8746	2.54041
Hdgfl1	5	-4.0121	2.53984
Rad17	5	-4.1618	2.53828
Mrpl53	5	-5.1948	2.53744
Gm904	5	-4.5852	2.53709
Wdr5	5	-3.027	2.53606
Ceacam20	5	-0.62557	2.53341
H2-D1	5	-3.8924	2.52872
Rnf148	5	-2.2647	2.52812
Exoc4	5	-2.3337	2.52777
Gtpbp4	5	-2.8021	2.52688
Slc44a2	5	0.30594	2.52653
Gle1	5	-5.6873	2.52523
Gar1	5	-2.3729	2.52487
Gars	5	-3.3015	2.52336
Arl2	5	-3.5575	2.52001
Ms4a2	5	-1.2621	2.51985
6330403A02Rik	5	-2.0031	2.51975
Ap1s3	5	-2.9255	2.51829
Tfb2m	5	-2.6808	2.51576
Colq	5	-4.9536	2.51339
Myh7b	5	-1.9017	2.51307
Psmd6	5	-4.0472	2.51084
Scgb2a2	5	-5.5639	2.51063
Mfsd5	5	-0.30054	2.51063
Ppm1l	5	-2.7078	2.51063
Rtl1	5	-3.6448	2.50879
Ophn1	5	-3.4295	2.50847
Rbbp6	5	-3.3751	2.50812
Rnf223	5	-5.4479	2.50711
Srsf11	5	-2.7231	2.5067
Cystm1	5	-0.54767	2.5065
Rnu3a	10	-1.5899	2.50491
Atp6v1c1	5	-0.844	2.50217
Fam19a4	5	-2.7999	2.50217
Cxcl11	5	-1.707	2.50217
Gm21293	5	-2.2668	2.5015
Rbbp8nl	5	-5.4801	2.49993
Rbm27	5	-6.0097	2.49665
Rpl9	5	-4.3963	2.49573
Slc22a17	5	-1.6955	2.49424
Tmem30b	5	2.7749	2.49364
Ctcf	5	-5.5015	2.49233
Jmjd4	5	-2.2782	2.49208
Esyt3	5	-3.8099	2.48979
Gtf3c6	5	-3.1529	2.4896
Tmem211	5	-4.0071	2.48837
Emg1	5	-6.0047	2.48762
H2al1i	5	-6.0047	2.48762
Copb2	5	-4.0894	2.48736
Scap	5	0.075391	2.4866
Asphd2	5	-2.802	2.4866
Ccnk	5	-2.2549	2.48011
Olfr574	5	-5.115	2.48011
Gprc5a	5	-5.9997	2.47899
Actr1b	5	-5.9997	2.47899
Haus7	5	-5.9997	2.47899
Cldnd1	5	-5.0476	2.4781
Spa17	5	3.7709	2.4781
Sord	5	-2.4668	2.47625
Diap3	5	-5.6811	2.47374
Ralgps2	5	-3.0703	2.47344
Vps26b	5	-4.885	2.47344
Mmp8	5	-4.8779	2.47344
Grpel2	5	-5.9947	2.47108
Magef1	5	-2.788	2.46976
Trib1	5	-3.1153	2.46529
Ddx39b	5	-4.6284	2.46326
Stard9	5	-5.9896	2.46321
Rpl9-ps6	5	-5.9896	2.46321
Zmynd8	5	-0.87386	2.45722
Lsm3	5	-5.8849	2.45488
Hist2h2aa1	5	-5.9846	2.45421
Zfp68	5	-5.9846	2.45421
Csnk1a1	5	-2.3325	2.45264
Spdya	5	-2.0429	2.45144
Rplp2	5	-5.9725	2.45127
Grin3b	5	1.8102	2.45127
Gfpt1	5	-4.5723	2.45127
Phlda3	5	-5.9011	2.45127
Fam159a	5	-0.75479	2.45127
Tpx2	5	-4.5162	2.45076
Rasip1	5	-4.0203	2.44883
Scube2	5	2.9042	2.44574
Gm17655	5	-5.5295	2.44443
Spi1	5	-3.9226	2.44228
Gins3	5	-3.9707	2.44183
Cpsf3l	5	-4.3454	2.44067
Wdfy2	5	-4.0175	2.43942
Olfr1457	5	-2.8963	2.43785
Pced1a	5	-4.2953	2.43478
Sacm1l	5	-3.2321	2.43455
Qdpr	5	-2.7844	2.42988
Thy1	5	0.08157	2.42988
Tmem234	5	-4.2047	2.42906
Cyp21a1	5	-0.85607	2.42522
Topbp1	5	-2.8803	2.42502
Rpl37a	5	-2.6931	2.42364
Kif1c	5	-4.7699	2.4235
Abcc2	5	-5.1682	2.42255
Crnkl1	5	-3.7031	2.42154
Oxa1l	5	-2.208	2.42119
Ralgapa1	5	-4.2518	2.42047
Smek1	5	-2.1394	2.41862
Sf1	5	-5.6237	2.41715
Veph1	5	-3.7143	2.41479
Olfr481	5	-4.0474	2.41277
Snrpb	5	-5.959	2.41136
Dnajc7	5	-5.959	2.41136
Klk13	5	-2.9809	2.41084
Olfr1383	5	-3.6076	2.40705
Bnip1	5	-5.5841	2.40578
Wbp1l	5	-3.6605	2.40519
Pafah1b1	5	-4.3285	2.40519
Gm6644	5	-5.712	2.40479
Rpl36al	5	-2.7583	2.40431
Pcdh9	5	-2.4585	2.40381
Gm9493	5	-5.9538	2.40341
Ctsj	5	-5.9538	2.40341
Vat1l	5	-5.2683	2.40339
Prim2	5	-2.1089	2.40329
Btf3l4	5	-2.5919	2.40316
F11	5	-3.9072	2.40012
Fam3a	5	1.3009	2.39898
Egfl7	5	3.2238	2.39898
Naa25	5	-5.7778	2.39821
1700015F17Rik	5	-5.0856	2.39793
Ano4	5	-1.3357	2.39751
Ints9	5	-5.9486	2.3959
Vmn1r68	5	-2.4362	2.39348
Etf1	5	-5.3757	2.39247
Plbd1	5	-1.333	2.39197
Col28a1	5	-2.2993	2.39197
Epdr1	5	-3.5455	2.39197
Zfp345	5	-3.2455	2.39146
Wdr3	5	-4.4339	2.39119
Hnrnpc	5	-5.9434	2.38776
Cnnm2	5	2.7273	2.38748
Sympk	5	-1.9778	2.38748
Focad	5	-0.57651	2.38748
Slc15a2	5	1.0123	2.38501
Chrna6	5	-0.49591	2.38501
Pepd	5	-4.0867	2.38501
Plxnd1	5	-3.895	2.38501
Mrps7	5	-1.7601	2.38418
Gm9125	5	-4.1226	2.38253
Psmb4	5	-4.4651	2.38065
Vps25	5	-2.0803	2.37994
4930430A15Rik	5	-5.9382	2.37922
Camsap2	5	-4.607	2.37795
Ppil1	5	-1.8556	2.37781
Nol9	5	-3.7335	2.37732
BC061237	5	-5.5226	2.37707
Mpzl3	5	-3.7005	2.37677
Atp6v1e1	5	-2.1404	2.37677
Tomm7	5	-3.1195	2.37677
Zfp451	5	0.17066	2.37527
Use1	5	-3.8311	2.37328
Gm829	5	-5.8575	2.36948
Olfr373	5	-5.4069	2.36931
Ska2	5	-4.2557	2.36817
Polr2b	5	-4.2992	2.36805
Fcrlb	5	-2.5366	2.36805
Ddah1	5	-4.3933	2.36615
Sf3b1	5	-3.6938	2.364
Thoc2	5	-5.2294	2.364
Gm5105	5	-5.9277	2.36395
Rps27	5	-3.5624	2.36339
Rrp9	5	-3.9091	2.36312
Tmem71	5	-1.8003	2.36282
Sdr16c6	5	-1.85	2.36116
Atcay	5	-2.7018	2.361
Tbcd	5	-2.8967	2.36017
1700013F07Rik	5	-3.2226	2.35965
Olfr957	5	-1.8593	2.35895
Eif4a2	5	-4.7462	2.35654
Gtse1	5	-5.9224	2.3558
Lef1	5	-5.9224	2.3558
Mien1	5	-2.7346	2.35412
Cks1b	5	-3.7123	2.35386
Olfr1277	5	-5.6431	2.35142
Atad3a	5	-3.1223	2.35016
Rad51c	5	-3.1043	2.3497
Cpa5	5	-5.3897	2.34943
Cypt12	5	-5.9171	2.34734
Gm11549	5	-5.9171	2.34734
Gm14151	5	-5.3523	2.3467
Phc3	5	-4.3923	2.3467
Enpp6	5	-2.8799	2.34591
Olfr812	5	-1.1102	2.34591
Slc16a4	5	-0.41756	2.34591
Uqcr10	5	-4.8708	2.3452
Eif4a3	5	-5.5365	2.34242
Ank3	5	3.7034	2.34057
Cth	5	-0.5787	2.34057
Lime1	5	1.6168	2.34057
Zfp830	5	-5.6811	2.33981
Adamts15	5	-5.9118	2.33878
Wdr53	5	-3.9983	2.3377
Zscan21	5	-1.9839	2.33625
Napsa	5	-2.4009	2.33518
Foxred2	5	-3.7813	2.33374
Pja1	5	5.1099	3.08602
Gart	5	0.88773	2.33172
Pcsk2	5	-1.1512	2.33172
Denr	5	-5.9065	2.33117
Rpl37	5	-1.5789	2.32743
Mmd2	5	-3.1419	2.32596
Trappc5	5	-2.0417	2.32596
Olfr578	5	-1.9542	2.32596
Olfr218	5	-1.856	2.32544
Znhit6	5	-3.889	2.32397
Vstm2l	5	-5.9011	2.32366
Slc6a16	4	-4.5405	2.32336
Slc26a6	5	2.1178	2.32314
Ilvbl	5	-2.9559	2.31953
Spaca7	5	-3.7605	2.31915
Ptcd2	5	-2.2105	2.31838
Vmn1r43	5	-2.9323	2.31746
Steap4	5	-0.57193	2.31678
C1qtnf2	5	-1.0237	2.31678
Stoml1	5	-2.2376	2.31412
Vmn1r66	5	-3.9681	2.31403
Tas2r139	5	-0.090844	2.31403
Adprm	5	-2.7589	2.31403
Rpl39l	5	-3.8272	2.31314
Prelid2	5	-3.8478	2.31278
Gm11554	5	-2.3048	2.31213
Ndufc1	5	-5.109	2.31138
Kcne3	5	1.852	2.31051
Ube2d2a	5	-2.5738	2.31048
Sgsh	5	-4.1175	2.3099
Dpysl3	5	-3.813	2.30948
Mad2l1bp	5	-2.7299	2.30886
Gpr82	5	0.59212	2.30682
Amz2	5	-3.2981	2.30682
Odc1	5	-0.91292	2.30682
Abca12	5	-3.769	2.30682
Mtfr2	5	-2.6632	2.30609
Mypn	5	-5.4944	2.30575
Olfr1487	5	-4.3313	2.30575
Smim19	5	-2.3904	2.3023
Dtl	5	-3.1089	2.3023
Rab15	5	-3.942	2.30229
Ano10	5	0.085778	2.29915
Epb4.1l1	5	-1.4224	2.29724
Hist1h4f	5	-3.8302	2.29502
Sema4c	5	-3.3811	2.2946
Lrrtm3	5	-0.56653	2.29423
Fermt2	5	-4.5444	2.29402
Eif2b1	5	-5.8795	2.29223
Psmc4	5	-5.8795	2.29223
Kcng4	5	-2.7149	2.29155
Nip7	5	-5.4363	2.29129
Tmem191c	5	-3.5672	2.29129
Ctnnbl1	5	-5.8464	2.29105
Themis2	5	-4.2953	2.29058
Jam3	5	-2.6208	2.29026
H2afb3	5	-4.0915	2.28799
Olfr109	5	-4.2416	2.28586
Narfl	5	-5.6558	2.2857
Rnps1	5	-2.2803	2.28472
Mrpl4	5	-4.2886	2.28451
Nudc	5	-2.1985	2.28436
Psenen	5	0.36074	2.28436
Rhbdd3	5	-2.894	2.28379
Rnf139	5	-3.3649	2.28141
Kptn	5	-4.8126	2.28112
Ruvbl1	5	-5.6431	2.27966
Mybph	5	-4.3066	2.27925
Bmp8a	5	0.97176	2.27854
Gm3696	4	-5.7795	2.27854
Dclre1b	5	-1.8538	2.27732
Rbp4	5	-4.3904	2.27613
Gm1604b	5	-5.8685	2.27555
Sema3d	5	-1.073	2.27554
Car10	5	-3.1952	2.27531
Cep192	5	-3.0539	2.27523
Tut1	5	-3.3373	2.27509
Rps14	5	-1.809	2.27433
Gm25212	5	-3.6697	2.27166
Slc4a7	5	0.68718	2.27091
Usp46	5	1.3744	2.27091
Rhag	5	-1.7826	2.27091
Rps15	5	-5.7543	2.27042
Mansc4	5	3.9856	2.27016
Grm3	5	-1.7604	2.27016
Pcdhgb4	5	-4.0224	2.27016
Dync1i2	5	-2.9841	2.26891
Aars	5	-2.0441	2.26781
Rbm38	5	-5.863	2.2675
Ttc1	5	-5.863	2.2675
Wfdc6b	5	-4.6177	2.26547
Lrr1	5	-3.9522	2.26448
Riok2	5	-1.4254	2.26382
Slc48a1	5	-2.6032	2.26382
Atp11b	5	-1.82	2.26382
Slc22a20	5	-2.6737	2.26382
Unc93b1	5	-1.4685	2.26382
Aloxe3	5	-3.7979	2.26346
Ubox5	5	-0.81718	2.2634
Gm5591	5	-5.1771	2.26095
Fancg	5	-5.8575	2.25991
Brk1	5	-5.8575	2.25991
Gm3636	5	-5.8575	2.25991
Gm2000	5	-3.3512	2.25976
Cnot3	5	-2.6151	2.25903
Mta2	5	-2.5857	2.25853
Atp13a3	5	-0.040617	2.25786
Vps33b	5	-5.0507	2.25786
Abat	5	-2.1009	2.25703
Nkain2	5	-3.1726	2.25703
Ddx27	5	-3.8644	2.25538
Defb1	5	-3.8269	2.25464
Snrnp35	5	-2.1916	2.25439
Zbtb8os	5	-2.5526	2.25425
Mrto4	5	-5.7837	2.25346
Gpr176	5	3.7823	2.25239
Uxt	5	-5.8519	2.25237
Map1b	5	-3.334	2.25223
Tuft1	5	-1.7525	2.25029
Tmem185b	5	-4.6405	2.25029
Acot3	5	-2.6109	2.25029
Bco1	5	-2.6998	2.25029
Tra2b	5	-5.4288	2.24774
Apoo	5	-2.9279	2.24633
Nedd1	5	-3.5105	2.24578
Dtna	5	-2.1274	2.24519
Rft1	5	-5.8464	2.24509
Myo1b	5	-5.8464	2.24509
Fbxl2	5	-5.8464	2.24509
Mcm3	5	-3.3842	2.2434
Mrpl49	5	-1.3774	2.24313
Herpud1	5	0.58344	2.24313
Acsm4	5	0.65369	2.24313
Cd2ap	5	-3.6115	2.24185
Pign	5	-3.8835	2.24164
Mrps11	5	-5.7363	2.241
Cox17	5	-4.3301	2.24045
Olfr385	5	-4.3986	2.23971
Gpr137b	5	0.13235	2.23812
Susd2	5	-2.959	2.23794
Rpl7a	5	-1.4381	2.23728
Metap2	5	-3.832	2.23728
Mchr1	5	0.15169	2.23715
Lgi1	5	-2.4009	2.23715
Esp31	5	-4.0324	2.23707
Rngtt	5	-1.4371	2.23483
A4gnt	5	-1.9471	2.23444
Angptl7	5	-2.8588	2.23412
Npy6r	5	-2.2636	2.23273
Scarb2	5	-2.4958	2.23218
Kcnq5	5	-0.52247	2.23218
Cntn2	5	-2.5495	2.23218
Psma6	5	-5.3134	2.23042
Scaf1	5	-5.8352	2.23024
Jakmip3	5	-5.8352	2.23024
Socs4	5	0.26892	2.22944
1600012H06Rik	5	-1.3338	2.22944
Cdca8	5	-1.4611	2.22937
Slc25a36	5	-2.1391	2.22871
Pramef12	5	-1.4574	2.22627
Cox10	5	-4.5897	2.22627
Sumf1	5	-2.4562	2.22627
Pex5	5	-3.4307	2.22627
Tti2	5	-4.4773	2.2262
Hus1	5	-1.4996	2.2255
Nudcd3	5	-3.5934	2.22519
Cmss1	5	-5.8295	2.22229
Zfp386	5	-5.3444	2.22227
Arfgef3	5	0.19524	2.22092
Mest	5	-3.6076	2.22027
Slc26a5	5	-2.8015	2.21978
Asb13	5	-3.2681	2.21978
Olfr307	5	-2.219	2.21921
Ahnak	5	-3.197	2.21919
Gpd2	5	-3.5672	2.21675
Plekha8	5	-3.2824	2.21635
Herpud2	5	-0.72155	2.21423
Coro7	5	-1.998	2.21389
Tmem150c	5	1.6112	2.21303
Prim1	5	-5.3206	2.21303
Gemin5	5	-5.8239	2.21283
Ankrd24	5	-5.8239	2.21283
Sult1d1	5	-5.8239	2.21283
Zfp326	5	-2.272	2.21221
Rps25	5	-1.9314	2.21221
Nfs1	5	-2.3625	2.20967
Hspa8	5	-3.3269	2.20613
Tex10	5	0.19134	2.20601
Wnt3	5	0.46873	2.20601
Eif3m	5	-3.012	2.20384
Mroh6	5	-5.8182	2.2035
C1ql3	5	-0.75741	2.20201
Rmdn2	5	-1.1777	2.20201
Tnk1	5	-3.067	2.20201
Nrn1	5	-0.13302	2.20116
Slc35e1	5	-3.6143	2.20016
Rraga	5	-2.8276	2.19887
Tbc1d25	5	-1.8835	2.19851
Eef2	5	-1.4839	2.19764
Pes1	5	-4.1668	2.19633
Ly6g6f	5	-3.4948	2.19566
Prp2	5	-3.1163	2.19555
Kctd4	5	-5.0507	2.19555
Gp2	5	-2.0578	2.19555
Ctr9	5	-1.9887	2.19487
Rqcd1	5	-5.8125	2.19483
Wdr47	5	-5.8125	2.19483
Arhgef3	5	-5.8125	2.19483
Haus2	5	-5.8125	2.19483
Olfr1040	5	-5.8011	2.19405
Rps18	5	-3.5161	2.19405
Tgfb1i1	5	-5.6366	2.19339
Bco2	5	-4.0472	2.19318
Lrrc8c	5	-0.20172	2.19318
Chtf8	5	-2.1281	2.1924
Rps3	5	-5.5015	2.19142
Ndrg3	5	-4.125	2.18898
Kcns2	5	-0.58113	2.18884
Llph	5	-5.8068	2.18641
Sdccag3	5	-5.8068	2.18641
Esf1	5	-5.8068	2.18641
Cntnap5a	5	-5.8068	2.18641
Pdrg1	5	-2.7997	2.18629
Ap2m1	5	-1.8449	2.18613
Clec4g	5	-1.9145	2.18448
Ddost	5	-3.5455	2.18104
Rps2	5	-3.2277	2.1803
Odf4	5	-4.9834	2.18005
Erp27	5	-5.8011	2.17844
Ndufaf3	5	-5.8011	2.17844
Dpp10	5	-2.5307	2.17828
Atp7a	5	-2.8433	2.17828
Adck4	5	-1.0426	2.17828
Reep3	5	-3.3811	2.17828
Ccl19.2	5	-1.3258	2.17765
Slc35d3	5	-4.0831	2.17742
Plat	5	-3.207	2.17606
Puf60	5	-2.7723	2.17542
Chaf1a	5	-3.8012	2.17404
Rab29	5	1.9424	2.1731
Lingo1	5	-1.0987	2.17216
Amy2a5	5	-2.7212	2.17216
Neu4	5	0.62238	2.17216
Ankle2	5	-5.7953	2.17121
Phax	5	-5.7953	2.17121
Gpr139	5	2.1148	2.17009
Mtmr6	5	-0.064245	2.1671
Plekha3	5	-0.40963	2.16505
Rnf166	5	1.3014	2.16505
Lypd3	5	-1.1408	2.16505
Olfr641	5	1.5729	2.16505
Kcnk5	5	-2.3073	2.16505
Thoc1	5	-5.3987	2.16428
Slfn1	5	-5.3044	2.16254
Gm17026	5	-1.4646	2.16253
Ufc1	5	-4.2958	2.16123
Zfyve9	5	1.1806	2.15972
Tmem19	5	-0.98948	2.15972
Ifi27	5	-5.6366	2.15966
Gm7978	5	-2.2473	2.15835
Slamf6	5	-3.3511	2.15831
Olfr1164	5	-1.6977	2.15818
Sbpl	5	-4.8885	2.15814
Gosr2	5	-2.7706	2.15814
Zdhhc16	5	-0.10913	2.15814
C8b	5	-2.7212	2.15675
Slx	5	-5.7837	2.15646
Os9	5	-5.7837	2.15646
Btbd35f10	5	-5.7837	2.15646
Cdc42ep4	5	-0.068408	2.15536
Prss46	5	-4.2989	2.15342
Qars	5	-3.3776	2.15216
Rabggtb	5	-1.8931	2.15144
Lrrc20	5	-2.6153	2.15131
Ndufa12	5	4.0669	2.15104
Aire	5	-4.7129	2.15104
Ablim3	5	-3.5266	2.15068
Apbb3	5	-5.7778	2.14911
Gm10654	5	-5.7778	2.14911
E330009J07Rik	5	-2.3872	2.14805
Cdc40	5	-5.4436	2.14792
Arpc2	5	-3.2009	2.14716
Erp44	5	-3.8459	2.14675
Frmd8	5	-3.1196	2.14638
Dynlrb1	5	-3.2351	2.14496
Tmc5	5	-1.8107	2.14422
Slc30a6	5	-2.6273	2.14422
Slc25a23	5	-0.42431	2.14422
Polr1d	5	-1.7679	2.14394
Gzmc	5	-4.6343	2.14315
Ccdc162	5	-5.772	2.142
Zic1	5	-5.772	2.142
Nmd3	5	-5.772	2.142
Rad51ap2	5	-5.772	2.142
Rbm19	5	-3.4012	2.1408
Atp6v0e	5	-0.9526	2.13971
Hmcn1	5	-2.2479	2.13971
Camsap3	5	-4.1484	2.13829
Lyz1	5	-1.1653	2.13806
Pank4	5	-0.32847	2.13806
Olfr1090	5	0.40922	2.13806
Arhgap44	5	-1.6457	2.13799
Cd53	5	-4.6343	2.13643
Gm853	5	-2.5128	2.13617
St8sia6	5	-3.952	2.13503
1700001J03Rik	5	-2.0665	2.13486
Ipo13	5	-2.2704	2.13429
Uxs1	5	-1.2528	2.13422
Hsd17b3	5	-4.6242	2.13422
Gpr22	5	3.5259	2.15781
Tmed7	5	1.2712	2.13416
Fau	5	-2.0266	2.13336
Vps51	5	-3.2009	2.13113
Nup93	5	-1.6861	2.13108
Psma3	5	-2.4092	2.13065
Pmpcb	5	-5.4621	2.13019
Ces1g	5	-3.841	2.12936
Tmem65	5	-2.2761	2.12926
Lrpap1	5	-0.8237	2.12926
Cetn3	5	-3.763	2.12668
Blzf1	5	-3.1474	2.12646
Unc13d	5	-2.2407	2.12644
Gpatch1	5	-5.7602	2.12614
Ranbp3	5	-5.7602	2.12614
D2Wsu81e	5	-5.7181	2.12382
Ehd3	5	-2.4685	2.12324
Gpr15	5	1.9681	2.12321
Hs3st3a1	5	-0.58513	2.12321
Olfm1	5	0.63295	2.12192
Ccny	5	2.2614	2.12192
Dpf2	5	1.2154	2.12192
Get4	5	-4.2886	2.12093
Mup5	5	-1.9646	2.11719
Gnmt	5	-2.9468	2.11665
Irgm2	5	-1.9292	2.11665
Arl1	5	-5.2629	2.11665
Btbd18	5	-2.696	2.11608
Sprr4	5	-3.6273	2.11386
Ciao1	5	-1.8519	2.11264
Cdc25a	5	-1.7332	2.11264
Rpap3	5	-5.7483	2.11255
Oip5	5	-5.7483	2.11255
1110004F10Rik	5	-3.0136	2.11228
Olfr509	5	-5.0062	2.10986
Olfr632	5	-3.1446	2.10986
Clec9a	5	-3.1514	2.10986
Hacd2	5	-2.4755	2.10986
Olfr640	5	-2.3667	2.10816
Col5a1	5	2.275	2.10613
Ubr5	5	1.0701	2.10613
Zar1	5	-0.74841	2.10613
Cd209g	5	-5.7423	2.10577
Nsl1	5	-3.2499	2.1052
Gm2027	5	-3.2455	2.10439
Tm4sf5	5	-0.92918	2.10422
Wbscr28	5	-2.7999	2.10422
Zranb1	5	-2.1569	2.10348
1700019B03Rik	5	-1.6509	2.10329
Ramp1	5	-1.765	2.10072
Wfdc5	5	-1.7411	2.09935
Vmn1r124	5	-5.7363	2.09922
Nasp	5	-0.48648	2.09844
Dok3	5	-3.6719	2.09746
Iglv3	5	-4.2205	2.09727
Pcdha3	5	-3.6554	2.09727
Ubfd1	5	-2.1154	2.09727
Trappc4	5	-1.5681	2.09727
Polr1b	5	-2.5698	2.09497
Mpp1	5	-1.3786	2.09465
Mycs	5	-3.1127	2.09439
Plrg1	5	-2.2489	2.09414
Upp1	5	-3.0275	2.09395
Acbd5	5	-2.932	2.09241
Bik	5	-5.7303	2.0924
A930009A15Rik	5	-5.7303	2.0924
Eif3d	5	-5.7303	2.0924
Usf2	5	-5.7303	2.0924
Hist1h4c	5	-2.142	2.09089
Sfxn1	5	-4.002	2.0901
Cdc42bpb	5	-2.7286	2.0901
Qsox2	5	0.69809	2.0901
Usp7	5	-1.3673	2.08952
Ifitm2	5	-5.109	2.08806
8030411F24Rik	5	-5.7242	2.08651
4932414N04Rik	5	-5.7242	2.08651
Ift57	5	-5.7242	2.08651
Zfp94	5	-5.7242	2.08651
Gon4l	5	-3.7958	2.08604
Bcas1	5	-5.3444	2.08604
Ap2s1	5	-2.4843	2.08593
Mrgprh	5	-3.4101	2.08512
4932438A13Rik	5	0.44456	2.08225
Tmem209	5	2.6954	2.08225
Kif20a	5	-5.7181	2.081
Gtf2a1	5	-5.7181	2.081
Bcas2	5	-5.7181	2.081
Tmem30a	5	-1.7276	2.08069
Plg	5	-2.0947	2.08058
Olfr922	5	-3.3875	2.07914
Igsf23	5	-2.2805	2.07914
Cnih2	5	-2.8692	2.07914
Gpaa1	5	-0.61007	2.07914
Rgs19	5	-3.6398	2.07914
Bst1	5	-3.7781	2.07894
Nutf2	5	-5.5639	2.07762
Gstt1	5	2.0298	2.07618
Toe1	5	-1.8699	2.07522
Git1	5	-3.8004	2.07437
Dse	5	-3.8175	2.07377
Thoc7	5	-5.0569	2.07348
Prdm10	5	-5.3444	2.07303
Rbm46	5	-4.3476	2.07229
Rxrb	5	-1.8381	2.0711
Igkv12-44	5	-4.3515	2.07074
Btbd1	5	3.6352	2.07019
Cacng3	5	1.413	2.07019
Nlrc3	5	-5.7059	2.06779
Hars	5	-4.4874	2.0674
Arl5b	5	-0.79295	2.0674
Slc25a37	5	-1.224	2.0674
Siglecf	5	-1.5721	2.0674
Adat2	5	-1.9613	2.06697
Cfl2	5	-5.5226	2.06646
Prpf31	5	-3.3741	2.06558
Manea	5	-3.0902	2.06349
Mitd1	5	0.31646	2.06311
Upp2	5	-1.5526	2.06302
Zfp182	5	-4.6177	2.06201
Aig1	5	0.0074146	2.06153
Uck1	5	-1.1508	2.06153
Mob4	5	-5.112	2.06153
Ms4a5	5	-1.6779	2.06153
Chpf2	5	-2.829	2.06126
Gm10548	5	-5.6997	2.06036
Tceanc	5	-2.4944	2.05763
Necab1	5	-1.4845	2.05742
Patz1	5	0.7321	2.05731
Ccdc178	5	-5.4138	2.0562
Vmn2r27	5	-2.9841	2.05555
3110002H16Rik	5	0.11918	2.05493
Ggct	5	-5.0786	2.05493
Fbxo30	5	-0.037905	2.05493
Tmem54	5	0.017124	2.05493
Slc26a10	5	2.0678	2.05493
Snrnp48	5	-5.0761	2.05343
Psmb1	5	-2.9373	2.05157
Scyl2	5	-0.25965	2.05157
Nubp2	5	-2.3437	2.05157
Sdr9c7	5	2.2663	2.05157
1700010D01Rik	5	-5.3987	2.05138
Olfr374	5	-0.50361	2.0494
Olfr820	5	-1.1701	2.0494
Supt6	5	-4.5237	2.04905
Rps13	5	-5.6873	2.04721
Olfr860	5	-5.6873	2.04721
Taf6	5	-5.6873	2.04721
Timm17a	5	-5.6873	2.04721
Eif3a	5	-1.8194	2.04707
Smc3	5	-0.14524	2.04479
Amd2	5	-5.103	2.04417
Fbxo16	5	-2.5191	2.04353
Fam132b	5	-2.5118	2.04353
Fbxo28	5	-3.0304	2.04353
Gpr107	5	-1.2193	2.04353
Ralgps1	5	-1.724	2.04353
Ctps2	5	-0.75213	2.04353
Slc35e2	5	-2.9158	2.0423
Kat2b	5	-0.053837	2.04145
Rpl14	5	-2.9666	2.04125
Olfr1391	5	-5.6811	2.04081
Crabp1	5	-3.5367	2.04028
Krt9	5	-2.9355	2.03923
Polr2a	5	-2.4161	2.03812
Gjc2	5	-2.5643	2.03607
Il17rb	5	-1.5445	2.03607
Gm49450	5	0.039217	2.03607
Sgcb	5	0.16724	2.03607
Psma1	5	-1.7787	2.03534
Snph	5	-1.9335	2.03507
Tma16	5	-5.6748	2.03483
Dhx16	5	-5.6748	2.03483
Scgb2b3	5	-5.6748	2.03483
Sox17	5	-5.6748	2.03483
P4hb	5	0.75059	2.03373
Ap1b1	5	1.213	2.03373
Ppan	5	-3.4283	2.03273
Bnip3l	5	3.487	2.02938
Tmem88	5	-5.0094	2.02929
Pmvk	5	-2.591	2.02929
Wdr74	5	-5.6685	2.02883
Zfp607	5	-5.6685	2.02883
Sdc4	5	-2.0287	2.02853
Iscu	5	-3.9329	2.02852
Tmem236	5	-4.228	2.02788
Hey2	5	-2.9981	2.02767
Praf2	5	-2.6687	2.02666
Prss34	5	-3.3955	2.0266
Wdr11	5	0.26367	2.024
Vars	5	-3.6059	2.02346
Lamp3	5	-4.0317	2.02332
Scgb1b30	5	-5.6622	2.02286
Ahctf1	5	-5.6622	2.02286
Zxdb	5	-5.6622	2.02286
Pbsn	5	-3.4896	2.02245
Daglb	5	-2.4474	2.02237
Athl1	5	-2.7247	2.02149
Bcdin3d	5	-0.76065	2.01975
Rangap1	5	0.16056	2.01975
Agr2	5	-1.3699	2.0187
Acat3	5	-3.9395	2.01767
Rnf19a	5	-2.7789	2.01731
Atp8a1	5	-3.1914	2.01726
Slc38a3	5	-2.8049	2.01726
Zfp87	5	-2.5216	2.01715
Mt1	5	-1.4113	2.01618
Ctsc	5	-3.7749	2.0154
Wee2	5	-0.47729	2.01345
Gtf3c2	5	-3.2327	2.01216
Olfr129	5	-2.3963	2.01187
Snapc3	5	-2.5359	2.0112
3110009E18Rik	5	-3.5088	2.01092
Pgm5	5	-0.29831	2.01027
Grk1	5	-1.6667	2.01027
Slc19a3	5	-1.1075	2.01027
Arl5a	5	-2.6515	2.01027
Chrnd	5	-3.3744	2.01027
Snapc2	5	-4.0006	2.00992
Dgkg	5	1.154	2.00827
Ppp2r5b	5	-1.0861	2.00827
Tbca	5	-2.5432	2.00825
Zdhhc23	5	-4.604	2.0064
Gm6525	5	-2.9106	2.00577
Carkd	5	-3.5334	2.0049
Rpl36	5	-3.197	2.00417
Lsg1	5	-5.6431	2.0041
Nol7	5	-5.6431	2.0041
Fam134a	5	0.07742	2.00315
Kars	5	-1.3999	2.00315
Cbr3	5	-3.2599	2.00315
Gpha2	5	-3.2454	2.00238
Bcan	5	-2.7477	2.00238
Saa4	5	0.062057	2.00238
Fgfbp1	5	-5.4384	2.00238
Olfr225	5	-0.27018	2.00238
Trim30c	5	2.3721	2.00238
Pebp1	5	-4.3797	2.00161
Rnd2	5	-2.7055	1.99809
Gm5481	5	-5.6366	1.99762
Cdc45	5	-5.6366	1.99762
Nipbl	5	-5.6366	1.99762
Zwilch	5	-5.6366	1.99762
Tpm2	5	-5.6366	1.99762
Tmem163	5	-1.7478	1.99589
Wsb2	5	-2.9283	1.99589
Gpr37l1	5	3.3566	1.99589
Dsc1	5	-3.5064	1.99589
Fam104a	5	-3.5828	1.99589
Ndufs7	5	-3.8979	1.99443
Olfr178	5	-2.0057	1.99426
Rftn1	5	-0.81983	1.99409
Ewsr1	5	-0.70739	1.99409
Terf1	5	-5.6171	1.99336
Nop58	5	-1.6849	1.99259
Fancm	5	-5.6302	1.99191
Mcm10	5	-5.6302	1.99191
A630010A05Rik	5	-5.6302	1.99191
Orc1	5	-4.1012	1.9914
Cldn19	5	-1.9305	1.99055
Dis3l2	5	-0.89485	1.99012
Hsp90aa1	5	-0.93052	1.99012
Oit1	5	-2.924	1.98991
Pcdh1	5	-3.4702	1.98906
Rps8	5	-2.808	1.98873
Morn5	5	-5.6237	1.98661
Ankrd11	5	-5.6237	1.98661
Birc5	5	-3.1923	1.98619
Sema7a	5	-1.2434	1.98619
Col12a1	5	5.1592	2.17584
Slc2a6	5	-3.9592	1.9841
CAAA01118383.1	5	0.9427	1.9841
Ccr8	5	-0.93991	1.9841
Tspan17	5	0.46154	1.9841
Slc12a3	5	-2.9126	1.9841
Ppm1a	5	0.015564	1.98326
Hp1bp3	5	-5.6171	1.98068
Gm9736	5	-5.6171	2.22431
Zpr1	5	-5.6171	1.98068
Eif6	5	-5.6171	1.98068
Asphd1	5	-3.8067	1.98051
Riok1	5	-3.3899	1.98034
Nkx3-2	5	-4.552	1.97943
Wipi1	5	-0.3516	1.97939
Atp8b4	5	0.084582	1.97939
Wdr76	5	-1.715	1.97939
Psmb7	5	-2.6833	1.97889
Defb30	5	-1.0503	1.97732
Armcx6	5	-3.0784	1.97675
Ctnnd2	5	-0.50754	1.9765
Gm10488	5	-5.6106	1.9758
Uncx	5	-5.6106	1.9758
Nol11	5	-5.6106	1.9758
Tomm70a	5	-2.6208	1.97433
Tmem63c	5	-4.3099	1.97433
Glipr1	5	-3.4225	1.97433
Ncoa1	5	-0.93608	1.97367
Upk3b	5	-2.8703	1.972
Sgol2a	5	-5.604	1.97167
Sub1	5	-5.604	1.97167
Myzap	5	-5.604	1.97167
Sult2a6	5	-3.0194	1.97029
Gstm1	5	-2.0215	1.97013
Eftud1	5	-1.2363	1.96867
Heatr6	5	-2.3208	1.96819
Vkorc1l1	5	-1.436	1.96807
Pigv	5	-0.95205	1.96807
Mageb2	5	0.47486	1.96807
Baiap2	5	-0.2076	1.96807
Olfr31	5	-2.0287	1.96807
Fam73a	5	-3.6393	1.96807
Nrg3	5	-1.0805	1.96799
Pknox2	5	-1.0158	1.96786
Mbd4	5	-5.5974	1.96678
Spin2-ps1	5	-5.5974	1.96678
Sp4	5	-5.5974	1.96678
Nop16	5	-5.5974	1.96678
Vmn2r96	5	-5.4801	1.96477
Pfn1	5	-2.5793	1.96397
Nedd9	5	-4.0995	1.96381
Nsf	5	-5.2521	1.96329
BC048507	5	-2.2181	1.96261
Fgf17	5	-0.00092271	1.96241
Cyc1	5	2.0264	1.96241
Ager	5	0.077167	1.96241
Mrps36	5	-3.3134	1.96229
Spns1	5	-1.1116	1.96138
Prss16	5	-0.4031	1.96138
Kng1	5	-1.31	1.96138
Vps18	5	-3.5485	1.96138
Mmrn2	5	-0.13192	1.96138
Wfdc1	5	-3.5219	1.96138
Slc44a5	5	-3.385	1.96138
Gbf1	5	-5.5907	1.96134
Zfp558	5	-5.5907	1.96134
Fam103a1	5	-5.5907	1.96134
Rpl36a	5	-5.5907	1.96134
Vmn1r192	5	-5.5907	1.96134
Atp6v0d1	5	-3.0136	1.95999
Btbd16	5	-1.5209	1.95916
Cecr6	5	-2.4792	1.95837
Tango6	5	-2.6247	1.9579
Mir199a-2	5	-3.2404	1.95754
Tigit	5	-2.1062	1.95679
Snapc4	5	-5.5841	1.95628
H2al2a	5	-5.5841	1.95628
Nuf2	5	-5.5841	1.95628
Tirap	5	-0.73682	1.95597
Sprtn	5	-1.0247	1.95597
Mamstr	5	-2.6876	1.95581
Olfm3	5	-3.0945	1.95499
Phykpl	5	-2.8742	1.9546
Spink14	5	-0.71015	1.9546
Plin4	5	0.6955	1.9546
Pacsin3	5	1.8744	1.9546
Svs3a	5	3.0011	1.9546
Sars	5	-3.8044	1.95409
Slc30a1	5	1.3539	1.95234
Itgb1bp1	5	0.97236	1.95234
Guca2a	5	-2.7907	1.95234
Eml6	5	-3.0136	1.95202
Gm37013	5	-5.5774	1.95167
Usp8	5	-1.662	1.94966
Zfp711	5	-5.3044	1.94927
Pdcd2l	5	-3.2138	1.94881
Slc1a5	5	-3.0275	1.94881
Ttc17	5	0.61941	1.94881
B3gnt9	5	-2.5043	1.94881
Slc39a7	5	-3.7781	1.94881
Cul1	5	-0.84744	1.94784
Adi1	5	2.629	1.94784
Fut2	5	-2.5129	1.94769
Ccdc86	5	-2.6514	1.94731
Gm21975	5	-5.5706	1.94681
Nhej1	5	-2.4298	1.94661
Olfr705	5	-3.0448	1.94516
Accs	5	-2.9952	1.94374
Catsper1	5	1.4941	1.94374
Tmem158	5	-1.7982	1.94374
Unc5c	5	-2.5045	1.94374
Pdgfa	5	-2.2419	1.94336
Xpo1	5	-3.0724	1.94245
Gpr83	5	-3.2394	1.94199
Psmd1	5	-3.0703	1.94146
Vmn1r196	5	-1.5358	1.94142
Lman1	5	-1.9864	1.94044
Rcbtb1	5	-1.4191	1.93983
Npy	5	2.4052	2.27471
Mospd1	5	-2.8984	1.93983
Slc16a7	5	-2.7671	1.93915
Gpr141	5	-4.4196	1.93915
Scn1b	5	-2.8354	1.93915
Rhbdl2	5	-4.0203	1.9384
Prpf4b	5	-1.7562	1.93723
Prl7a1	5	-1.9903	1.93652
Ppapdc1a	5	-2.6361	1.93491
Tmem143	5	2.216	1.93491
Hgs	5	-0.21172	1.93491
Cntnap4	5	-2.0428	1.93491
Wfdc3	5	-2.577	1.93427
Rsl1d1	5	1.569	1.93375
Ddx23	5	-1.9026	1.93278
Tigd5	5	-5.5502	1.93278
Rps6	5	-5.5502	1.93278
Vmn1r80	5	-5.5502	1.93278
Nxph1	5	-2.7969	1.93152
4933427D06Rik	5	-3.4739	1.92963
Nbas	5	-2.5328	1.92959
Olfr24	5	0.40744	1.92944
Polr2g	5	-3.2454	1.92944
Svs2	5	-1.4363	1.92919
Zfp362	5	-2.0349	1.92819
Olfr450	5	-5.5434	1.92815
Gm12669	5	-5.5434	1.92815
Tbc1d10b	5	-5.5434	1.92815
Scarna10	5	-5.5434	1.92815
Nagpa	5	-4.1673	1.92797
Dcaf12l2	5	-3.768	1.92702
Rab11fip4	5	-3.3347	1.9246
P4ha2	5	1.6934	1.92431
Rab1	5	-0.81483	1.92431
Plscr3	5	-1.4151	1.92387
Olfr1238	5	-2.4201	1.92387
Olfr678	5	-3.5717	1.92387
Dhx33	5	-1.606	1.92369
Cfap54	5	-5.5365	1.92325
Gm4763	5	-5.5365	1.92325
Rpl27	5	-5.5365	1.92325
1700011A15Rik	5	-1.8829	1.92191
Kndc1	5	-3.5556	1.92169
Ttc4	5	-2.7498	1.92111
Tex264	5	-2.4568	1.91991
Proser1	5	-5.5295	1.91876
Dopey2	5	-5.5295	1.91876
Abt1	5	-2.2103	1.91851
Kat8	5	0.13187	1.91844
Ppp6r3	5	-0.95688	1.91844
Tspan32	5	-2.2894	1.91808
Hgd	5	-2.3854	1.91808
Fads3	5	-1.5788	1.91643
Olfr1314	5	-3.1098	1.91625
Tspyl3	5	-2.6824	1.915
Cdkn2aip	5	-5.5226	1.91482
Rsrc1	5	-5.5226	1.91482
Wibg	5	-5.5226	1.91482
Crhr2	5	-4.892	1.9146
Fkbp10	5	-1.9172	1.91457
Gm5114	5	-2.9576	1.91442
Srebf1	5	-0.0039823	1.91428
Ube4b	5	0.13077	1.91428
Sf3b5	5	-3.3668	1.91368
Abcb11	5	-3.5316	1.91254
Rrad	5	1.5958	1.91254
Sema6d	5	-2.3327	1.91254
Olfr1425	5	-3.2547	1.91193
Snrnp200	5	-1.715	1.9119
Polr3f	5	-0.98545	1.91179
Ahsg	5	-2.648	1.91059
Olfr380	5	-4.9046	1.91024
Esco2	5	-2.8924	1.90964
Hmmr	5	-1.0548	1.90914
Oit3	5	-1.0129	1.9077
Plcb4	5	-0.21559	1.9077
Abhd3	5	-1.886	1.90682
Ido2	5	0.21844	1.90682
Nek8	5	-0.10662	1.90682
Cd59b	5	-2.4667	1.90682
Gtf3c5	5	-5.5085	1.90644
Prelid1	5	-5.5085	1.90644
Aebp2	5	-5.5085	1.90644
Rbms3	5	-5.5085	1.90644
Smarca1	5	-2.7412	1.90591
Myo1h	5	-2.6137	1.90549
Sdk2	5	0.22772	1.90525
Fam219a	5	-5.5015	1.90292
Heph	5	-2.8818	1.90264
Atp6v1g1	5	-2.2138	1.90253
6430571L13Rik	5	-2.58	1.9025
C1galt1c1	5	1.3374	1.90201
Camkk1	5	0.25465	1.90201
Dhtkd1	5	-3.9535	1.90177
Mrps10	5	-2.997	1.90139
Naprt	5	-2.9374	1.90125
Ric8b	5	-3.753	1.90049
Clgn	5	-5.4944	1.89977
Ifi204	5	-5.4944	1.89977
Cbx1	5	-5.4944	1.89977
Ccdc77	5	-1.1812	1.89842
Sprr2a1	5	-1.8946	1.89842
Mettl22	5	-1.0724	1.89801
Ppp2r1a	5	-3.0273	1.89801
Golga1	5	-0.38044	1.89681
Vmn2r19	5	-5.4872	1.89633
Ica1	5	-2.6507	1.89589
Wbscr22	5	-0.45891	1.89565
Cdhr4	5	-2.7791	1.89459
Mtarc2	5	-3.5069	1.89435
Slc25a32	5	-2.5666	1.89316
Prss29	5	-2.3357	1.89262
Zfp839	5	-2.06	1.89245
C1s1	5	1.0526	1.89225
Car5a	5	-3.0872	1.89225
Gpr161	5	-1.724	1.89225
Olfr994	5	-5.0318	1.89225
Ccdc167	5	-1.8214	1.89225
Hfe2	5	-3.7055	1.89225
Tmem215	5	-3.0414	1.89154
Olfr1181	5	-1.3962	1.89062
Tmem39a	5	-1.3231	1.89019
Wnt9a	5	2.3743	1.89012
Lsm5	5	-2.8154	1.88854
Thada	5	-5.4728	1.88847
Dsn1	5	-5.4728	1.88847
Gm11837	5	-1.6994	1.88756
Spc24	5	-4.0727	1.88739
Cpne4	5	0.12073	1.88733
Snap25	5	-2.7046	1.88733
Lalba	5	-1.991	1.88733
Zdhhc11	5	-3.3843	1.88726
Psd3	5	-2.5911	1.88699
Cmtr2	5	0.22224	1.88699
Mroh5	5	-1.4692	1.88656
Olfr197	5	-2.9293	1.88526
Mrpl55	5	-5.4656	1.88512
Rpl12	5	-5.4656	1.88512
9530068E07Rik	5	-1.1355	1.88429
Tnfaip8l3	5	-3.8644	1.88419
Slit1	5	-0.59251	1.8826
Bricd5	5	-0.39553	1.8826
Sema6b	5	-0.82824	1.8826
Kctd12	5	-3.6988	1.8826
Dnajc6	5	-3.4263	1.8826
Gbe1	5	-0.091813	1.8826
Bag3	5	-0.58451	1.88236
Mapk8	5	-1.2306	1.88236
Tet3	5	-5.4583	1.88207
Rilpl2	5	-5.4583	1.88207
Gatad2a	5	-5.4583	1.88207
Olfr390	5	-3.3325	1.88084
Lsm7	5	-3.2058	1.88081
Dnah7c	5	-2.2167	1.87976
Cacna1s	5	0.55099	1.87929
Snapin	5	-0.83974	1.87929
Kcnk4	4	-3.9114	1.87916
Rpusd1	5	-5.451	1.8788
Mtrf1	5	-5.451	1.8788
Ubtf	5	-5.451	1.8788
Slc39a2	5	-1.5877	1.87837
Kera	5	-1.8679	1.87837
Gpr152	5	-1.1902	1.87824
Mb	5	0.18338	1.87824
Cyb5r1	5	-0.66336	1.87824
Olfr659	5	-0.1324	1.87824
Atp6v0a2	5	-2.2536	1.87824
Cdc27	5	-2.2492	1.87719
Ube4a	5	5.7562	2.46921
Jak1	5	0.14214	1.87625
Cenpn	5	-5.4436	1.87589
Commd7	5	-5.4436	1.87589
Eif1ad	5	-5.4436	1.87589
Gipc2	5	-5.4436	1.87589
Rela	5	-0.26386	1.874
Acmsd	5	-1.1913	1.8739
Oxgr1	5	0.09037	1.87361
Unc45a	5	-5.4363	1.8729
Pabpc1	5	-5.4363	1.8729
Tmpo	5	0.61464	1.87099
Pomk	5	-2.517	1.87028
Vars2	5	-1.8664	1.87028
Amy1	5	-4.0472	1.86996
Blvra	5	-2.6323	1.86983
Clip3	5	-2.2438	1.86944
Gmnc	5	-5.4288	1.86925
Olfr584	5	-5.4288	1.86925
Pabpc4	5	-5.4288	1.86925
Pcdha9	5	-2.6009	1.86896
Syt9	5	-3.9101	1.86896
Slc35c2	5	-1.3094	1.86896
Zfp612	5	-5.4138	1.86867
Slc25a2	5	-5.2629	1.86848
Parg	5	-5.3987	1.86732
Cemip	5	1.6445	1.86652
Usp5	5	-0.63443	1.86652
Pou5f1	5	-5.4214	1.86643
Padi6	5	-2.7708	1.86582
BC052040	5	-2.5673	1.86493
Sardh	5	-2.6737	1.86474
Pyroxd1	5	-1.559	1.86461
Zyg11a	5	1.4853	1.86458
Olfr27	5	-3.7323	1.86458
Gyltl1b	5	-2.2675	1.86458
Dusp27	5	2.2871	1.86458
Tmem45a	5	-0.7915	1.86458
Osbpl11	5	-2.5648	1.86455
Klhl21	5	4.4029	2.75031
Zfp420	5	-5.4138	1.86356
Tmem170b	5	-3.4295	1.86306
Cyct	5	-3.833	1.86176
Ndc1	5	-1.5934	1.86173
Olfr996	5	-3.2893	1.86113
Rpl34	5	-1.9108	1.86062
Tceb2	5	-1.8011	1.86062
Prss32	5	-5.4063	1.86031
G6pd2	5	-1.6059	1.86012
Cklf	5	-1.7178	1.86012
D16Ertd472e	5	-4.4623	1.86012
Atp5h	5	-2.934	1.85899
Fam221a	5	-1.3256	1.85886
Olfr427	5	-5.3987	1.8578
Pum1	5	-5.3987	1.8578
Cadm4	5	-1.5652	1.85724
Gcm1	5	-3.1688	1.8567
Ggt6	5	-2.696	1.8563
Mospd2	5	-3.6469	1.85549
Olfr972	5	-5.3911	1.85549
Olfr523	5	-5.3911	1.85549
Rhox10	5	-5.3911	1.85549
Olfr701	5	-3.1989	1.85546
Plp2	5	1.2727	1.85546
Foxl1	5	-2.9874	1.85471
Chrm2	5	1.2715	1.85409
Setd2	5	-1.6845	1.85409
Hspb1	5	2.9801	1.85409
Epn3	5	1.0377	1.85409
Cpsf3	5	-1.8298	1.85372
Ccdc67	5	-1.1735	1.85334
Zc3h8	5	-5.3834	1.85304
Stra6	5	-3.1496	1.85152
Iglon5	5	-1.5266	1.85134
DXBay18	5	-2.9656	1.85103
Olfr569	5	-4.6447	1.85093
Ccbl2	5	-1.8793	1.85093
Slco5a1	5	-1.7176	1.85093
Tmem27	5	-2.7101	1.85093
Ube2u	5	-3.1604	1.85093
Nlrp4b	5	-5.3757	1.85041
Gm13695	5	-5.3757	1.85041
Zrsr2	5	-5.3757	1.85041
Btbd35f11	5	-5.3757	1.85041
Lgals3bp	5	-4.0093	1.8497
Nfkbiz	5	-1.9471	1.84906
Emilin2	5	-2.4143	1.84814
Rprd1a	5	-5.368	1.84744
Sec23b	5	-5.368	1.84744
Gm438	5	-5.368	1.84744
Uaca	5	-5.368	1.84744
Phb2	5	-2.393	1.84686
Olfr299	5	-2.8942	1.84585
Dio3	5	-0.69221	1.84585
Fam20c	5	-2.601	1.84585
Abca1	5	-3.243	1.84585
Zdhhc22	5	-2.0842	1.84585
Chsy1	5	2.0744	1.84555
Rnase6	5	2.5717	1.84555
Clic3	5	0.32019	1.84555
Las1l	5	-5.3602	1.84494
Polr2e	5	-4.292	1.84482
Mcoln2	5	-2.9108	1.84336
Itpripl2	5	-1.4528	1.84248
Tex16	5	-2.5402	1.84212
Nhp2l1	5	-2.1027	1.842
Sycp3	5	-2.9755	1.84152
Dctpp1	5	-2.0761	1.84116
Lsm8	5	-1.9076	1.84055
Rasal2	5	-5.3444	1.84025
Akirin2	5	-5.3444	1.84025
Gm561	5	-5.3444	1.84025
Rin3	5	-5.3444	1.84025
Atp6v0c	5	-3.2126	1.84025
Rtp3	5	-1.7711	1.83971
Olfr1289	5	-3.2161	1.83971
Gm15293	5	-2.1009	2.38117
Cldn18	5	-1.4566	1.83971
Cnih3	5	-1.5429	1.83971
Mthfd2l	5	-4.198	1.83971
Gm20521	5	-1.2858	2.23441
Zdhhc14	5	-2.3151	1.83824
Tmprss11b	5	-3.3102	1.83815
Ifi47	5	-5.3365	1.83809
Smarcad1	5	-1.673	1.83758
Olfr10	5	-1.7946	1.83744
Slc26a7	5	-0.86486	1.83729
Ddx19a	5	-3.1586	1.83717
Cypt15	5	-1.0838	1.83711
Ehbp1	5	-2.9682	1.83636
Phyhipl	5	-5.3286	1.83606
Sult2a4	5	-2.6824	1.83586
Pola1	5	-2.4392	1.8349
Bub1b	5	-3.1419	1.8344
Nr1d2	5	0.27438	1.8344
Slc35d2	5	-1.663	1.83428
Ephx3	5	-2.852	1.83428
Ube2j2	5	-2.4336	1.83428
Slc9a4	5	-2.2517	1.83428
Bpifb2	5	-1.3586	1.83401
Ubtd2	5	-3.6393	1.83395
Lrriq3	5	-5.3125	1.83192
Ncald	5	-1.4758	1.83174
Anapc7	5	2.225	1.83168
Tjp2	5	0.8134	1.83168
Phldb2	5	-1.628	1.83118
Farp2	5	-5.3044	1.83027
Olfr1154	5	-2.1368	1.83024
Folr2	5	-1.2197	1.8295
Kbtbd12	5	1.8572	1.8295
Olfr1206	5	0.93518	1.8295
Was	5	-4.1569	1.8295
Slc39a11	5	-0.2734	1.8295
Smpd3	5	-1.3696	1.82942
Olfr1215	5	-1.3943	1.82871
Tcf7	5	-5.2963	1.82851
Adcy8	5	0.4345	1.82827
Rpl24	5	-1.7752	1.82813
Ciapin1	5	-5.2881	1.82708
Cinp	5	-2.6438	1.82681
Cct2	5	-1.2842	1.82678
Rab4b	5	-2.696	1.82562
Ankrd17	5	-2.8199	1.82536
Rhou	5	-1.4748	1.82475
Fundc1	5	-1.8238	1.82437
Mst1r	5	-2.6661	1.82426
Dedd2	5	-4.925	1.82426
Pcdha7	5	-3.4484	1.82426
Slc5a10	5	-3.3971	1.82426
Tmem116	5	-2.5213	1.82426
Fbxo40	5	-1.8522	1.82426
Tmem87a	5	-1.5926	1.82426
Wrb	5	-2.898	1.82414
Cryzl2	5	-3.6077	1.82408
Mbip	5	-2.3295	1.82362
Hnrnpa2b1	5	-1.8499	1.82275
Pla2g2f	5	-0.0209	1.8222
Esrra	5	0.57194	1.8222
Usp16	5	2.0696	1.8222
Gab3	5	-5.2632	1.82192
Arhgap20	5	-2.2733	1.82048
Srgap1	5	-5.2548	1.82013
D19Bwg1357e	5	-5.2548	1.82013
Nxpe4	5	-3.7247	1.81956
Unc5b	5	-4.1003	1.81933
Cox6c	5	-3.0366	1.81933
Wfdc13	5	0.098713	1.81933
Dhodh	5	-2.8711	1.81933
Cep57	5	-5.2464	1.81856
Olfr881	5	-1.8345	1.81684
Comp	5	-3.4802	1.81673
Arglu1	5	-5.2379	1.81664
Tgs1	5	-2.4474	1.81625
Ipo8	5	0.41145	1.81556
Vti1b	5	0.32594	1.81556
Pcna	5	-2.6688	1.81556
Olfr330	5	2.1826	1.81556
Dhx15	5	-5.2294	1.81517
Olfr1031	5	0.87949	1.815
Gphb5	5	-1.7343	1.815
1700028P14Rik	5	-0.94572	1.815
Lrba	5	-4.6856	1.815
Olfr600	5	0.94747	1.815
Nelfa	5	-1.5161	1.81389
Krt36	5	-4.0524	1.81372
Sptbn4	5	-1.596	1.81304
Fer1l6	5	-3.5931	1.81237
Zfp280c	5	-5.2035	1.81217
Nkap	5	-5.2035	1.81217
Wdr92	5	-1.4907	1.81197
Ehhadh	5	1.8202	1.81163
Gucy1a2	5	-1.4138	1.81163
Tmem255a	5	-4.2739	1.81099
Olfr750	5	-1.8557	1.81099
Adamtsl5	5	-4.7016	1.81099
Emc3	5	-2.485	1.81099
Ncor1	5	-5.1948	1.8109
Gm13693	5	-0.81934	1.81073
Akap17b	5	-3.8183	1.81023
Cyp2c69	5	-1.5819	1.80956
Supt5	5	-5.7142	1.80905
Nfat5	5	-3.0472	1.80905
Zfp37	5	-5.1771	1.80883
Nfyc	5	-5.1682	1.8076
Hdac2	5	-2.3562	1.80721
Uvssa	5	-5.1593	1.80707
Ckm	5	0.92087	1.8069
Fxyd4	5	-4.2181	1.8069
Cox7b	5	-5.057	1.8069
Calb1	5	-2.0134	1.80654
Mef2b	5	-5.1593	1.80629
Rad1	5	-2.5537	1.80585
Olfr789	5	0.014868	2.17888
Mnat1	5	-1.0172	1.80582
Cops8	5	-0.93781	1.80582
Slain2	5	-2.2091	1.80524
Rtbdn	5	-3.3263	1.8044
Pcdhb5	5	-2.4191	1.80435
Olfr1256	5	-5.1412	1.80424
Gkap1	5	-5.1412	1.80424
Ccdc108	5	-2.7458	1.80341
Gm11361	5	-3.3278	1.80302
Lsm2	5	-1.1416	1.80242
Zer1	5	-0.66849	1.80209
Ppa1	5	-5.4503	1.80209
Slc25a12	5	-3.5832	1.80209
Olfr96	5	-2.0072	1.80209
P4htm	5	-3.4848	1.80209
Serac1	5	-5.1229	1.80203
Tuba1c	5	1.7459	1.80134
Polr2d	5	1.1308	1.80134
Csnk1e	5	-1.2723	1.80134
Rps27rt	5	-5.1137	1.80099
Zscan4-ps3	5	-1.0092	1.80082
Ccdc94	5	-2.8341	1.80077
Gsdmc	5	-3.7574	1.80057
Gm20541	5	-5.095	1.79945
Gpr183	5	-2.0375	1.79836
Mpp7	5	-1.8845	1.79729
Olfr196	5	-3.0743	1.7971
Scrn1	5	1.7125	1.79691
P2rx6	5	0.37745	1.79691
Rab30	5	-3.2628	1.79691
Dhfr	5	-1.8618	1.79534
Iglv2	5	-3.0077	1.79531
Olfr559	5	-5.0473	1.79493
Dazap2	5	-5.0375	1.79393
Cpsf6	5	-5.0277	1.79266
Fbxw11	5	0.16999	1.79253
Eda2r	5	0.23968	1.79253
Hsf1	5	-0.48649	1.79253
Nop14	5	-3.3041	1.79177
Lamtor1	5	-1.7141	1.79121
Slamf9	5	-3.0803	1.78976
Fam199x	5	-1.4171	1.78971
Cox7a1	5	-1.9491	1.78936
Cox11	5	-4.3992	1.78936
1700016D06Rik	5	-4.9777	1.78936
Esp36	5	-2.4231	1.78885
Fam155a	5	-3.813	1.78787
Cdca2	5	0.4615	2.29741
Psma4	5	-2.8769	1.78757
Mrgprf	5	-3.6469	1.78725
Mgat4e	5	-2.7181	1.78712
1700001G17Rik	5	-4.9468	1.78651
Skint6	5	-4.9468	1.78651
Pwwp2a	5	-2.4718	1.786
Stxbp1	5	-5.5333	1.78595
Bbs4	5	0.075521	1.78571
Scgb3a2	5	-2.791	1.78547
Atp6v1h	5	-2.0231	1.78547
Mrgprd	5	-2.0413	1.78547
F11r	5	-4.0867	1.78547
Gjb1	5	-2.4099	1.78539
Kcnab3	5	-1.4512	1.78465
Hcfc1	5	-1.9198	1.78423
Nepro	5	-3.6148	1.78397
Gosr1	5	-2.8497	1.78397
Rpl38	5	-3.9679	1.78281
Rpl41	5	-3.289	1.78281
Rad51	5	-2.2732	1.78267
Tmem164	5	-2.1247	1.78254
Psmg2	5	-4.4989	1.78231
Crybb1	5	-1.1032	1.78175
Brd9	5	1.8963	1.78144
Fhit	5	-1.3286	1.78144
Olfr1220	5	-4.6389	1.7812
Plekha4	5	-0.43233	1.7807
Slc17a6	5	-1.7101	1.7807
Crat	5	-5.109	1.7807
Galntl6	5	-3.0332	1.7807
Kcnc3	5	-5.124	1.7807
Atg9a	5	-2.4128	1.7806
Prrg3	5	-1.3491	1.77984
Nrxn2	5	-5.4527	1.77966
Olfr223	5	-1.9076	1.7795
Tiparp	5	-0.91161	1.77945
C2cd5	5	-2.0208	1.7784
B3gat1	5	-3.1184	1.77757
Papss2	5	-4.7833	1.77736
Mall	5	-0.82312	1.77718
Vps36	5	-2.9659	1.77676
Gm10139	5	-3.1635	1.77635
Nme7	5	-4.1477	1.77619
Sike1	5	-1.5567	1.7757
Papd7	5	-2.7461	1.77567
St3gal2	5	-5.3003	1.77567
Adam22	5	-3.3347	1.77567
Bcam	5	-1.7248	1.77567
Tor2a	5	-0.46587	1.77567
Ccdc126	5	0.11507	1.77567
Zfp821	5	-4.8275	1.77565
Hnrnpk	5	-2.7634	1.77562
Taf12	5	-1.5249	1.77513
Abi3bp	5	-0.78513	1.77472
Fam71d	5	-2.7987	1.77469
Nol10	5	-2.0349	1.77448
Commd3	5	-4.4109	1.77441
Mau2	5	-4.8162	1.77441
4930447C04Rik	5	-4.8162	1.77441
Pelp1	5	-2.7445	1.77361
L3mbtl1	5	-0.1241	1.77361
Dscaml1	5	0.55249	1.77361
Ndfip1	5	-0.75668	1.77022
Lsmem2	5	-0.80535	1.77022
Fuca2	5	2.917	1.77022
Col13a1	5	-0.37651	1.77022
Lims2	5	-2.1871	1.77006
Ddb1	5	-2.2615	1.77006
Tiprl	5	-1.076	1.76981
Gpr108	5	-5.3546	1.76976
Khdrbs2	5	-2.3299	1.7696
Tomm40	5	-3.7273	1.76703
Wdr20	5	-4.7342	1.76688
Fndc3a	5	-3.4565	1.76536
Ap5s1	5	-0.52749	1.76536
Col5a2	5	-1.932	1.76536
Nrg2	5	-0.77472	1.76536
Acadsb	5	-1.0799	1.76518
Pdcd5	5	-4.7221	1.76513
Rps4x	5	-4.7221	1.76513
Vmn1r127	5	-3.0593	1.76513
Olfr558	5	-0.70548	1.76445
Ssh2	5	-1.3463	1.76445
Tpsb2	5	-1.5069	1.76445
Kncn	5	-1.4531	1.76445
Cdh18	5	-2.0035	1.76445
Itsn1	5	-4.7564	1.76445
Chrna5	5	-2.0594	1.76377
Smpx	5	-3.6807	1.76356
Bpifa3	5	-2.3916	1.76241
Yipf4	5	-5.2764	1.76163
Abhd17a	5	-4.0499	1.76148
Olfr926	5	-3.261	1.76148
Tubgcp4	5	-2.2158	1.7613
Rassf5	5	-1.3785	1.76015
Dlgap2	5	-3.0434	1.76005
Gpm6a	5	-2.3634	1.75968
Zfp518a	5	-1.3079	1.75945
Hsd11b2	5	-1.3303	1.7589
Tspan31	5	-1.983	1.7589
Pvrl2	5	-0.1121	1.7589
Tep1	5	-1.4779	1.7588
Prkcg	5	2.8993	1.75838
Smu1	5	-2.4636	1.75838
Adgrl3	5	-0.67223	1.75838
Insm1	5	-1.5677	1.75806
Serpina3i	5	-4.0474	1.75746
Slmo2	5	-5.1817	1.75624
Pcdhga7	5	-2.3625	1.75577
Pus10	5	2.0191	1.75493
Ifnl2	5	1.381	1.75493
Zfp825	5	-1.1212	1.75493
Nifk	5	-3.6483	1.75441
Trpm7	5	-0.96032	1.75419
Csrp2bp	5	-1.7024	1.75419
Ugt1a1	5	3.5838	1.75419
Pgbd5	5	4.147	2.72853
9530053A07Rik	5	-1.27	1.75419
Aspn	5	0.40291	1.75419
Naa38	5	-3.5626	1.75412
Stox1	5	-2.7532	1.75367
Adam21	5	-2.4104	1.7536
Tas2r130	5	-2.0989	1.75281
Cdc5l	5	-2.7369	1.75252
Chp1	5	-2.0057	1.75205
Pga5	5	-1.951	1.75136
Rsl24d1	5	-1.7042	1.75124
Aldh1b1	5	-0.99085	1.75046
Nup155	5	-2.6411	1.75041
Cnih4	5	-1.9854	1.75019
Tmem241	5	-3.9072	1.75019
Acpt	5	-1.9031	1.75019
C1qtnf3	5	3.8663	1.75019
[truncated: 19,383 more rows]

## Sheet: Fig3_Conventional_vitro
id	num	neg.lfc	minRRA.score
Pcna	5	-5.4911	12.1038
Rpl15	5	-6.4401	12.0929
Rpl37a	5	-6.1226	11.5562
Rpl8	5	-8.2914	11.2777
Nle1	5	-4.5658	11.2188
Dtl	5	-3.6432	11.1315
Ruvbl2	5	-4.6455	10.9815
Cct3	5	-4.943	10.93
Eef2	5	-5.7253	10.7943
Marchf5	5	-9.0615	10.2803
Polr1b	5	-4.3202	10.1168
Ddx56	5	-3.9952	10.1146
Hnrnpu	5	-4.2014	10.0564
Aurka	5	-4.5302	9.97906
Septin11	5	-9.3353	9.9404
Cdk4	5	-3.8649	9.88659
Rpl17	5	-5.956	9.87286
Kat5	5	-3.9308	9.84179
Ncl	5	-4.5064	9.82261
Pola2	5	-4.6414	9.81879
Rpl5	5	-5.0134	9.8017
Ddx41	5	-4.345	9.79792
Rpl27a	5	-6.1553	9.78848
Polr3h	5	-4.0447	9.76045
Hnrnpk	5	-5.298	9.74751
Eef1a1	5	-4.732	9.71999
Cct2	5	-4.1563	9.67669
Rpl9	5	-5.6289	9.6749
Gnb2l1	5	-4.9178	9.63423
Polr2e	5	-4.2316	9.61504
Kpnb1	5	-5.4776	9.60984
Prpf8	5	-4.7824	9.59774
Exosc10	5	-3.9745	9.58916
Rpl23a	5	-4.617	9.58059
Rrm1	5	-6.0015	9.57546
Rpl3	5	-4.4698	9.56187
Tut1	5	-3.9852	9.5551
Polr3b	5	-3.8599	9.5366
Psma5	5	-4.2569	9.52824
Abce1	5	-4.7781	9.52491
Rpl26	5	-5.4137	9.51991
Rpl23	5	-4.7262	9.50501
Chmp4b	5	-4.3891	9.50336
Nup93	5	-4.6511	9.46575
Eif2s3x	5	-4.5166	9.45766
Vhl	5	-3.6248	9.44638
Polr2f	5	-4.2389	9.40028
Srsf3	5	-4.7467	9.39086
Rpl19	5	-4.4856	9.35052
Cept1	5	-3.2659	9.33367
Ppp1cb	5	-4.1341	9.31544
Marchf7	5	-8.8246	9.26609
Rpl32	5	-5.6898	9.26313
Ssrp1	5	-3.3263	9.26166
Txnl4a	5	-3.6004	9.25576
Qars	5	-4.9357	9.23964
Usp39	5	-4.3978	9.2135
Nol9	5	-4.8226	9.20917
Pold1	5	-4.6292	9.19911
Farsa	5	-4.6973	9.19196
Ssu72	5	-3.9064	9.17629
Hspa5	5	-5.213	9.15793
Snrpd2	5	-3.6073	9.1523
Nhp2l1	5	-5.6086	9.1425
Rpl18	5	-4.1288	9.13414
Atp1a1	5	-2.7326	9.13136
Sod1	5	-3.7419	9.12997
Prpf4	5	-3.6093	9.12858
Polr2a	5	-3.365	9.12304
Atp2a2	5	-3.8763	9.10924
Plk1	5	-4.9434	9.10786
Taf1	5	-3.1906	9.09416
Vcp	5	-4.3655	9.07241
Psma7	5	-5.0287	9.0697
Cpsf3	5	-4.2806	9.067
Aldoa	5	-5.3267	9.05624
Fermt2	5	-3.2257	9.04553
Kif4	5	-3.7221	9.03885
Rps8	5	-4.51	9.03221
Rfc5	5	-3.7159	9.00319
Psmb4	5	-6.4854	8.99926
Phb2	5	-4.3435	8.99272
Gars	5	-4.4304	8.93356
Twistnb	5	-4.3306	8.9323
Mcm3ap	5	-2.8696	8.89086
Nxf1	5	-3.5163	8.88961
Usp36	5	-2.67	8.87599
Ect2	5	-3.7845	8.8563
Fau	5	-4.6244	8.8514
Ppan	5	-3.6557	8.84652
Txnrd1	5	-3.2914	8.83437
Alg1	5	-4.1424	8.83194
Espl1	5	-4.1365	8.82711
Chek1	5	-3.9762	8.8235
Polr2c	5	-4.0787	8.81147
Dkc1	5	-3.269	8.81102
Eif4e	5	-4.316	8.80189
Rpl37	5	-5.2714	8.79237
Mdm2	5	-3.6256	8.75582
Rrm2	5	-5.2088	8.75348
Psma3	5	-3.7294	8.75114
Snrnp40	5	-2.9648	8.7314
Cdc23	5	-4.5035	8.73025
Ppp2r1a	5	-2.3752	8.71643
Aars	5	-4.6709	8.71413
Rsl24d1	5	-3.7066	8.71184
Myc	5	-4.4882	8.7107
Nup85	5	-3.3136	8.70613
Polr2b	5	-4.1916	8.69815
Pola1	5	-4.8056	8.67099
Top3a	5	-3.8123	8.65864
Inpp5k	5	-2.9401	8.65754
Rpl11	5	-4.0573	8.6542
Cdk7	5	-3.8445	8.64306
Clns1a	5	-3.3159	8.63419
Polr2l	5	-5.1103	8.62538
Smu1	5	-5.6978	8.61658
Rps27	4	-4.5709	8.59758
Septin12	5	-8.5751	8.59477
Mepce	5	-4.4169	8.58503
Rplp2	5	-5.5492	8.57209
Psma4	5	-5.274	8.56994
Marchf3	5	-8.7066	8.55071
Cpsf1	5	-3.3137	8.54858
Upf1	5	-3.4572	8.54433
Psma6	5	-5.4237	8.53799
Uba52	5	-4.3131	8.53587
Psmb1	5	-5.346	8.53059
Eftud2	5	-3.7767	8.52849
Eif5a	5	-4.1293	8.50858
Nudc	5	-3.8114	8.50129
Racgap1	5	-3.0465	8.48162
Ran	5	-5.9701	8.47339
Hspa9	5	-3.4921	8.47031
Stx5a	5	-4.0825	8.46622
Top1	5	-2.9618	8.45296
Banf1	5	-4.4892	8.44561
Yars	5	-3.7499	8.43877
Pold2	5	-4.6497	8.43777
Tars	5	-3.978	8.4287
Psmc5	5	-3.6278	8.40469
Supt16	5	-4.5099	8.38983
Marchf4	5	-8.6113	8.38342
Gpx4	5	-3.6266	8.38096
Eef1e1	5	-3.7332	8.37899
Pfn1	5	-4.6376	8.37408
Setd8	5	-4.5359	8.3731
Pole2	5	-3.6277	8.36919
Xpo1	5	-3.4291	8.36723
Pop1	5	-3.414	8.35942
Mcm7	5	-3.8576	8.3468
Mybbp1a	5	-2.8723	8.34293
Wdr82	5	-3.6247	8.3381
Dis3	5	-3.426	8.33329
Pop5	5	-4.3969	8.33136
Pisd	5	-3.9106	8.31918
Skiv2l2	5	-2.7006	8.31603
Eif3f	5	-4.2454	8.31126
Marchf6	5	-8.4867	8.29702
Rac1	5	-4.6442	8.29229
Rpl21	5	-6.4619	8.28758
Uba1	5	-4.1128	8.2567
Septin8	5	-8.4404	8.25021
Eprs	5	-3.0747	8.24836
Atp2b1	5	-3.2048	8.24651
Ckap5	5	-2.8227	8.24558
Marchf9	5	-8.5535	8.23176
Chmp2a	5	-3.4776	8.22
Cdipt	5	-3.4839	8.2153
Csnk1a1	5	-3.2458	8.21439
Polr2g	5	-4.1989	8.20893
Ddb1	5	-3.5835	8.20438
Rpl13a	4	-7.0798	8.17589
Rbbp6	5	-2.8498	8.1693
Wars	5	-3.9033	8.15773
Rpsa	5	-6.0173	8.14934
Nubp2	5	-2.7344	8.14446
Anapc1	5	-3.4146	8.14005
Aurkb	5	-3.7393	8.13566
Usp7	5	-3.8323	8.1339
Ppil2	5	-3.3816	8.12864
Rad9a	5	-4.5236	8.11032
Mcm6	5	-2.7696	8.10685
Pole	5	-2.8313	8.10339
Pi4ka	5	-2.9548	8.10166
Psmb7	5	-5.7056	8.08786
Marchf11	5	-8.5284	8.06776
Psmb5	5	-6.3368	8.06776
Psmc2	5	-3.4395	8.06393
Abcf1	5	-3.066	8.05629
Septin10	5	-8.2694	8.04868
Copa	5	-4.2508	8.04699
Mettl16	5	-3.2208	8.04531
Gm25212	5	-7.5152	8.03942
Ddx23	5	-3.9777	8.0327
Wbscr22	5	-2.63	8.03187
Bard1	5	-3.262	8.02434
Rabggtb	5	-4.5088	8.01019
Marchf8	5	-8.2427	7.99533
Sec22b	5	-2.4186	7.99204
Ddx47	5	-2.8425	7.98957
Ubr4	5	-2.1845	7.97155
Cdk9	5	-3.8023	7.96993
Cse1l	5	-3.8721	7.94245
Marchf10	5	-8.4736	7.9272
Septin3	5	-8.4571	7.9272
Pop4	5	-3.0387	7.91289
Sae1	5	-2.1772	7.9113
Taf1a	5	-2.7027	7.9034
Slc39a7	5	-3.5317	7.89788
Eif4a1	5	-4.7441	7.89709
Cdc20	5	-4.9513	7.88532
Rpp40	5	-3.5437	7.86195
Metap1	5	-2.6942	7.85808
Gtf2h2	5	-3.1672	7.84652
Thg1l	5	-3.4002	7.83654
Dbr1	5	-3.1133	7.81446
Nup160	5	-2.8285	7.79784
Psmb6	5	-3.655	7.79409
Septin4	5	-8.4471	7.79073
Psmd14	5	-3.4404	7.78286
Psma1	5	-3.7587	7.78136
Npm1	5	-3.8718	7.77466
Gtpbp4	5	-4.51	7.77278
Txn1	5	-2.7752	7.77168
Sf3b3	5	-4.5336	7.7613
Spata5l1	5	-2.6751	7.72755
Ddx1	5	-2.1432	7.71231
Ddx3x	5	-4.5926	7.70726
Nudt21	5	-2.6149	7.70294
Iars	5	-3.8664	7.6936
Nup205	5	-4.3995	7.68645
Wdr5	5	-2.6124	7.68217
Gpkow	5	-2.5611	7.67931
Ttk	5	-4.046	7.67434
Rnmt	5	-2.5073	7.67079
Metap2	5	-3.3347	7.6482
Nars	5	-4.6148	7.6426
Cul3	5	-2.2135	7.6384
Ak6	5	-2.1188	7.63631
Ppwd1	5	-2.616	7.63352
Usp37	5	-3.4258	7.62586
Eif4g1	5	-2.8845	7.62238
Farsb	5	-3.2687	7.61963
Mtor	5	-2.9185	7.61477
Dhx9	5	-2.2596	7.59893
Zfp131	5	-2.7489	7.5914
Mastl	5	-3.7803	7.58117
Pmpcb	5	-3.896	7.57505
Rpl35a	5	-8.5252	7.56489
Rpl35	4	-6.0896	7.55838
Trrap	5	-2.6904	7.55343
Tsen34	5	-2.3329	7.55007
Mob4	5	-2.8555	7.54673
Timm50	5	-2.2828	7.54271
Kat8	5	-3.2194	7.53337
Psmd12	5	-4.4872	7.5327
Rpl4	5	-6.0639	7.53005
Keap1	5	-2.1281	7.51547
Kars	5	-4.147	7.51336
Rpp30	5	-2.3334	7.51086
Tubb5	5	-5.1283	7.49705
Osbp	5	-2.478	7.48011
Strip1	5	-2.4335	7.47816
Dtymk	5	-4.0215	7.47167
Vmp1	5	-5.1217	7.47038
Nvl	5	-2.1748	7.46974
U2af1	5	-3.4101	7.46263
Psmd4	5	-3.5888	7.46006
Cltc	5	-2.1711	7.44914
Rpl34	4	-3.3703	7.44873
Psma2	5	-4.2976	7.43128
Nckap1	5	-1.9107	7.42051
Ints1	5	-2.248	7.40665
Rrp12	5	-2.4703	7.40602
Anapc11	5	-3.307	7.40163
Pold3	5	-2.3045	7.38478
Rpap2	5	-1.6685	7.36806
Telo2	5	-2.4596	7.36682
Dimt1	5	-2.3293	7.34717
Ufd1l	5	-5.3113	7.34412
Rngtt	5	-2.6381	7.33925
Rars	5	-2.5891	7.30962
Vps25	5	-3.7395	7.30096
Trmt61a	5	-3.4359	7.29766
Polr1c	5	-3.76	7.29406
Sepsecs	5	-2.3783	7.26915
Snrnp25	5	-2.3379	7.26621
Xrn2	5	-3.0646	7.24512
Noc4l	5	-2.2081	7.24454
Tsen2	5	-1.9071	7.24163
Rbbp5	5	-2.0947	7.24046
Prpf19	5	-4.092	7.21328
Nedd8	5	-2.872	7.21099
Septin5	5	-7.7996	7.20354
Polr2i	5	-1.9769	7.19441
Alg2	5	-3.366	7.17965
Aasdhppt	5	-3.4385	7.17513
Riok2	5	-3.649	7.16106
Trappc1	5	-3.5474	7.15658
Sympk	5	-2.6733	7.14486
Mbtps2	5	-2.9382	7.14096
Snrnp70	5	-3.1106	7.13708
Polr3f	5	-3.2162	7.13652
Cct8	5	-3.2834	7.12933
Ercc2	5	-3.0486	7.08682
Pgk1	5	-2.4679	7.08393
Polr1d	5	-3.2896	7.07663
Septin14	5	-7.5296	7.07394
Cct4	5	-4.1923	7.06075
Cinp	5	-3.0785	7.05382
Gm23284	5	-7.4348	7.05222
Septin9	5	-7.8409	7.05115
Ddx54	5	-4.4313	7.04955
Polr3c	5	-2.1944	7.04476
Prc1	5	-4.203	7.04216
Nup107	5	-2.8195	7.04211
Septin15	5	-7.6331	7.03786
Polr2d	5	-2.0885	7.03522
Znrd1	5	-3.1591	7.03257
Psmc1	5	-2.7517	7.02887
Septin7	5	-8.2956	7.02176
Crk	5	-1.8477	7.00682
Cdk11b	5	-4.1318	6.99589
Copb2	5	-2.845	6.98188
Smc2	5	-2.5779	6.97794
Septin1	5	-7.9007	6.97416
Dut	5	-4.7463	6.96593
Wee1	5	-3.3624	6.96082
Vrk1	5	-1.9007	6.945
Tex10	5	-2.2582	6.93338
Eif2s2	5	-5.4202	6.9293
Pkmyt1	5	-1.7732	6.91578
Rpl7	5	-6.3924	6.91475
Rad1	5	-2.4931	6.91225
Uhrf1	5	-1.947	6.90326
Gnl3	5	-4.4752	6.89928
Ipo11	5	-2.0248	6.88938
Naa15	5	-2.9257	6.88326
Rps29	5	-5.2432	6.879
Cpsf3l	5	-2.9777	6.87458
Rpl28	5	-2.7838	6.86522
Nop56	5	-1.9622	6.85842
Ddx6	5	-2.6974	6.84479
Polr3a	5	-3.0727	6.83609
Dctn2	5	-2.3704	6.83271
Anapc5	5	-2.577	6.83174
Rbx1	5	-3.3472	6.82789
Pnn	5	-1.7982	6.80587
Wdr12	5	-2.2611	6.80159
Dync1h1	5	-3.061	6.79591
Cdk1	5	-4.2432	6.78125
Nat10	5	-2.9254	6.77637
Mars	5	-3.3869	6.77466
Wdr61	5	-1.9198	6.77374
Crcp	5	-3.4218	6.77091
Nfs1	5	-3.4376	6.76784
Nsf	5	-3.4588	6.76716
Hyou1	5	-1.8759	6.7611
Gnl3l	5	-2.5069	6.75736
Scap	5	-3.2886	6.74992
Traip	5	-1.9604	6.74946
Wnk1	5	-2.4074	6.74112
Cct7	5	-4.5892	6.72409
Polr1a	5	-3.8501	6.72115
Gapdh	5	-1.9868	6.71494
Hars	5	-5.2349	6.71083
Pmpca	5	-2.4022	6.71037
Atr	5	-3.3315	6.68997
Rpl38	5	-4.9648	6.68455
Rps15a	5	-3.9633	6.66884
Myh9	5	-2.424	6.66795
Atp6v1a	5	-3.9924	6.66617
Sys1	5	-2.7849	6.66571
Hdac3	5	-1.4023	6.66482
Rad51	5	-4.1409	6.66438
Cdc42	5	-2.7381	6.65459
Rpl10	5	-6.0429	6.64528
Septin6	5	-8.3961	6.64306
Tomm40	5	-3.5544	6.64218
Ipo7	5	-1.9545	6.61234
Ddx49	5	-4.419	6.60149
Rps3	5	-5.8237	6.58917
Ccnk	5	-1.7145	6.58163
Psmd2	5	-2.2249	6.57907
Tango6	5	-2.5969	6.5782
Cxxc1	5	-2.4891	6.57393
Fbl	5	-2.5376	6.57093
Csnk2b	5	-2.5848	6.56239
Dhps	5	-4.317	6.55857
Hspa8	5	-3.7934	6.55304
Prmt1	5	-2.3374	6.54821
Wdr1	5	-2.0714	6.545
Pdpk1	5	-2.6266	6.54291
Ppp1r2	5	-2.7133	6.54121
Supt5	5	-3.8628	6.53331
Deb1	5	-4.9867	6.53174
Rps13	5	-5.8568	6.53112
Gm22109	5	-6.9244	6.53069
Vprbp	5	-3.0322	6.52861
Rptor	5	-3.0496	6.52275
Hist1h4m	4	-2.444	6.52122
Pelp1	5	-2.3762	6.51482
Sart3	5	-3.1055	6.51357
Tceb2	5	-3.6388	6.50876
Ppp4c	5	-2.5812	6.5036
Rps14	5	-6.2232	6.49656
Ikbkap	5	-1.8056	6.48955
Taf3	5	-4.1562	6.47908
Naca	5	-2.1171	6.47887
Lsm6	5	-3.7262	6.47089
Rheb	5	-2.7522	6.47029
Rps15	5	-5.9794	6.46784
Ints2	5	-3.5367	6.44452
Scfd1	5	-3.3649	6.44151
Urm1	5	-2.5823	6.43748
Psmb2	5	-2.7304	6.43628
Skp1a	5	-2.3476	6.43267
Uso1	5	-2.9802	6.41708
Gm26504	5	-4.4443	6.4147
Vars	5	-3.8075	6.41064
Ptdss1	5	-1.6616	6.40873
Nup155	5	-2.3793	6.40835
Emg1	5	-3.2631	6.40795
Noc3l	5	-2.5964	6.40478
Mis18a	5	-4.2704	6.40399
Pelo	5	-2.3665	6.40319
Cdc73	5	-5.7833	6.38712
Eif2s1	5	-4.2018	6.38232
Rps9	5	-5.5407	6.37314
Polr1e	5	-3.9461	6.36104
Dhx33	5	-4.7265	6.35564
Gm3752	5	-4.2446	6.34426
Polr3d	5	-2.1069	6.33504
Cops4	5	-1.5851	6.33465
Dnmt1	5	-2.8631	6.32853
Eif2b4	5	-4.0581	6.32776
Fbxw11	5	-1.4975	6.32165
Copb1	5	-2.7328	6.31899
Phb	5	-1.8298	6.31823
Rpl39	5	-4.3357	6.30571
Grwd1	5	-3.7473	6.29982
Btbd35f18	5	-3.1962	6.28688
Tmem258	5	-2.3113	6.28613
Pnkp	5	-2.482	6.28508
Cdc16	5	-3.5698	6.28238
Ndc80	5	-3.305	6.28088
Ddost	5	-3.0409	6.27827
Xab2	5	-4.0778	6.27752
Gm14327	5	-3.4865	6.27715
Cct5	5	-4.6432	6.27304
Ercc3	5	-3.5751	6.2713
Rpn1	5	-2.6891	6.26486
Gm10487	5	-3.0171	6.25968
Clp1	5	-4.0058	6.25687
Lsm2	5	-4.0217	6.25228
Rnf40	5	-1.9216	6.2508
Cdc7	5	-2.4149	6.25043
Hmgb1	5	-3.6474	6.24069
Rpl24	5	-7.0793	6.23207
Riok1	5	-2.1698	6.22441
Iars2	5	-2.207	6.22113
Phf5a	5	-3.4768	6.21024
Actr2	5	-2.535	6.20482
Ilk	5	-1.7817	6.2041
Rps11	5	-4.7974	6.19869
Brf2	5	-3.2503	6.19797
Rpl36	5	-5.9058	6.19527
Gps1	5	-3.5128	6.18873
Trappc8	5	-4.4312	6.18649
Smg1	5	-2.9568	6.18398
Oxsm	5	-2.5512	6.17791
Ube2n	5	-1.7205	6.17043
Eif3i	5	-4.5358	6.16866
Cog1	5	-2.0328	6.16688
Ptk2	5	-1.5161	6.1552
Rps10	5	-4.9681	6.15308
Arcn1	5	-2.5668	6.15097
Pdcd11	5	-3.5743	6.14043
Rbbp4	5	-1.4296	6.13448
Naa20	5	-2.1361	6.12819
Rangap1	5	-3.0089	6.12784
Nop2	5	-4.1788	6.12645
Chaf1a	5	-3.3777	6.12262
Mdm4	5	-1.4079	6.12193
Ddx52	5	-3.0291	6.12151
Atp6v0e	5	-2.3528	6.12019
Tbcc	5	-4.1227	6.1188
Pik3r4	5	-1.6149	6.11568
Slc25a37	5	-1.9435	6.11533
Cdc37	5	-3.1461	6.11319
Rps7	5	-4.4887	6.11118
Rps3a1	5	-5.0598	6.10703
Snrpb	5	-3.9394	6.10221
Ddx18	5	-2.5557	6.1016
Snrpf	5	-4.9377	6.10117
Pop7	5	-4.0802	6.08744
Atp6v0b	5	-2.9221	6.08351
Gm14632	5	-3.2036	6.07789
Tubgcp6	5	-3.0361	6.07415
Utp18	5	-3.284	6.07278
Polr2j	5	-2.2479	6.06892
Prpf6	5	-4.548	6.06769
Rnaseh2a	5	-2.0704	6.05687
Anln	5	-3.8697	6.0535
Cops5	5	-1.5182	6.05249
Snf8	5	-2.1051	6.05047
Brf1	5	-5.2239	6.04846
Ash2l	5	-2.4413	6.04108
Rpl6	5	-6.1784	6.03139
Cars	5	-2.665	6.02892
Pggt1b	5	-2.5903	6.0095
Prpf38b	5	-3.329	6.00884
Rev3l	5	-2.9304	6.0062
Guk1	5	-3.142	6.00521
Psmd6	5	-5.3662	5.99503
Gspt1	5	-3.2887	5.99174
Top2a	5	-1.5731	5.9914
Snupn	5	-2.6989	5.99076
Dhx38	5	-3.4601	5.98945
Snrnp200	5	-2.8264	5.98619
Tsr2	5	-4.6123	5.98535
Dctn1	5	-2.0033	5.97803
Alg14	5	-2.5077	5.97741
Oxa1l	5	-2.5206	5.97708
Gm22291	5	-7.3336	5.97576
Exosc7	5	-3.6023	5.97445
Hypk	5	-2.0804	5.97318
Hus1	5	-2.1266	5.96928
Pmf1	5	-2.7887	5.96754
Actr3	5	-2.2201	5.95924
Rabggta	5	-2.1392	5.9557
Trmt112	5	-3.2166	5.95218
Rae1	5	-2.9478	5.9516
Ccl19	5	-1.4029	5.93968
Cul1	5	-1.7756	5.93648
Nup54	5	-1.4542	5.93584
Eif5b	5	-4.4591	5.9336
Eif4g2	5	-2.2178	5.91941
Rps17	5	-5.4066	5.91869
Snrpg	5	-3.7618	5.90354
Tsg101	5	-2.6697	5.90094
Rsl1d1	5	-3.5658	5.89949
Ints5	5	-1.3855	5.88446
Pafah1b1	5	-3.4956	5.87976
Rps28	5	-5.84	5.87854
Dna2	5	-3.6206	5.87514
Eif2b2	5	-4.1159	5.87481
Usp5	5	-2.6076	5.87234
Cdc27	5	-2.4766	5.86925
Ik	5	-2.0829	5.868
Pwp1	5	-1.8743	5.86337
Dpagt1	5	-2.18	5.85322
Ciao1	5	-2.6993	5.84888
Birc5	5	-5.1936	5.84734
Bysl	5	-4.805	5.83684
Atad5	5	-1.5301	5.83395
Ppp1ca	5	-1.3248	5.83212
Rrn3	5	-3.2706	5.82939
Kif23	5	-3.9428	5.82836
Naa25	5	-4.003	5.82786
Dnajc9	5	-3.9368	5.82725
Wdhd1	5	-3.9551	5.82606
Arih1	5	-1.5859	5.82452
Vps13d	5	-2.7832	5.82241
Usp8	5	-1.3353	5.81967
Snrpa1	5	-6.0429	5.81667
Atp6v1d	5	-2.7397	5.80443
Trmt5	5	-2.7007	5.80402
Atp5a1	5	-1.2152	5.79803
H3f3a	5	-2.672	5.79697
9930104L06Rik	5	-3.3496	5.79653
Zbtb7a	5	-1.4928	5.7837
Atp6v0c	4	-4.5159	5.7743
Bub3	5	-3.8908	5.7668
Tonsl	5	-2.9839	5.76475
Nop58	5	-4.2462	5.7612
Rnf20	5	-1.7409	5.75738
Rbm15	5	-2.0124	5.75736
Rad17	5	-2.3777	5.75562
Smn1	5	-2.1085	5.75004
Med28	5	-2.1974	5.74055
Arf4	5	-1.9955	5.73924
Wac	5	-2.3855	5.73691
Gtf3c1	5	-3.5014	5.72934
Vps35	5	-1.3017	5.72471
Ints3	5	-3.7306	5.72241
Sf3a3	5	-4.2484	5.72038
Utp6	5	-3.2914	5.71548
Vps52	5	-1.3356	5.71375
Snap23	5	-2.8994	5.71316
Tacc3	5	-1.9925	5.7103
Ppp6c	5	-3.0006	5.70712
Rpl12	5	-4.8298	5.70655
Eftud1	5	-1.78	5.70481
Tubg1	5	-3.1087	5.70415
Wdr46	5	-3.5945	5.70082
Eef1g	5	-2.746	5.69854
Crnkl1	5	-3.2844	5.69396
Hist1h4n	4	-1.6243	5.69244
Donson	5	-4.2333	5.69139
Brap	5	-1.4565	5.69054
Ptma	5	-1.5901	5.68854
Srp14	5	-3.7384	5.68827
Sf3b5	5	-4.5655	5.6877
Dync1i2	5	-3.7044	5.68514
Kin	5	-4.0768	5.68058
Eif3h	5	-1.7297	5.67975
Cdca8	5	-3.463	5.67917
Anapc2	5	-2.8866	5.67549
Psmb3	5	-2.7293	5.67109
Huwe1	5	-1.5422	5.66533
Nol6	5	-3.4292	5.66504
Tcp1	5	-3.9658	5.66364
Timm10	5	-4.0225	5.66336
Gm2000	4	-4.7194	5.66119
Cops6	5	-2.3101	5.65829
Atp5d	5	-1.7554	5.6541
Grpel1	5	-2.5088	5.65353
Nus1	5	-4.3513	5.65018
Nip7	5	-3.285	5.64096
Polr2h	5	-3.5922	5.6399
Rnps1	5	-2.7467	5.63958
Cmtr1	5	-2.2605	5.63863
Rps27a	5	-5.7056	5.63789
Ncapd2	5	-2.8522	5.63761
Rbm8a	5	-4.5447	5.63707
Ccdc84	5	-2.982	5.63373
Utp15	5	-3.6547	5.63179
Tomm22	5	-2.7557	5.62958
Diexf	5	-3.4362	5.62875
Anapc4	5	-1.4033	5.62847
Nuf2	5	-3.0698	5.62652
Utp23	5	-4.8486	5.62348
Etf1	5	-2.8428	5.61824
Txndc17	5	-2.9894	5.61658
Eif2b1	5	-3.7405	5.61218
Gfer	5	-3.4179	5.60864
Eif5	5	-3.909	5.60862
Rcc1	5	-2.8193	5.60725
Dhx15	5	-3.5341	5.60478
Glrx3	5	-1.9761	5.60286
Mcmbp	5	-3.4437	5.59972
Armc7	5	-2.8464	5.59685
Rps5	5	-3.2191	5.59577
Rps20	5	-5.093	5.59494
Gosr2	5	-2.764	5.5944
Ppie	5	-1.545	5.59113
Rpl13	5	-6.2187	5.59057
Cdt1	5	-2.6684	5.5884
Imp3	5	-2.9384	5.58705
Igbp1	5	-2.9724	5.5857
Mbtps1	5	-3.5886	5.58379
Rnasek	4	-3.4199	5.58221
Sp110	5	-2.1703	5.581
Tbca	5	-4.4907	5.57999
Polr3e	5	-3.6302	5.57973
Timeless	5	-2.6868	5.57674
Mrto4	5	-2.4422	5.56946
Gtf2f2	5	-1.5501	5.56785
Prpf31	5	-3.0901	5.5673
Ldha	5	-1.6647	5.56193
Gbf1	5	-2.3656	5.56166
Eif2b5	5	-4.2754	5.55335
Btf3	5	-2.7912	5.55281
Ppp4r2	5	-1.481	5.54987
Rpl14	5	-6.9695	5.54934
Gins2	5	-3.5379	5.54827
Ppa1	5	-2.3641	5.54241
Snip1	5	-3.3771	5.53841
Kif11	5	-3.8454	5.5341
Rtcb	5	-3.1728	5.53337
Rfc2	5	-2.5478	5.53232
Lsm7	5	-4.7691	5.52702
Sf3a2	5	-4.1491	5.52543
Rplp0	5	-3.4089	5.52491
Prmt5	5	-2.246	5.52307
Cdc45	5	-2.6079	5.52175
Terf2	5	-3.6931	5.51846
Sdad1	5	-4.117	5.51674
Mcm5	5	-3.664	5.51358
Gpr89	5	-1.538	5.5107
Nop16	5	-3.5618	5.5073
Wdr43	5	-3.6192	5.50232
Csk	5	-2.6228	5.50023
Gtf3c4	5	-2.3614	5.49854
Ptpmt1	5	-2.3002	5.49815
Cenpn	5	-2.4476	5.49606
Pkm	5	-1.8864	5.4932
Bud13	5	-2.6355	5.49216
Rpp21	5	-2.4728	5.4919
Wdr75	5	-3.0686	5.48852
Cycs	5	-2.1201	5.48845
Brca2	5	-2.4367	5.48154
Noc2l	5	-3.5482	5.47816
Rpl36a	5	-4.4245	5.47789
Amy2a5	5	-1.5605	5.47713
Ogdh	5	-1.0785	5.47634
Ppm1g	5	-1.1132	5.47532
Cog3	5	-1.5018	5.473
Wdr73	5	-2.8911	5.47274
Bop1	5	-3.5157	5.4699
Nasp	5	-1.5901	5.46939
Ipo13	5	-2.8757	5.45982
Nae1	5	-1.722	5.45963
Napa	5	-3.2147	5.45657
Ndufab1	5	-1.5955	5.4489
Oraov1	5	-3.3904	5.44851
Tsen54	5	-4.1451	5.44814
Polr3k	5	-2.1828	5.44455
Puf60	5	-3.6584	5.43543
Lonp1	5	-1.1363	5.43416
Ruvbl1	5	-2.9906	5.43366
Sumo2	5	-1.553	5.43239
Pes1	5	-3.9831	5.42797
Sf3b4	5	-4.8518	5.42507
Rps21	5	-3.9814	5.42054
Prelid1	5	-3.3585	5.42028
Vps29	5	-1.9527	5.41952
Lrr1	5	-3.7653	5.41001
Zfp830	5	-2.5791	5.40823
Ascc3	5	-1.9623	5.40773
Lsm5	5	-3.0138	5.40723
Nifk	5	-3.775	5.40523
Nubp1	5	-4.0378	5.40324
Eif4a3	5	-3.3678	5.40249
Rrp9	5	-2.8743	5.40074
Ccdc94	5	-2.1775	5.39874
Ddx21	5	-2.7508	5.39776
Psmd11	5	-2.7315	5.39576
Pdcd2	5	-1.9472	5.39572
Sec13	5	-2.3832	5.39527
Actl6a	5	-2.4276	5.39502
Ppp1r15b	5	-2.0269	5.39477
Rbm39	5	-3.0637	5.39402
Sf3b2	5	-4.4803	5.39253
Sf3b1	5	-3.8603	5.38905
Vps28	5	-3.0557	5.38286
Utp3	5	-2.3351	5.3815
Gemin8	5	-2.377	5.38076
Itgb1	5	-1.7999	5.37867
Nol11	5	-2.3588	5.37817
Gm11361	5	-3.9348	5.37792
Gtf3c5	5	-2.9692	5.37669
Wdr3	5	-2.935	5.37644
Taf11	5	-2.1092	5.37349
Adar	5	-2.2996	5.37226
Taf1d	5	-3.1117	5.37127
Strap	5	-1.5227	5.36955
Thoc2	5	-3.7671	5.3644
Pomp	5	-2.7683	5.36121
Rps26	5	-3.0681	5.36072
Mdn1	5	-3.7514	5.3568
Ccnh	5	-2.4989	5.3557
Usp9x	5	-1.1623	5.34559
Srsf1	5	-4.9149	5.34535
Gpn1	5	-2.3806	5.3434
Psmc3	5	-2.7752	5.34316
Psmd8	5	-1.8753	5.34027
Cct6a	5	-4.7597	5.34001
Chaf1b	5	-3.0651	5.33735
Mcm4	5	-2.8302	5.33299
Usp18	5	-1.4102	5.33009
Tnpo1	5	-1.6297	5.31662
Rpa1	5	-3.5984	5.31613
Lemd2	5	-1.0838	5.3123
Lage3	5	-2.8876	5.31206
Elp5	5	-2.4486	5.30824
Eif3g	5	-3.1324	5.30729
Kcmf1	5	-1.1125	5.30251
Ppp1r12a	5	-3.285	5.3012
Hscb	5	-2.615	5.30084
Toe1	5	-2.8129	5.2987
Gm6902	5	-1.8743	5.29775
Fcf1	5	-3.0781	5.29323
Ecd	5	-3.8161	5.29252
Cactin	5	-2.3351	5.29157
Vezt	5	-0.95429	5.29087
Heatr3	5	-1.8531	5.28897
Psmd3	5	-3.1135	5.28873
Mms19	5	-2.5496	5.28329
Tfdp1	5	-2.4348	5.28093
Cebpz	5	-2.626	5.27975
Haus5	5	-3.0289	5.27928
Impdh2	5	-0.95868	5.27763
Nup214	5	-1.3144	5.27551
Rictor	5	-1.3148	5.27151
Taf5	5	-3.0276	5.27058
Gins3	5	-3.0636	5.26682
Gm26391	4	-6.09	5.2612
Rps4x	5	-4.5709	5.25863
Dhx36	5	-1.2984	5.25769
Orc1	5	-3.5955	5.25536
Eif3b	5	-3.3736	5.25187
Atp6v1b2	5	-3.4577	5.24744
Rpl31	5	-4.2637	5.24698
Ccnb1	5	-3.5179	5.24675
Nup43	5	-2.4785	5.24397
Rpl7l1	5	-2.9814	5.23956
Naa50	5	-1.615	5.23897
Rtf1	5	-2.358	5.23875
Gm11554	5	-2.4563	5.23817
Nploc4	5	-1.7037	5.23794
Psmg3	5	-1.6754	5.23655
Dr1	5	-2.3341	5.23609
Gtf2h1	5	-3.5991	5.23494
Copg1	5	-3.0474	5.23332
Nmd3	5	-2.3314	5.22963
Incenp	5	-2.8358	5.22871
Dph1	5	-0.98228	5.22733
Eif2b3	5	-3.1153	5.22675
Rbm25	5	-2.5505	5.22089
Prpf38a	5	-3.5148	5.21974
Rps2	5	-3.4703	5.21928
Taf2	5	-2.1508	5.21688
Cnot3	5	-3.0625	5.21447
Efr3a	5	-2.4227	5.21196
Rbbp8	5	-1.8229	5.20374
Brd4	5	-1.9367	5.20192
Exosc6	5	-5.0009	5.19851
Ints9	5	-3.7838	5.19012
Ybx1	5	-1.773	5.18899
Las1l	5	-4.0474	5.17906
Lsg1	5	-3.1866	5.17726
Cenpw	5	-2.2914	5.17187
Rps25	5	-5.3717	5.17164
Pkn2	5	-1.2012	5.16716
Pfdn2	5	-3.5821	5.16559
Gltscr2	5	-2.2498	5.16537
Rft1	5	-2.5484	5.16492
Hspa14	5	-2.096	5.16113
Rpain	5	-2.4312	5.158
Dhdds	5	-3.4544	5.15711
Tiparp	5	-1.1837	5.15532
Tubgcp3	5	-3.6022	5.15243
Ccna2	5	-1.8356	5.15137
Nup88	5	-2.0425	5.14995
Gm13288	5	-1.861	5.14821
Dhx16	5	-2.4558	5.1471
Eif3a	5	-3.7387	5.14577
Cnot1	5	-3.0199	5.14156
Mre11a	5	-1.8383	5.14002
Atad3a	5	-1.7064	5.1378
Cnot11	5	-1.8944	5.13625
Snapc4	5	-2.8663	5.13184
Pgam1	5	-1.5825	5.13156
Taf10	5	-2.0538	5.13015
Ppp2ca	5	-1.9489	5.12987
Gtf2h4	5	-2.4113	5.12832
Fdxr	5	-1.7995	5.12744
Tbp	5	-2.5775	5.12272
Heatr1	5	-2.6758	5.12272
Nrf1	5	-1.983	5.12221
Ttc27	5	-3.0781	5.11954
Terf1	5	-1.9259	5.11845
Thap11	5	-2.9378	5.11823
Dclre1b	5	-1.5711	5.11517
Gtf3c2	5	-2.3556	5.11385
Ube2i	5	-3.1016	5.11146
Uba2	5	-3.5109	5.1107
Spata5	5	-1.8601	5.10818
Gm3893	5	-2.7	5.10578
Cenpl	5	-1.9874	5.10437
Drosha	5	-1.9152	5.10365
Eif1ad	5	-3.7725	5.10296
Fam32a	5	-1.7667	5.09277
Prpf4b	5	-1.7831	5.09147
Eif3m	5	-2.4728	5.08931
Rpa3	5	-4.6899	5.08693
Elac2	5	-2.0855	5.08606
1810026J23Rik	5	-2.9905	5.08542
Tmx2	5	-1.4771	5.0852
Eif3c	5	-3.7122	5.0809
2410131K14Rik	5	-1.5807	5.0766
Smc3	5	-3.6136	5.07595
Nudcd3	5	-2.152	5.07574
Mcm2	5	-2.5151	5.0751
Egln1	5	-1.404	5.07231
Ttf1	5	-3.5375	5.06631
Lamtor2	5	-1.7613	5.06449
Zfp207	5	-3.1693	5.06247
Ppil4	5	-1.3574	5.05906
Recql4	5	-1.8302	5.0548
Haus3	5	-2.1392	5.05342
Trnt1	5	-2.3305	5.0531
Pik3c3	5	-2.6601	5.05267
Gar1	5	-3.0526	5.0496
Cpsf2	5	-2.8759	5.04758
Topbp1	5	-2.6632	5.04673
Mcm3	5	-2.5316	5.04631
Rrp1	5	-4.6602	5.04271
Atp5l	5	-0.97356	5.04081
Tubgcp2	5	-2.7191	5.03807
Eif3d	5	-3.9163	5.03617
Ap2m1	5	-1.3952	5.03364
Rpl7a	5	-5.376	5.03175
Nom1	5	-3.5988	5.02775
Ggps1	5	-3.29	5.02502
Rpl29	5	-3.8728	5.02293
Scd2	5	-1.6607	5.02036
Chordc1	5	-2.0948	5.02
Cog8	5	-1.4014	5.01958
Rcl1	5	-2.9352	5.0177
Nhp2	5	-2.5169	5.01018
Rpl27	5	-3.3266	5.00748
Rnf168	5	-0.84359	5.00103
Ndnl2	5	-1.971	5.00083
Znhit2	5	-3.0126	4.99835
Map2k1	5	-2.1921	4.99766
Rfc3	5	-2.4809	4.99688
Nufip1	5	-2.2953	4.9965
Ahctf1	5	-1.7659	4.99585
Tbl3	5	-2.4662	4.99264
Fnta	5	-3.2118	4.98472
Zcchc9	5	-2.6896	4.98205
Atp7a	5	-1.201	4.98163
H2afx	5	-1.8291	4.97732
Gnl2	5	-3.2777	4.97159
Rrp7a	5	-3.4613	4.97139
Slc7a6os	5	-0.90515	4.97118
Psmc6	5	-2.2601	4.97013
Mad2l1	5	-1.4726	4.96972
Rfc4	5	-3.0198	4.96791
Ticrr	5	-3.0055	4.96301
Sin3a	5	-2.3029	4.96245
Tti2	5	-3.53	4.95892
Zbtb8os	5	-2.3458	4.95284
Brca1	5	-2.364	4.9523
Slc25a3	5	-1.1118	4.9502
Ranbp2	5	-1.0392	4.94677
Mocs3	5	-1.7066	4.94638
Dcaf13	5	-0.88749	4.9429
Uxt	5	-2.8432	4.94047
Fancd2	5	-0.85282	4.94029
Ilf2	5	-1.671	4.93828
Snw1	5	-2.363	4.93364
Narfl	5	-3.8492	4.93163
Cstf3	5	-2.0882	4.92863
Zmat2	5	-2.8114	4.92581
Sbno1	5	-2.5586	4.92482
Ubtf	5	-2.733	4.9246
Fdx1l	5	-1.5433	4.92281
Srsf7	5	-2.4697	4.92201
Pxn	5	-0.92691	4.9202
Rad51d	5	-1.4051	4.918
Hist2h3c1	4	-2.2357	4.91571
Srcap	5	-2.1279	4.91542
Gm3139	5	-2.0894	4.91382
Elmo2	5	-1.3816	4.91314
Prkrir	5	-2.7275	4.91165
Exosc8	5	-2.2747	4.91084
Nkap	5	-2.5864	4.91062
Dad1	5	-1.9138	4.91045
Tufm	5	-1.1133	4.90964
Dph5	5	-1.3045	4.90886
Spc24	5	-1.7888	4.90826
Nipbl	5	-3.631	4.90724
Bccip	5	-2.3597	4.90588
Nup62	5	-1.8164	4.90528
Arpc3	5	-1.8118	4.89337
Snapc3	5	-2.1532	4.89181
Abt1	5	-4.0071	4.89123
Hspe1	5	-4.0778	4.88965
Trmt6	5	-1.9749	4.88817
Cul2	5	-1.5734	4.8875
Wdr18	5	-2.1398	4.88472
Rnaseh2c	5	-2.3404	4.88187
Rpn2	5	-2.2364	4.8814
Sec61a1	5	-3.315	4.88081
Snapc2	5	-2.5137	4.87962
Gm10139	5	-2.9207	4.87805
Exosc4	5	-5.254	4.87677
Rps19	5	-2.5311	4.87677
Prim2	5	-1.907	4.87335
Nop14	5	-1.9925	4.87257
Dmap1	5	-2.2117	4.87102
Sf3a1	5	-3.5258	4.86944
Copz1	5	-2.1936	4.86886
Trappc5	5	-2.118	4.86477
Sacm1l	5	-1.8918	4.86322
Atp5b	5	-1.5729	4.86062
Hist1h2bq	5	-3.5696	4.85912
Uba3	5	-1.5907	4.85836
Arpc4	5	-2.4332	4.85824
Oip5	5	-3.8153	4.85164
Paf1	5	-1.1226	4.85137
Gpn2	5	-2.2443	4.8502
Upf2	5	-2.3189	4.8479
Dhx37	5	-3.71	4.8471
Romo1	5	-1.5525	4.84479
Snrpd3	5	-5.9735	4.84266
Atf4	5	-1.3632	4.84037
Zbtb11	5	-2.9964	4.83186
Smarca5	5	-1.6297	4.8293
Rnf8	5	-1.6367	4.82443
Abcb7	5	-2.1413	4.82105
Btbd35f15	4	-3.1997	4.81727
Rad21	5	-3.126	4.81364
Gemin5	5	-3.3425	4.81223
Skp2	5	-0.74728	4.80936
Dda1	5	-1.354	4.8088
Med18	5	-1.3794	4.80785
Dolk	5	-1.5666	4.80729
Rnpc3	5	-3.5378	4.8069
Bptf	5	-1.4926	4.80635
Ctdp1	5	-2.3222	4.80576
Ccdc86	5	-1.5423	4.80424
Ctu2	5	-1.3774	4.80407
Rnu6	5	-6.1573	4.80046
Ddx51	5	-3.8656	4.79896
Adat2	5	-1.5689	4.79762
Ddx46	5	-2.7395	4.79689
Ddx10	5	-2.7554	4.79207
Nob1	5	-1.7196	4.79102
Supt6	5	-2.9379	4.79027
Sf1	5	-3.6906	4.7899
Ppp6r3	5	-0.95696	4.78747
Ddx20	5	-2.9341	4.78651
Sf3b6	5	-2.397	4.7837
Tubgcp4	5	-2.1598	4.77752
Ebna1bp2	5	-1.7643	4.77676
Nsmce1	5	-1.3815	4.7763
Tpr	5	-0.93162	4.77526
Tsr1	5	-3.0803	4.77173
Adrm1	5	-1.3213	4.77042
Tbcb	5	-2.9336	4.76968
Cdc5l	5	-4.1955	4.76835
Prkar1a	5	-0.95383	4.75963
Preb	5	-2.5725	4.75609
Ap2s1	5	-2.4376	4.75134
Rb1cc1	5	-0.84036	4.75129
Mcm10	5	-1.5228	4.75056
Xrcc3	5	-2.7556	4.74851
Gnb1l	5	-2.8339	4.74299
Eif1	5	-3.833	4.7428
Taf1b	5	-2.9421	4.74096
Mnat1	5	-2.9656	4.74007
Gtf2b	5	-4.0352	4.73617
Rbm19	5	-2.5661	4.73398
Tln1	5	-1.5506	4.73234
Ept1	5	-0.98529	4.72721
Pin4	5	-1.3089	4.72702
Ppia	5	-2.5832	4.72111
Aatf	5	-1.8599	4.72063
Phf12	5	-1.268	4.72008
Samm50	5	-1.5654	4.71772
Yars2	5	-0.8261	4.71352
Hnrnpl	5	-2.499	4.71298
Leng8	5	-1.8776	4.71244
Gtf2e2	5	-1.7812	4.71153
Atp6v0d1	5	-3.1469	4.7109
Srbd1	5	-2.1784	4.71043
Rplp1	5	-3.309	4.70808
Ogt	5	-2.7192	4.70591
Rpp14	5	-2.0641	4.70505
Cog4	5	-1.1198	4.70474
Ddx11	5	-1.934	4.69255
Rpph1	5	-1.6754	4.68986
Prim1	5	-2.0398	4.6859
Wdr48	5	-0.77735	4.68376
Nrbp1	5	-2.1267	4.6816
Cops2	5	-1.7505	4.68075
Hinfp	5	-3.7104	4.67963
Krtap28-13	5	-3.8444	4.6749
Lsm4	5	-4.0467	4.67231
Tnpo3	5	-1.7196	4.67107
Kansl2	5	-3.3248	4.66981
Mark2	5	-1.1088	4.66716
Pdrg1	5	-1.9456	4.66643
Psmd7	5	-2.6712	4.6627
Ccnd1	5	-2.6823	4.66069
Orc4	5	-1.4986	4.65561
Snapc5	5	-3.3061	4.65437
Picalm	5	-1.2155	4.65066
Gemin2	5	-2.454	4.64784
Pwp2	5	-3.2388	4.6466
Wdr36	5	-2.6454	4.64344
Ep400	5	-1.6973	4.64264
Arl2	5	-2.5998	4.63975
Nsmce4a	5	-2.3948	4.63941
Haus1	5	-2.6033	4.63537
Rps6	4	-4.6795	4.63459
Tgs1	5	-2.0089	4.63309
Pcid2	5	-1.8988	4.63274
Dnajc2	5	-1.3197	4.63064
U2af2	5	-3.3939	4.62836
Map3k2	5	-1.0815	4.62801
Pak1ip1	5	-2.6764	4.62556
Gm13279	5	-1.9953	4.62226
Sprtn	5	-1.6524	4.62059
Alg11	5	-2.9031	4.61964
Tceb1	5	-1.7059	4.61878
Sars	5	-2.8521	4.61669
Esco2	5	-1.9466	4.61234
Gtf2a2	5	-3.6725	4.61149
Sfi1	5	-4.0497	4.60922
Gpatch1	5	-1.771	4.60595
Osgep	5	-3.6971	4.60457
Cwc15	5	-1.7657	4.60422
Hspd1	5	-1.9109	4.60192
Dgcr8	5	-1.6035	4.59679
Cenpi	5	-1.9521	4.59559
Ythdc1	5	-3.3528	4.59457
Isg20l2	5	-3.7664	4.59232
Ice1	5	-1.6199	4.59198
Ftsj3	5	-2.5292	4.5901
Gmppb	5	-0.81968	4.58717
Orc2	5	-3.0213	4.58494
Phax	5	-1.5226	4.58008
D19Bwg1357e	5	-2.2806	4.57692
Gm13698	5	-1.3748	4.57316
Atp6v1f	5	-1.8902	4.5718
Jtb	5	-1.5307	4.5712
Adat3	5	-1.3877	4.56909
Wdr74	5	-4.914	4.56451
Psmd13	5	-2.8914	4.56424
AU019823	5	-1.3613	4.56347
Gm16367	5	-1.5167	4.56263
Med14	5	-2.9728	4.56043
Fam96b	5	-3.415	4.55857
Dnttip2	5	-2.3729	4.55772
Rfc1	5	-2.461	4.55283
Crkl	5	-0.8377	4.55249
Slmo2	5	-3.5617	4.55077
Rhoa	5	-0.70461	4.5486
Gm10053	5	-0.86958	4.54659
Utp11l	5	-1.4125	4.54577
Wdr26	5	-0.72523	4.54558
Tuba1b	3	-3.0096	4.54543
Srsf2	5	-5.67	4.54277
Hsp90ab1	5	-1.4821	4.53879
Pcyt1a	5	-3.3219	4.5378
Nol10	5	-3.0829	4.53484
Bub1b	5	-1.4667	4.53468
Gm25018	5	-3.4714	4.53316
Pam16	5	-2.1781	4.53049
Sart1	5	-1.9887	4.52966
Nsl1	5	-4.0867	4.52932
Wdr4	5	-1.5154	4.52865
Atp5h	5	-1.1607	4.52599
Cpsf6	5	-1.9952	4.52166
Erh	5	-2.7093	4.51999
Elp4	5	-1.293	4.51701
Gm21083	5	-2.6942	4.51651
Mcat	5	-0.77539	4.51567
Gemin6	5	-1.7874	4.5107
Cirh1a	5	-2.4408	4.51004
Ube2c	5	-0.94128	4.50987
Fxn	5	-3.1025	4.50272
Unc45a	5	-1.5344	4.49849
Smndc1	5	-1.8105	4.49734
Rpl18a	5	-5.1053	4.49077
Tbce	5	-0.91635	4.48652
Taf8	5	-2.9522	4.48406
Cenpe	5	-1.8262	4.48291
Ccl21c	5	-2.1131	4.47606
Icmt	5	-0.87751	4.47362
Tardbp	5	-2.5362	4.47298
Sugt1	5	-2.0695	4.47281
Tpt1	5	-2.4895	4.45832
Asna1	5	-1.8561	4.45757
Ddx39b	5	-1.453	4.45515
Timm22	5	-1.8964	4.45168
Ube2m	5	-1.4577	4.44939
Pgs1	5	-1.2715	4.44871
Atp5f1	5	-1.188	4.44855
Ccdc12	5	-2.0999	4.44678
Med21	5	-2.0082	4.44229
Mphosph10	5	-2.356	4.43764
Lamtor1	5	-1.5022	4.4366
Ncaph2	5	-2.6406	4.43405
Smc6	5	-2.1087	4.43189
Rnf4	5	-0.67038	4.42934
Snrpe	5	-4.0497	4.4287
Dusp12	5	-1.0421	4.42647
Srfbp1	5	-2.2619	4.4263
Ddx27	5	-2.5797	4.42297
Polr2k	5	-1.5472	4.41567
Stard10	5	-0.99213	4.41519
Akirin2	5	-2.67	4.41488
Ubap1	5	-1.1858	4.41124
Vps72	5	-1.6502	4.40776
Sptlc2	5	-0.85368	4.40571
Zw10	5	-1.2507	4.40477
Slu7	5	-3.075	4.40256
Urb1	5	-3.023	4.40098
Ncbp2	5	-3.0497	4.40019
Xpo5	5	-1.422	4.39769
Ddx59	5	-1.9543	4.39736
Golt1b	5	-3.0563	4.39648
Dbf4	5	-2.3839	4.39596
Chd8	5	-2.4151	4.39009
Cdc6	5	-3.9869	4.38281
Prpf3	5	-3.2777	4.38221
Rps6-ps4	4	-3.0371	4.38067
Eif6	5	-4.0121	4.37648
Emc3	5	-1.1707	4.37565
Pcf11	5	-2.7422	4.37539
Gon4l	5	-1.2544	4.37525
Orc5	4	-4.7119	4.37469
Ttc4	5	-1.1349	4.37253
Arglu1	5	-2.5444	4.37222
Gm49450	4	-4.0144	4.36652
Cenpk	5	-1.4345	4.36494
Isy1	5	-2.9366	4.35845
Drg2	5	-0.59358	4.35798
Emc8	5	-1.1633	4.35698
Aqr	5	-1.9949	4.35398
Kif20a	5	-2.6243	4.35228
Arl1	5	-1.9265	4.35151
Hsp90b1	5	-0.84561	4.35029
Psmc4	5	-3.9769	4.34614
Gpn3	5	-1.9224	4.34506
Hmces	5	-0.79463	4.34415
Rps23	2	-6.0541	4.33828
Anapc10	5	-2.0851	4.33541
E4f1	5	-2.2529	4.33438
Rrs1	5	-3.1633	4.33207
Arhgef7	5	-1.2214	4.33161
Imp4	5	-1.8974	4.3275
Arpc2	5	-0.74579	4.3269
Kpna2	5	-1.4546	4.32218
Atp1b3	5	-0.73647	4.32127
Cwc22	5	-3.5626	4.31903
Clspn	5	-1.3891	4.3134
Ilf3	5	-1.5984	4.31265
Aifm1	5	-1.3485	4.31038
Cdc26	5	-1.842	4.30895
Vps4b	5	-1.2368	4.30586
Ppp2r4	5	-2.3224	4.30367
Srp72	5	-1.1312	4.30194
Chd4	5	-1.2816	4.3005
Gm11239	5	-1.3197	4.30029
Chtf8	5	-1.2564	4.29835
Ykt6	5	-2.2771	4.29734
Aurkc	5	-1.8074	4.29447
Nelfcd	5	-1.5113	4.29369
E2f3	5	-1.118	4.2913
Rbm42	5	-1.8616	4.28637
Spcs2	5	-1.516	4.28446
Rpp38	5	-2.6843	4.2798
Wdr77	5	-2.3969	4.27817
Dcps	5	-0.76371	4.27758
Atp5e	5	-1.8378	4.27705
Mau2	5	-2.1449	4.27127
Nup153	5	-1.162	4.26542
Srp68	5	-1.8915	4.26158
Gle1	5	-4.0298	4.26122
Ciapin1	5	-2.2066	4.25981
Trappc3	5	-3.4413	4.25701
Rbmx2	5	-1.5169	4.25658
Rps16	5	-3.8388	4.25584
Mgat2	5	-0.69025	4.25128
Mlst8	5	-1.3392	4.25
Orc3	5	-4.615	4.24937
Timm23	5	-2.9598	4.24893
Zc3h18	5	-1.0699	4.24776
Ttc1	5	-1.7461	4.24673
Mak16	5	-3.0691	4.24571
D2Wsu81e	5	-2.8781	4.24468
Cers2	5	-0.64165	4.24073
Cdk2	5	-0.85207	4.24029
Exosc5	5	-2.6419	4.23767
Ndufa1	5	-1.2	4.23504
Uqcrq	5	-0.8099	4.23329
Ddx5	5	-1.0892	4.23241
Med20	4	-2.2178	4.22947
Fam98b	5	-1.2622	4.22849
Mapkap1	5	-0.74241	4.22588
Zfc3h1	5	-1.5407	4.22239
Gm13275	5	-1.6479	4.22167
Gm904	5	-1.2388	4.21162
Rbm48	5	-1.8005	4.21141
Tcof1	5	-1.4428	4.2091
Sec61g	5	-2.6301	4.1926
Tubgcp5	5	-1.8016	4.19045
Atp6v1e1	5	-1.9536	4.18803
Rraga	5	-1.6494	4.18798
Aamp	5	-2.983	4.18422
Kansl3	5	-1.9262	4.17835
Eaf1	5	-3.1106	4.17821
Nrde2	5	-1.3284	4.17722
Gm7609	5	-3.4605	4.17429
Psmg4	5	-4.1595	4.17403
Seh1l	5	-1.4884	4.1727
Thoc1	5	-1.5087	4.17112
Gcn1l1	5	-1.5397	4.17055
Cmip	5	-2.139	4.17013
Ints4	5	-3.0287	4.17003
Ugt1a1	5	-1.5239	4.16885
Mars2	5	-0.88439	4.16829
Med17	5	-2.6325	4.16674
Pias1	5	-0.60853	4.16617
Timm44	5	-1.4715	4.16349
Wdr59	5	-1.3411	4.16278
Nsa2	5	-2.0074	4.16236
Yeats2	5	-1.2138	4.1618
Gtf2e1	5	-1.2205	4.16099
Tomm20	5	-1.5542	4.15757
Kif18b	5	-3.017	4.1541
Gm13697	5	-1.636	4.15168
Gm10413	4	-4.6312	4.14992
Slc38a2	5	-0.7891	4.14411
Lias	5	-1.096	4.14132
Ndufs1	5	-0.6474	4.14104
Plrg1	5	-2.2479	4.13909
Rpl9-ps6	5	-1.6036	4.13699
Fkbpl	5	-1.2487	4.13282
Dctn6	5	-2.7753	4.1324
Utp20	5	-2.251	4.13171
Polrmt	5	-0.80669	4.12616
Dock7	5	-1.3529	4.12532
Ints6	5	-1.0102	4.12477
Gm13696	5	-1.2504	4.12352
Hnrnpc	5	-1.631	4.12311
Trappc11	5	-1.6348	4.12255
Thoc5	5	-2.8815	4.11598
Eif3k	5	-0.88048	4.11068
Nutf2	5	-2.5029	4.11013
Gm7978	5	-3.1968	4.10928
Cenph	5	-0.99373	4.1023
Prpf40a	5	-2.5171	4.10175
Eif4e2	5	-0.66814	4.09915
Hist2h2aa2	5	-1.4438	4.09778
Rps12	5	-6.2338	4.09614
Emc6	5	-0.95722	4.09477
Exosc2	5	-4.0867	4.09251
Thoc3	5	-2.509	4.09136
Nolc1	5	-2.0327	4.08271
Gak	5	-1.6891	4.0825
Mtbp	5	-0.85907	4.07979
Chchd4	5	-1.7078	4.07823
Mettl1	5	-1.0159	4.07789
Parg	5	-2.0637	4.07694
Hist2h2aa1	5	-1.6048	4.07369
Bms1	5	-4.2088	4.06987
Mrpl44	5	-0.57073	4.06572
Gtf2a1	5	-1.3972	4.06464
Mrpl36	5	-0.86901	4.06316
Haus4	5	-2.8624	4.0631
Fen1	5	-1.2312	4.0626
Cox7c	4	-1.4261	4.06231
Rtfdc1	5	-2.3847	4.0616
Rpl36al	5	-1.7877	4.06007
Ndufb9	5	-0.92141	4.05913
Pi4kb	5	-2.0915	4.05768
Gm10123	5	-2.2056	4.05536
Rps24	5	-4.0607	4.05349
Ctr9	5	-2.5641	4.04666
Atp5k	5	-1.112	4.04394
Pyroxd1	5	-1.6902	4.04295
Vim	5	-0.4889	4.04079
Psmg1	5	-2.4946	4.03732
Npat	5	-1.2933	4.03453
Ppp1r7	5	-1.2407	4.03431
Tpx2	5	-2.7675	4.0331
Dhx8	5	-3.39	4.03284
Sfswap	5	-2.2611	4.03075
Yap1	5	-1.0269	4.0267
Trappc4	5	-2.2887	4.02498
Fcho2	5	-1.2105	4.02088
Adsl	5	-0.68419	4.02036
C130026I21Rik	5	-2.0545	4.01824
Xrcc6	5	-0.54906	4.01785
Taf9	5	-0.79356	4.01627
Srf	5	-0.59586	4.01521
Kansl1	5	-1.5138	4.01403
Fam50a	5	-1.672	4.01186
Med26	5	-1.7394	4.00208
Haus2	5	-2.0992	3.99542
Palb2	5	-1.9521	3.9943
Dnajc17	5	-2.4935	3.99281
Nelfb	5	-2.6126	3.99178
N6amt1	5	-0.95833	3.98733
Taf4a	5	-1.294	3.98422
Ube2d3	5	-2.3639	3.98197
Ddx19a	5	-3.3497	3.97724
Carm1	5	-0.91775	3.97551
Ptar1	5	-0.69547	3.97127
Rmrp	5	-2.5981	3.97049
Iscu	5	-2.9029	3.97033
Exosc9	5	-2.4247	3.96638
Mrpl49	5	-0.71789	3.96493
Setdb1	5	-0.58368	3.96329
Tbcd	5	-2.1555	3.95829
Gm14819	5	-4.2005	3.95805
Hmgb2	5	-1.6039	3.95739
Bnip1	5	-1.6157	3.95632
Son	5	-1.5309	3.95558
Egfr	5	-0.56251	3.9497
Smg5	5	-1.4001	3.94688
Rbm17	5	-1.5429	3.9342
D10Wsu102e	5	-1.5194	3.93375
Xrcc2	5	-1.3986	3.93338
Brd2	5	-1.2805	3.93263
Exosc3	5	-3.549	3.93148
Srebf1	5	-1.0582	3.92963
Stk11	5	-1.4452	3.92871
Rbmxl1	5	-1.1206	3.92694
Rnu73b	5	-0.90193	3.92249
C330027C09Rik	5	-1.4706	3.91948
Shq1	5	-1.3516	3.91357
Ctu1	5	-1.045	3.91215
Ppm1d	5	-1.3063	3.91154
Chmp3	5	-0.92574	3.91116
Atg9a	5	-1.5031	3.91041
Blm	5	-0.99665	3.90802
Cyb5r4	5	-0.81537	3.90752
Cenpo	5	-2.6498	3.90278
Gm2026	5	-1.9508	3.90004
Spag9	5	-0.61318	3.89626
Ngdn	5	-2.6819	3.8951
Cks1b	5	-1.0638	3.89303
Atp5j	5	-0.76673	3.89242
Wdr33	5	-2.5797	3.89235
Cnot8	5	-0.8874	3.89143
Ipo9	5	-1.456	3.891
Tti1	5	-2.0877	3.89008
Ric1	5	-1.8715	3.88897
Mrpl21	5	-0.7751	3.8885
Drap1	5	-3.0964	3.88309
Taf6	5	-2.4177	3.88107
H2-D1	5	-1.3598	3.87703
Wdr55	5	-4.3448	3.87661
Bod1l	5	-1.96	3.87426
Ptbp1	5	-0.9506	3.87384
Dgcr14	5	-1.2759	3.87322
H2al1d	5	-1.3505	3.87264
Ankrd11	5	-1.3931	3.87125
Smc4	5	-2.7886	3.8706
Gm13277	4	-1.5403	3.86091
Ctdspl2	5	-0.64078	3.8593
Gm14296	5	-1.5865	3.85733
Cdc123	5	-3.3869	3.85689
Lin54	5	-0.98728	3.85586
Snrpd1	5	-2.9742	3.85477
Bud31	5	-2.3934	3.85279
Rpl10a	5	-5.2709	3.84661
Uba6	5	-1.4662	3.84333
2810004N23Rik	5	-2.438	3.84113
Yae1d1	5	-2.2415	3.83929
Ddx24	5	-4.46	3.83914
Acaca	5	-1.1329	3.83651
Atp5c1	5	-1.5733	3.8352
Smc1a	5	-2.6907	3.83106
Nepro	5	-1.518	3.82475
Prpf18	5	-2.0746	3.82163
Ostc	5	-1.0673	3.82079
Nupl1	5	-1.4164	3.81588
Ube2l3	5	-1.1325	3.81434
Vps36	5	-1.155	3.8113
Dlst	5	-0.74963	3.8095
Cdk6	5	-0.76948	3.80852
Luc7l3	5	-1.9321	3.80601
Pfdn6	5	-2.6294	3.8041
Znhit3	5	-2.1778	3.80302
Med22	5	-2.3026	3.80195
Ewsr1	5	-1.1969	3.79504
Strn3	5	-0.58329	3.79336
Triap1	5	-3.5256	3.78864
Zpr1	5	-5.1283	3.78821
Zfp36l2	5	-1.3834	3.7872
Emc1	5	-1.3878	3.78336
Mcrs1	5	-2.4331	3.78165
Ncbp1	5	-2.3267	3.78162
Gm3020	4	-1.7694	3.77913
Caml	5	-0.84431	3.77749
Nop9	5	-3.1566	3.77736
Hcfc1	5	-3.323	3.77721
Eif3e	5	-2.7016	3.77549
Pdcd2l	5	-0.89333	3.77283
Eny2	5	-0.90653	3.77224
Leo1	5	-1.4171	3.7717
Htatsf1	5	-2.1397	3.76688
Gm10488	5	-3.4335	3.75998
Caprin1	5	-0.46334	3.75893
Vps18	5	-1.2583	3.75811
Gm13289	5	-2.0606	3.7535
Zbtb17	5	-1.3891	3.75183
Tma16	5	-2.4745	3.75097
Orc6	5	-2.1137	3.747
Lin52	5	-1.365	3.7463
Dohh	5	-2.1555	3.74478
Mgat1	5	-0.86888	3.74468
Akt1	5	-0.96867	3.74271
Hbs1l	5	-1.1274	3.74247
Gm13693	5	-3.0673	3.74002
Fntb	5	-2.1117	3.73909
Kif18a	5	-1.0423	3.73655
Lars	5	-1.9696	3.73177
Krr1	5	-2.5871	3.72767
Exoc4	5	-0.92324	3.72476
Msto1	5	-2.5098	3.72315
Ltv1	5	-2.2618	3.71935
Uqcrc2	5	-0.64703	3.71316
Trip13	5	-1.3656	3.71019
Srprb	5	-1.3675	3.70943
Ppp1r10	5	-1.0491	3.70812
Ino80	5	-2.2702	3.69717
Gtf2h3	5	-2.1017	3.68797
Gm20765	5	-0.87139	3.68672
Hgs	5	-1.5183	3.68277
Rpf1	5	-2.1956	3.67836
Amy2a4	5	-1.1036	3.67702
Cnot10	5	-1.8107	3.67144
Vps33a	5	-0.92769	3.67026
Phf23	5	-0.60317	3.66924
Zfp622	5	-2.6343	3.66797
Rad50	5	-0.91296	3.66647
Cbfb	5	-1.0306	3.66621
Foxk1	5	-0.53086	3.66386
Dynll1	5	-1.5947	3.65453
Flg	5	-0.64103	3.65191
Pik3ca	5	-0.87295	3.64422
Elp6	5	-2.3343	3.64174
Mrps21	5	-0.9683	3.63757
Srpr	5	-1.9156	3.63708
Pdcl	5	-0.92836	3.63315
Gm12070	3	-2.8674	3.63251
Sprr2a1	5	-1.4593	3.63028
Qrsl1	5	-0.53077	3.62621
Mad2l1bp	5	-1.4401	3.623
Duxf3	5	-2.343	3.62122
Vars2	5	-0.62086	3.6201
Defb41	3	-1.4182	3.61843
Clasrp	5	-1.3857	3.61697
Gm11236	5	-1.0527	3.6162
Trp53bp2	5	-0.51981	3.61575
Opa1	5	-0.82629	3.61347
Dnaja3	5	-1.5387	3.61169
Mybl2	5	-1.3872	3.60908
A530032D15Rik	5	-2.2736	3.60743
D8Ertd738e	5	-2.5816	3.60515
Dnm2	5	-1.0017	3.60242
Bcar1	5	-1.3695	3.60232
Gpi1	5	-0.57948	3.60199
Nop10	5	-2.1658	3.59907
Cog6	5	-0.70192	3.59829
Ctcf	5	-2.2197	3.59786
Ctage5	3	-1.1098	3.59721
Mis18bp1	5	-1.6719	3.59346
Sap30bp	5	-3.7652	3.59337
Mecr	5	-0.61418	3.58897
Sap18	5	-0.93282	3.58313
Lamtor4	5	-0.67578	3.57957
Rpa2	5	-3.746	3.5753
Timm13	5	-1.2003	3.57414
Rnu12	5	-1.4451	3.57414
Ing2	5	-0.51545	3.56463
Rpl41	5	-3.4429	3.563
Exosc1	5	-2.5939	3.56021
Rpap1	5	-0.90092	3.55972
Cyfip1	5	-1.2251	3.55558
Gm13285	3	-2.1142	3.55235
Spdl1	5	-1.6082	3.54412
Ska2	5	-1.9588	3.53572
1110037F02Rik	5	-1.6679	3.53371
Slx4	5	-0.55799	3.53233
Sumo1	5	-0.99423	3.53006
H2-Q7	5	-0.94572	3.52376
Gm10354	4	-1.2974	3.52217
Ppp1r11	5	-1.798	3.52197
Amy2a3	5	-0.68091	3.51998
Med6	5	-1.7354	3.5188
Rpe	5	-1.1829	3.51824
Gm4567	5	-1.8197	3.51302
Ccl19.2	5	-1.4819	3.51177
Emc7	5	-1.0691	3.50744
Exo1	5	-0.73174	3.50654
Ei24	5	-0.97191	3.5027
Xpr1	5	-0.97658	3.50071
Fars2	5	-0.7855	3.49864
Traf7	5	-0.98135	3.49014
Ptpn11	5	-0.48469	3.48941
Pus3	5	-0.93965	3.48704
Dsn1	5	-1.2307	3.48632
Mrpl27	5	-0.6443	3.4828
Cep192	5	-1.6589	3.48158
Gtf3a	5	-1.2712	3.4791
Ufsp2	5	-0.59788	3.47529
Snrnp27	5	-2.0261	3.47417
Rgp1	5	-0.8792	3.47294
Yrdc	5	-0.97013	3.47026
Ganab	5	-0.48702	3.47016
Rgs6	5	-0.73595	3.46906
Gon7	4	-2.0525	3.46627
Lig1	5	-0.63279	3.46136
Nol12	5	-2.6684	3.4596
Med11	5	-2.3622	3.45873
Dnm1l	5	-0.41008	3.45719
Adam11	5	-0.85576	3.45263
Ccdc59	5	-1.3342	3.45225
Mis12	5	-2.5249	3.44933
Psmg2	5	-2.3819	3.44569
Yeats4	5	-1.4098	3.44378
Rad51c	5	-1.554	3.44231
Klf16	5	-0.6653	3.43922
H2afz	5	-2.331	3.43852
Prcc	5	-0.65783	3.43629
Ndc1	5	-0.76857	3.43516
Pikfyve	5	-1.1973	3.43464
Nup98	5	-1.1381	3.43429
Pdgfra	5	-0.44535	3.43156
Birc6	5	-0.85929	3.43095
Tfrc	5	-0.49791	3.42834
Ube2h	5	-0.6775	3.42693
Tm2d3	5	-0.47297	3.42583
Cdan1	5	-1.5857	3.42493
Skiv2l	5	-0.95941	3.42312
Fam122a	5	-0.5144	3.42201
Rock2	5	-0.45567	3.42091
Rint1	5	-0.80598	3.41821
Snrnp48	5	-1.4049	3.41631
Srrt	5	-2.3216	3.41514
Rpl30	3	-4.4571	3.4115
Gm21293	5	-0.6271	3.41072
Egln3	5	-0.6113	3.40933
Ncapd3	5	-2.3276	3.40801
Gosr1	5	-1.0815	3.40615
Rab18	5	-0.7056	3.40544
Cd2bp2	5	-0.98037	3.40305
Ranbp1	5	-0.62104	3.40206
Dars2	5	-0.41749	3.40176
Ctnnbl1	5	-1.6617	3.40125
Lsm3	5	-1.6407	3.39898
Rps18	5	-4.8639	3.39108
Atp6ap2	5	-0.55407	3.39007
Fancm	5	-0.69448	3.3882
Vps51	5	-1.5721	3.38774
2700062C07Rik	5	-0.8755	3.38662
Atg101	5	-0.57808	3.38622
Gemin4	5	-2.7164	3.38248
Fbxo5	5	-1.4847	3.38191
Sap130	5	-1.5093	3.38048
Pus7	5	-0.51886	3.37806
Pno1	5	-3.3044	3.37798
Cenpa	5	-1.9497	3.37648
Cmpk1	5	-0.64589	3.37629
Rrp8	5	-0.48805	3.37531
Chmp6	5	-1.2006	3.37499
Gm10436	5	-0.818	3.37457
Ost4	4	-0.90002	3.37444
Tada2a	5	-1.5318	3.37374
Pde3b	5	-0.50423	3.37128
Smc5	5	-1.2999	3.3707
Tmem251	5	-1.311	3.36813
Gm3448	4	-0.8372	3.36762
Ranbp3	5	-1.5921	3.36737
Soat1	5	-0.54742	3.36649
Ska1	5	-1.8005	3.36638
Snapc1	5	-1.3575	3.36044
Ddx31	5	-1.7099	3.35913
Naf1	5	-1.1418	3.35616
Gtf3c3	5	-2.1152	3.35568
Gatc	5	-0.74162	3.35111
Urb2	5	-2.0315	3.35092
Dars	5	-1.651	3.3506
Gm6763	5	-1.4907	3.34956
Zfp407	5	-1.6277	3.34766
Spc25	5	-2.5094	3.34692
Tipin	5	-2.0228	3.34586
Rnf111	5	-0.4449	3.34346
Gm11237	5	-1.163	3.34278
Ccnd2	5	-0.65959	3.34259
Pabpc1	5	-3.5606	3.3421
Kti12	5	-2.0033	3.33931
Ncapg2	5	-1.4815	3.33829
Pigt	5	-0.57011	3.33709
Obox5	5	-1.7988	3.33497
Actr8	5	-1.9133	3.33384
Nup133	5	-0.73775	3.33343
Csde1	5	-0.89936	3.33174
Bora	5	-1.7603	3.32383
Hmmr	5	-0.63493	3.32287
Slc35b2	5	-0.71222	3.32219
Haus6	5	-1.55	3.31997
Ercc6l	5	-1.5933	3.31724
Cand1	5	-0.67805	3.31436
Hnrnpa0	5	-0.82554	3.3136
Rpl31-ps12	5	-1.7388	3.31211
Pdcd7	5	-2.489	3.31196
Brd1	5	-0.41354	3.30646
Trib1	5	-0.86758	3.30622
Hif1an	5	-0.63851	3.29716
Ska3	5	-1.6709	3.29701
Rqcd1	5	-1.4733	3.29669
Osbpl9	5	-0.98558	3.29489
Myo10	5	-0.47218	3.29272
Ankle2	5	-1.1103	3.29257
Mia2	3	-0.87982	3.28954
Larp1	5	-0.72275	3.28863
Atl2	5	-0.68249	3.28847
4932411E22Rik	3	-1.1569	3.28813
Csnk2a1	5	-0.50395	3.28621
Usb1	5	-0.90809	3.28518
Atp5o	4	-0.61044	3.28118
Pfdn5	5	-0.92248	3.27616
Ubl5	5	-1.4625	3.2742
Taf7	5	-2.3555	3.27357
Isca2	5	-0.62647	3.26914
Setd1a	5	-0.43892	3.26438
Rars2	5	-0.46518	3.26139
Gatad1	5	-0.54151	3.26131
Srrm1	5	-1.6981	3.25842
Cfdp1	5	-0.60917	3.25805
Gpbp1	5	-0.86298	3.25665
Nrn1	5	-0.84205	3.25541
Cdc40	5	-1.6918	3.25109
Mpdu1	5	-0.63814	3.24961
Rpp25l	5	-2.8424	3.24692
Cd3eap	5	-1.9411	3.24663
Hmgcs1	5	-0.67419	3.24185
Dph6	5	-1.3975	3.24004
Nedd1	5	-3.0946	3.23973
4930503E14Rik	5	-1.91	3.23958
Ankfn1	3	-1.1091	3.23418
Grb2	5	-0.55208	3.23392
Ndufb11	5	-0.61141	3.23153
Zscan4f	3	-2.3065	3.22846
Dlgap5	5	-0.9374	3.22567
Lmna	5	-1.0133	3.2242
Nfyc	5	-0.59873	3.22374
Gemin7	5	-2.3205	3.22125
Zwint	5	-1.6424	3.22027
Lamtor3	5	-1.1161	3.21996
Cfap20	5	-1.3713	3.21945
Ncapg	5	-1.1004	3.21589
Cenpm	5	-2.8043	3.21466
Rab7	5	-0.84163	3.20986
Gm8126	4	-2.0485	3.20948
Usp16	5	-0.85566	3.20686
Bub1	5	-1.1403	3.19625
Eefsec	5	-1.1228	3.19448
Rpf2	5	-1.4139	3.19119
Bap1	5	-0.72043	3.18911
Ppil1	5	-2.2283	3.18775
Tcerg1	5	-0.97116	3.18484
Letm1	5	-1.2433	3.18437
Tubb4b	5	-0.47965	3.1843
Gm3259	5	-1.2088	3.18165
Gm28043	5	-0.82986	3.17869
Spcs3	5	-1.2746	3.17567
Med7	5	-1.3277	3.17515
Tead1	5	-0.88318	3.17328
Cdca5	5	-1.2967	3.17265
Wdr70	5	-2.4994	3.17221
Wdr24	5	-1.1586	3.16225
Btbd35f11	5	-3.0703	3.1613
Ccnd3	5	-1.0435	3.16043
Bmpr1a	5	-0.8271	3.16
Pcdhga12	5	-0.021141	3.15988
Tpi1	5	-1.2192	3.15214
Ccdc115	5	-1.004	3.1506
Rragc	5	-1.2002	3.15011
Vps16	5	-1.1073	3.1468
Ipo5	5	-1.1861	3.14602
Pgls	5	-0.64009	3.14517
S100a11	5	-0.7765	3.14447
Taf1c	5	-2.4288	3.14317
Mrpl34	5	-0.57694	3.14186
Zfp598	5	-0.48044	3.13544
Mphosph6	5	-1.7586	3.13539
Sec16a	5	-1.5677	3.13281
Sgms1	5	-0.66612	3.1321
Maea	5	-0.71419	3.13038
Gm21304	5	-1.4951	3.12694
H3f3b	5	-0.31598	3.12588
Cript	5	-0.84739	3.12501
Nol8	5	-1.5023	3.12252
Smim19	5	-0.76505	3.12238
Gm42715	5	-2.0965	3.12055
Mrpl38	5	-0.83884	3.11964
Lmnb1	5	-0.64117	3.11741
Rbm22	5	-1.7432	3.1174
2310011J03Rik	5	-1.4177	3.11584
H2al1i	5	-0.66275	3.11558
Numa1	5	-0.94021	3.10976
Mup18	3	-2.2587	3.10622
Eif4b	5	-0.69576	3.10586
Utp14a	5	-1.4617	3.10382
Sfpq	5	-2.1519	3.10044
Gm1821	5	-0.61842	3.10015
Psmd1	5	-1.5026	3.09833
Sephs1	5	-0.73859	3.09664
Dynlrb1	5	-1.9476	3.0965
Zfp991	4	-1.4552	3.09541
Btbd35f3	5	-2.709	3.09484
Flcn	5	-0.56206	3.08825
Snrnp35	5	-3.4854	3.08798
Cds2	5	-1.606	3.08771
Fanci	5	-0.37621	3.08722
Dld	5	-0.78382	3.0856
Fam210a	5	-1.6047	3.08448
Tmcc1	5	-1.5276	3.0833
Gm10377	3	-1.7968	3.08228
Gm5591	5	-0.50447	3.08173
Atxn10	5	-1.6241	3.08108
Gmeb2	5	-0.66339	3.07945
Kidins220	5	-0.70156	3.0792
Cenpp	5	-1.4035	3.07839
Gm11756	5	-0.97204	3.07795
Brk1	5	-0.95244	3.07753
Wdr92	5	-1.3798	3.07421
Lsm8	5	-1.6259	3.07325
Tgif1	5	-0.5906	3.07257
Dctn3	5	-0.41989	3.07198
Chmp7	5	-1.1232	3.07083
Rfwd2	5	-0.74557	3.06951
Alg5	5	-1.131	3.06925
Smg6	5	-0.58001	3.06456
Actb	5	-0.68419	3.06304
Atrip	5	-1.7751	3.06016
Cenpt	5	-1.9872	3.05838
Lig4	5	-0.3989	3.05634
Gm13272	4	-1.3131	3.05605
Prkrip1	5	-1.4001	3.05489
Taf12	5	-1.2563	3.05413
Txnl4b	5	-1.3191	3.05372
Gtse1	5	-0.96421	3.05126
Ing3	5	-1.0559	3.0483
Vps53	5	-0.97802	3.04147
Gm13278	4	-1.3308	3.04061
Mrpl20	5	-0.91371	3.0403
Gtf2f1	5	-0.82138	3.03754
Atp6v1g1	5	-1.6706	3.0347
BC005624	5	-1.6282	3.03367
Kri1	5	-2.3496	3.03065
Gm13695	5	-1.2426	3.02931
Btbd35f1	4	-2.8144	3.02928
Stk40	5	-0.68486	3.02675
Slc39a10	5	-1.8097	3.02487
Lin9	5	-0.88876	3.02451
Wdr38	5	-0.44479	3.02397
Ap2b1	5	-0.69512	3.02321
Dlg5	5	-0.99138	3.0218
Pabpn1	4	-2.1543	3.02105
BC052040	5	-1.1947	3.02098
Rps6ka3	5	-0.66561	3.01991
Gm20521	3	-2.3289	3.01883
Vmn1r127	5	-1.7357	3.01804
Ppih	5	-0.55698	3.01763
Eif2a	5	-0.66983	3.0171
Gjd2	5	-1.0365	3.01588
Asun	5	-0.72212	3.01173
Pds5a	5	-0.67885	3.00982
Vps11	5	-0.39548	3.008
Cyb5b	5	-0.35974	3.00726
Gm4340	5	-1.6639	3.00709
Mdc1	5	-0.99971	3.00444
Ndufa2	5	-0.46319	3.00411
2700029M09Rik	5	-0.62469	2.99866
Gm3415	3	-1.5474	2.99727
Morf4l2	5	-0.4388	2.99719
Mtif2	5	-0.63226	2.99684
Naa35	5	-1.0333	2.99598
Arhgef18	3	-1.1601	2.99516
Mrpl54	5	-0.49971	2.99375
C1qbp	5	-0.30815	2.99183
Dctn5	5	-1.722	2.99119
Llph	5	-1.1075	2.98936
Gm3667	4	-2.5041	2.98661
Nlgn3	5	-1.2258	2.98577
Ndufb5	5	-0.28638	2.98418
Gabpa	5	-0.9161	2.98384
Atpaf2	5	-0.5937	2.98272
Elp2	5	-2.0728	2.98076
Rpl37rt	5	-0.89239	2.9777
Gm21953	5	-1.4411	2.97322
Mrgprf	5	-0.35409	2.97302
Mrpl23	5	-0.66577	2.97131
Entpd3	5	-0.67413	2.96835
Tsfm	5	-0.37094	2.96811
Sp140	5	-0.0094602	2.96694
Taf13	5	-1.4387	2.96218
Cnot4	5	-0.87588	2.9621
Rc3h1	5	-0.38626	2.95774
Neo1	5	-1.243	2.95288
Ttc33	5	-0.56008	2.95218
Gm7361	4	-3.095	2.9516
Paxbp1	5	-2.167	2.95136
Rtel1	5	-1.3246	2.94993
Nrd1	5	-0.8123	2.94623
H2al1h	5	-1.0672	2.94439
Stip1	5	-0.67516	2.94199
Gm7173	3	-0.70797	2.94138
Slc3a2	5	-0.64836	2.93855
Mad2l2	5	-1.1123	2.93271
Gm10512	5	-0.49014	2.93144
Ftl1	5	-1.5501	2.92904
Hars2	5	-0.55662	2.92808
Alg6	5	-0.7966	2.92801
Fip1l1	5	-1.2651	2.92409
Sptlc1	5	-0.51214	2.9227
Naa30	5	-1.1517	2.92209
Mogs	5	-0.36866	2.92064
Flii	5	-0.72132	2.91999
Dicer1	5	-0.77769	2.91768
Tsen15	5	-1.9019	2.91507
Cyc1	5	-0.82942	2.91314
Acly	5	-0.32948	2.91165
Gm3636	5	-3.221	2.91158
Daxx	5	-0.68041	2.90598
Eif2ak4	5	-0.75526	2.90379
Xpot	5	-0.40363	2.90295
Hist1h4f	5	-1.4225	2.90053
Gfm1	5	-0.52461	2.89949
C330021F23Rik	2	-5.117	2.89887
Gm3629	3	-1.7465	2.89201
Rmi1	5	-0.85864	2.89025
Suds3	5	-0.66404	2.88924
Denr	5	-1.0821	2.88911
Becn1	5	-1.0144	2.8885
Ddx55	5	-1.7645	2.88429
Med8	5	-1.6186	2.88131
Tmem238	5	-1.0781	2.88084
Zfp335	5	-3.1545	2.88038
Arhgef12	5	-0.57208	2.87943
Arfrp1	5	-1.6277	2.87913
Hist1h4h	5	-0.31695	2.87801
Parn	5	-0.85053	2.87667
Gm15772	5	-2.3603	2.87423
Mpp5	5	-0.59109	2.87364
Gm49776	5	-1.3473	2.87351
Spns1	5	-0.48937	2.87315
Gm5796	4	-1.4555	2.86816
Uqcrb	5	-0.40721	2.86806
3110040M04Rik	5	-0.80265	2.86471
Gm14435	5	-0.91324	2.86129
Nup35	5	-0.99542	2.86056
Hist1h2bj	2	-6.4718	2.85661
Slc7a5	5	-0.63037	2.85341
Rbm33	5	-1.5264	2.85023
Gm9639	5	-0.64969	2.8497
Btaf1	5	-0.96564	2.84866
Ino80b	5	-1.9984	2.84774
Ehmt1	5	-0.55316	2.84686
Gm13057	4	-1.0627	2.84555
Cmtr2	5	-0.60924	2.84548
Nelfa	5	-1.0673	2.84521
Aars2	5	-0.46742	2.84463
Rab14	5	-0.84169	2.84454
Gm16405	3	-1.4709	2.83971
Lsm11	4	-2.3847	2.83899
Ints7	5	-0.81781	2.83818
Timm9	5	-1.9332	2.83603
Dnlz	5	-0.81001	2.83514
Lsm12	5	-0.95705	2.83479
Sh3gl2	5	-1.4485	2.83203
Tvp23a	5	-0.5214	2.82971
Zcrb1	5	-1.2238	2.82883
Nars2	5	-0.90075	2.82655
Nr2c2ap	5	-1.1769	2.82478
Usp1	5	-0.5712	2.8246
Srp9	5	-1.5753	2.82417
E430025E21Rik	5	-0.5937	2.82405
Ccnt1	5	-0.54749	2.82145
Sp1	5	-0.77385	2.82097
Stx18	5	-1.0641	2.81873
Rad54l2	5	-1.2074	2.81707
Gm10486	5	-3.2541	2.81542
1700031F05Rik	5	-0.5778	2.81511
Snapin	5	-0.34715	2.81254
Capn5	5	-0.29685	2.81237
Hdac8	5	-0.39704	2.81012
Atp6v1c1	5	-1.2669	2.80928
Tmem35	5	-0.6154	2.80894
Tomm70a	5	-0.71985	2.80813
Ptpn23	5	-0.43631	2.80746
A430089I19Rik	5	-1.6274	2.80635
Slc35b1	5	-1.6887	2.80515
Tmem242	5	-0.39177	2.80438
Aip	5	-0.44827	2.80421
AC168977.1	5	-1.1247	2.8038
Cks2	5	-0.68842	2.8033
B3galnt1	5	-0.38103	2.79909
Hist1h4b	5	-0.5025	2.79896
Supv3l1	5	-0.7692	2.79798
Ube4b	5	-0.68664	2.79577
Sprr2a2	3	-1.4542	2.79496
Fus	5	-0.41762	2.7939
2310036O22Rik	5	-0.94904	2.79301
Dnaja2	5	-0.84	2.79277
Wtap	5	-1.3343	2.79172
Hira	5	-0.85073	2.79035
Mllt4	5	-0.573	2.78569
Casc5	5	-1.1756	2.78325
Gm4303	5	-1.4733	2.78267
Alg8	5	-0.3761	2.77947
Nisch	5	-0.3011	2.7733
Fdps	5	-0.65627	2.7717
Zfp148	5	-0.97304	2.7715
Gsg2	5	-0.22335	2.76815
Senp6	5	-1.121	2.76339
Ccar1	5	-0.54939	2.75706
Wdr7	5	-1.3095	2.75684
Gm14151	5	-0.54786	2.7469
Btnl6	5	-0.57651	2.74647
Rapgef2	5	-0.95078	2.74627
Actr6	5	-1.5625	2.74321
[truncated: 19,243 more rows]

## Sheet: Mouse ortholog_Non-Essential
gene
Calhm1
Crip1
Hhat
Rspo3
C2cd4c
Zic4
Vwa5a
Cptp
Gprc5d
Myh2
Kcnh8
Abca8b
Slc8b1
Mindy4
Atp2c2
Tmem9
Zfp879
Ptgfr
Cdnf
Oc90
Avpr2
Ckmt2
Gldn
Cfap47
Fam172a
Nlrc4
Zfp738
Scamp5
Adamdec1
Serpina11
1810055G02Rik
Htr2c
Hspb3
Cst7
Styk1
Akap9
Snx33
Rab31
Tbx19
Rab32
Gem
Cxcr4
Pdgfb
Sh3bp5
Tas2r108
Aox1
Cpa4
Usp53
Zfp358
Pdpn
Vamp2
Csrnp2
Syce1
Slfn4
Angptl1
Mpp4
Tex261
R3hdm2
Cxxc5
Zbtb26
Nova1
Hdac9
Acrbp
Minar1
Pof1b
Prp2
Fzd8
Tjp2
Kpna1
Ermard
Vat1l
Msln
Rgs4
Mst1r
Mras
Hspb1
Sbpl
Stk10
Ssu2
Scmh1
Rtca
Ankrd1
Abl2
Sod3
Adam39
Rnf17
Stat4
Sftpa1
Zcchc12
Treml4
Txlnb
Tm6sf1
Sel1l2
Dsg3
1810030O07Rik
Il17ra
Galr1
Immp1l
Rln1
Cfap58
Sting1
Wnt10a
1700019N19Rik
Foxn2
Chrna2
Cetn1
Bckdk
Masp1
Aldh1a2
Nrn1l
Lhfpl4
Plekhb2
Alx1
Cask
Pnrc1
Calhm6
Ms4a14
Kansl1l
Psapl1
Hpn
Ccdc81
Krt40
Clec1b
Lsmem1
Stmnd1
Fgf9
Bclaf3
Acod1
Cyp19a1
Slc45a3
Slc29a3
Zfp821
Wee2
Cdc42se2
Mettl22
Nln
Myh4
Neurl1b
Acsf3
Sgk2
Ripply2
Nap1l2
Efcab9
Ugt2b1
Tal2
Zfp385b
Cyp2c29
Cyp11b1
Vps13c
Mex3d
Kcnt2
Fam174b
Armc12
Trp53i11
Il13ra2
Gpr6
Tanc1
Zfp354a
Gucy2c
Slc49a4
Ankrd34c
Cdh22
Pltp
Trap1
Cemip
Slco1a5
Tspan13
Magea9
Alox12
Rabgap1
S100a4
Adam8
Tmem79
Arrdc5
Serpinb12
Plscr5
Nalcn
Havcr2
Igfbp5
Mtpn
Myof
Zmiz2
Plin2
Rab20
Rbm46
Unc5c
Zbtb33
Pald1
Fbxo6
Zscan29
Fut8
Cldn1
Myoz3
D630023F18Rik
Inha
Pjvk
Tafa2
Arhgef10l
Siglece
Nme7
2900026A02Rik
Lnpk
Neil3
Syp
Mageb2
Tmem252
Mep1b
Stra8
Mmp3
Serpine1
Sox18
Bsx
Nhsl1
S100b
Trabd
Pla2g4e
Zfp62
Itgb8
Kirrel3
Tmx4
Pik3c2g
Shisa3
Pcsk1
Zfp583
Spock3
Fam110c
Bdnf
Rab33b
Vwc2
Rbak
Aadacl3
Traf3ip1
Angptl8
S100a4
Csmd1
Scn11a
Hltf
Slc9b2
Slurp2
Col22a1
Fam114a1
Pcdhb3
Gm15262
Fhl5
Sowahd
Brpf3
Celf4
Fam210b
P2ry1
Atg2b
Gpr52
Spink6
Atp6v0a4
Cpne9
Susd1
Tmem14c
Nipal4
Fabp6
Kctd4
Slit1
Tcf24
Ackr3
S100a13
Nxph3
Shisa9
Plekhg1
Hipk3
Sox21
Fmo3
Scimp
Zscan22
Pnpla1
Gfral
Zscan5b
Fcgr4
Pofut2
Dcdc2a
Sh2d1a
Tcp11
Sema3a
Bbs2
Ackr1
Smco1
Pclaf
Inava
Acpp
Tcerg1l
Mgp
Srpx
Chrm3
Hacd1
1190005I06Rik
Prr5l
Ret
Mdfic
Bin3
Vsir
Ndrg1
Btg3
Ephb2
Tnfrsf1b
Hnrnpll
Heatr4
Cc2d2b
Ccdc138
Mc2r
Tmem86a
Ankrd16
Arhgap15
Txndc5
Defb41
Gm36255
Cyb5d1
Rassf1
Lrrn4
Muc16
Sele
Mpped2
Fhl2
Tas2r119
Dpysl3
D430041D05Rik
Slco1b2
Napb
Neto1
Arap2
Bpifb6
Ascl3
Spatc1
Zfp652
Slc26a9
Cdk15
Palld
Arf5
Zkscan2
Zswim2
Maoa
Cfap44
Asb2
Pls3
Cipc
Fbxo44
Cacna1e
Cngb1
Sdcbp2
Cpa1
Vax1
Zp1
Wfdc2
N4bp2l1
Slc13a3
Galnt7
Liph
Maged1
Epha4
Fcgrt
Lipf
Fam163a
Arpin
Tcea3
Mvp
Gsdme
Rab19
Sbf2
Zfp518b
Rnasel
Lman1l
Ntn3
Grip1
Tas2r130
Calr3
Atp6v1e2
Stard13
Capns2
Magea10
Senp5
Mtcp1
Dock3
C1qtnf6
Gmnc
Cfap73
Cep70
Pcdh18
Ap3b2
Foxr2
Nuggc
Gm38999
Tmem43
Fthl17a
Trpv6
Optn
Ppp1r17
Gpr39
Cd1d1
Cdc34
Adck1
Tnfsf18
Slc7a3
Map1a
Fam89a
Txndc8
Sertad4
Csn3
Themis2
Hspb8
Rbp1
Slc35b3
Ccl28
Apol8
Ctnnal1
Ky
Sybu
Tdrd1
Proser1
Slc45a4
Klhl28
Acadm
Tram1
Ankmy1
Panx2
Mucl3
Ogfrl1
Pdlim1
Capn6
Zg16
Ccrl2
Rgs8
Rgs11
Blcap
Nemp1
Stmn3
Slc9a6
Ctnna3
Il17re
Pip
Klhl17
Ccdc88c
Ppp1r3b
Pigg
Tpo
Zscan29
Hbq1b
1700031M16Rik
Slc25a4
Rasgef1b
Fbxw5
Odc1
Fgf2
Rapgef5
Rmdn1
Tmem184b
Nkx3-1
Igip
Cry2
Obi1
Actn2
Birc3
D17H6S53E
Plppr2
Phf1
Zfp239
Ttr
Calb1
Socs2
Zfp112
Epha3
Gpr26
Ogn
Slc28a1
Ndn
Cntn4
Sycp2l
S100a8
Wscd2
Nipal1
Gria3
Kel
Rtl6
Spa17
Phf7
Slitrk5
Dusp21
Zyg11a
Intu
Zup1
Pigq
Ppil6
Cdh19
Dusp7
D630003M21Rik
Mccc1
Entpd6
Zmym5
Dgat2
Prdm6
Armcx1
Prrg3
Hrh1
Txndc2
Tmem47
Fxyd2
Zfp711
Lonrf1
Erich6b
Crabp1
Tmem202
Catsper3
Chmp2b
Exoc3l4
Gjb1
Sema5a
Tex38
Cnst
Egfl6
Chrna6
Dydc2
Tex11
Calu
Dnah9
Sestd1
Piga
Nudt15
Sumo3
Rnf43
Rgs12
Bnip3l
Tex33
Slc22a16
Plekha1
Adamts12
Kcnip4
Rab11fip5
Prom1
Pla2g15
Aadacl4
Nynrin
Adamts6
Sirpb1b
Mmp14
Stx17
Cd70
Tmem222
Unc5d
Cpz
Lpcat2
Gpr149
Ids
Tbx22
Scube1

## Sheet: Mouse ortholog_Core-Essential
gene
Aamp
Aars
Abcb7
Abce1
Abcf1
Abt1
Actl6a
Actr10
Actr2
Adsl
Afg3l2
Ahctf1
Ak6
Akirin2
Aldoa
Alg1
Alg11
Alg14
Alg2
Alyref
Anapc1
Anapc10
Anapc11
Anapc2
Anapc4
Anapc5
Ankle2
Aqr
Arcn1
Arih1
Arl2
Armc7
Atp1a1
Atp2a2
Atp5j2
Atp6ap1
Atp6v0b
Atp6v0c
Atp6v0d1
Atp6v1a
Atp6v1b2
Atp6v1c1
Atp6v1e1
Atp6v1f
Atp6v1g1
Atr
Aurka
Aurkb
Banf1
Banp
Bcas2
Bcl2l1
Birc5
Bms1
Bop1
Brd4
Brf1
Brf2
Brix1
Bub1b
Bub3
Bud23
Bud31
Bysl
9930104L06Rik
Cactin
Capzb
Cars
Ccna2
Ccnd1
Ccnh
Ccnk
Cct2
Cct3
Cct4
Cct5
Cct6a
Cct7
Cct8
Cdan1
Cdc123
Cdc16
Cdc20
Cdc23
Cdc27
Cdc37
Cdc42
Cdc45
Cdc5l
Cdc6
Cdc7
Cdc73
Cdca5
Cdca8
Cdk1
Cdk7
Cdk9
Cdt1
Ccdc84
Cenpa
Cenpe
Cenpk
Cenpn
Cenpw
Cfap298
Chaf1a
Chaf1b
Chchd4
Chd4
Chek1
Cherp
Chmp2a
Chmp4b
Chmp6
Ciao1
Ciao2b
Ciao3
Ciapin1
Ckap5
Clns1a
Clp1
Clspn
Cltc
Cmpk1
Cnot3
Copa
Copb1
Copb2
Cope
Copg1
Cops2
Cops4
Cops5
Cops6
Cops8
Copz1
Cpsf1
Cpsf2
Cpsf3
Cpsf4
Crcp
Crkl
Crnkl1
Cse1l
Csnk2b
Cstf3
Ctcf
Ctdp1
Ctr9
Cwc22
Dad1
Dars
Dbr1
Dctn5
Dctn6
Ddb1
Ddost
Ddx10
Ddx18
Ddx20
Ddx21
Ddx23
Ddx24
Ddx27
Ddx3x
Ddx41
Ddx42
Ddx47
Ddx49
Ddx51
Ddx54
Ddx55
Ddx56
Dhdds
Dhx15
Dhx16
Dhx33
Dhx37
Dhx8
Dhx9
Dimt1
Dkc1
Dmap1
Dnajc17
Dnajc8
Dnajc9
Dnm2
Donson
Dpagt1
Dtl
Dtymk
Dut
Dync1h1
Dync1i2
Dynlrb1
Ebna1bp2
Ecd
Ect2
Eef1b2
Eef1g
Eef2
Efl1
Eftud2
Eif1
Eif1ad
Eif1ax
Eif2b1
Eif2b2
Eif2b3
Eif2b4
Eif2b5
Eif2s1
Eif2s2
Eif2s3x
Eif3a
Eif3b
Eif3d
Eif3e
Eif3f
Eif3g
Eif3i
Eif4a1
Eif4a3
Eif4e
Eif5
Eif5a
Eif6
Elac2
Ell
Elob
Eloc
Elp5
Eprs
Ercc2
Ercc3
Erh
Espl1
Ess2
Etf1
Ewsr1
Exosc2
Exosc3
Exosc4
Exosc6
Exosc7
Exosc8
Exosc9
Fam133b
Farsa
Farsb
Fau
Fbl
Fbxo5
Fcf1
Fip1l1
Fnta
Ftsj3
Gapdh
Gars
Gbf1
Gemin5
Ggps1
Ggt1
Gins1
Gins2
Gins3
Gins4
Gmppb
Gmps
Gnl2
Gnl3
Gosr2
Gpkow
Gpn1
Gpn2
Gpn3
Gps1
Grb2
Grpel1
Gspt1
Gtf2a2
Gtf2b
Gtf2e1
Gtf2e2
Gtf3a
Gtpbp4
Guk1
H2ac20
H2bc21
H2bc3
H2bc6
H2bc6
Hars
Haus1
Haus3
Haus4
Haus5
Haus6
Haus7
Hcfc1
Hdac3
Heatr1
Hinfp
Hjurp
Hmgcr
Hmgcs1
Hnrnpc
Hnrnph1
Hnrnpk
Hnrnpl
Hnrnpu
Hspa5
Hspa9
Hspd1
Hspe1
Hyou1
Iars
Igbp1
Ik
Ilf2
Ilf3
Imp3
Imp4
Incenp
Ints1
Ints11
Ints2
Ints3
Ints6
Ints7
Ints8
Ints9
Ipo11
Ipo13
Iscu
Isg20l2
Isy1
Kansl2
Kansl3
Kars
Kat8
Kcmf1
Kif11
Kif18a
Kif23
Kin
Kpnb1
Krr1
Lars
Las1l
Letm1
Lonp1
Lrr1
Lsg1
Lsm2
Lsm3
Lsm4
Lsm5
Lsm6
Lsm7
Lsm8
LTO1
Luc7l3
Lyrm4
Mad2l1
Mad2l2
Magoh
Mak16
Mars1
Mastl
Mat2a
Mcm2
Mcm3
Mcm3ap
Mcm4
Mcm5
Mcm6
Mcm7
Mdn1
Med11
Med14
Med17
Med20
Med22
Med27
Med28
Med30
Med31
Med4
Med6
Med8
Mepce
Mettl16
Mfap1a
Mis12
Mms22l
Mphosph10
Mrpl34
Mrps21
Mrto4
Mtbp
Mtor
Mtrex
Mvk
Myc
Mzt1
Naa10
Naa15
Naa50
Naca
Napa
Nars
Nat10
Ncapd2
Ncapg
Ncapg2
Ncaph
Ncbp1
Ncbp2
Ndc80
Nedd1
Nedd8
Nelfb
Nepro
Nfs1
Nifk
Nip7
Nkap
Nle1
Nmd3
Nob1
Noc4l
Nol10
Nol6
Nol9
Nop10
Nop14
Nop16
Nop2
Nop56
Nop58
Nploc4
Nrbp1
Nrde2
Nrf1
Nsa2
Nsf
Nsl1
Nubp1
Nudt21
Nuf2
Nup133
Nup155
Nup160
Nup205
Nup214
Nup43
Nup85
Nup88
Nup93
Nus1
Nutf2
Nvl
Nxf1
Ogt
Orc1
Orc6
Osgep
Pabpc1
Pabpn1
Pafah1b1
Pak1ip1
Pam16
Pcbp1
Pcbp2
Pcf11
Pcid2
Pcna
Pdap1
Pdcd11
Pdcd2
Pdcd7
Pdpk1
Pdrg1
Pelp1
Pes1
Pfdn2
Pfdn6
Pgd
Phax
Phb
Phb2
Phf5a
Pkmyt1
Plk1
Plk4
Pmf1
Pmpca
Pmpcb
Pnn
Pola2
Pold1
Pold2
Pold3
Pole
Pole2
Polr1a
Polr1b
Polr1c
Polr1f
Polr2b
Polr2c
Polr2d
Polr2e
Polr2f
Polr2g
Polr2h
Polr2i
Polr2l
Polr3a
Polr3b
Polr3c
Polr3f
Polr3h
Polr3k
Pop1
Pop4
Pop5
Ppa1
Ppan
Ppil2
Ppil4
Ppp1cb
Ppp1r10
Ppp1r11
Ppp1r12a
Ppp1r8
Ppp2ca
Ppp2r1a
Ppp4c
Ppwd1
Prc1
Preb
Prelid1
Prelid3b
Prim1
Prmt1
Prmt5
Prpf19
Prpf3
Prpf31
Prpf38a
Prpf38b
Prpf4
Prpf40a
Prpf6
Prpf8
Psma1
Psma2
Psma3
Psma4
Psma5
Psma6
Psma7
Psmb1
Psmb2
Psmb3
Psmb4
Psmb5
Psmb6
Psmb7
Psmc1
Psmc2
Psmc3
Psmc4
Psmc5
Psmc6
Psmd1
Psmd11
Psmd12
Psmd13
Psmd14
Psmd2
Psmd3
Psmd4
Psmd6
Psmd7
Psmg3
Psmg4
Ptpn23
Puf60
Pwp2
Qars
Rabggta
Rabggtb
Racgap1
Rack1
Rad17
Rad21
Rad51
Rad9a
Rae1
Ran
Rangap1
Rbbp4
Rbbp5
Rbbp6
Rbm14
Rbm17
Rbm22
Rbm25
Rbm39
Rbm8a
Rbmx
Rbmx
Rbx1
Rcc1
Rcl1
Rfc2
Rfc3
Rfc4
Rfc5
Rint1
Riok1
Riok2
Rnf113a1
Rngtt
Rnmt
Rnpc3
Rnps1
Romo1
Rpa1
Rpa2
Rpa3
Rpain
Rpap1
Rpap2
Rpf2
Rpl10a
Rpl11
Rpl12
Rpl13
Rpl14
Rpl17
Rpl18
Rpl18a
Rpl19
Rpl23
Rpl24
Rpl26
Rpl27
Rpl27a
Rpl3
Rpl30
Rpl31
Rpl32
Rpl35
Rpl36
Rpl37
Rpl37a
Rpl38
Rpl4
Rpl5
Rpl7
Rpl7a
Rpl8
Rplp0
Rplp1
Rplp2
Rpp14
Rpp21
Rpp38
Rpp40
Rps11
Rps12
Rps13
Rps14
Rps15
Rps15a
Rps16
Rps18
Rps19
Rps20
Rps21
Rps23
Rps24
Rps25
Rps27a
Rps29
Rps3
Rps4x
Rps5
Rps6
Rps7
Rps8
Rps9
Rrm1
Rrm2
Rrp1
Rrp12
Rrp9
Rrs1
Rsl1d1
Rtf2
Ruvbl1
Ruvbl2
Sacm1l
Sae1
Sap18
Sap30bp
Sars
Sart1
Sart3
Sbds
Sbno1
Scap
Scfd1
Sdad1
Sde2
Sdhc
Sec13
Sec61a1
Sec61g
Seh1l
Sem1
Senp6
Setd1a
Sf1
Sf3a1
Sf3a2
Sf3a3
Sf3b1
Sf3b2
Sf3b3
Sf3b4
Sf3b5
Sf3b6
Sfpq
Sgo1
Sin3a
Skp1
Slc35b1
Slc39a7
Slc7a6os
Slu7
Smc1a
Smc2
Smc3
Smc4
Smg5
Smg6
Smndc1
Smu1
Snapc1
Snapc2
Snapc3
Snapc4
Snapc5
Snf8
Snrnp200
Snrnp25
Snrnp27
Snrnp35
Snrnp70
Snrpa1
Snrpb
Snrpd1
Snrpd2
Snrpf
Snu13
Snupn
Snw1
Sod1
Sod2
Son
Spata5l1
Spc24
Spc25
Spcs3
Spdl1
Spout1
Srbd1
Srcap
Srp19
Srp54b
Srp72
Srp9
Srsf1
Srsf11
Srsf2
Srsf3
Srsf7
Ss18l2
Ssrp1
Ssu72
Stx18
Stx5a
Supt16
Supt5
Supt6
Supv3l1
Syf2
Sympk
Sys1
Taf1c
Taf6
Tango6
Tardbp
Tars
Tbca
Tbcb
Tbcd
Tbl3
Tcp1
Tfip11
Thap1
Thoc1
Thoc2
Thoc3
Thoc5
Thoc7
Ticrr
Timeless
Timm10
Timm13
Timm23
Tinf2
Tnpo3
Tomm22
Tomm40
Tonsl
Top1
Top2a
Top3a
Topbp1
Tpr
Tpt1
Tpx2
Trappc1
Trappc11
Trappc3
Trappc5
Trappc8
Triap1
Trmt112
Trnt1
Trrap
Tsg101
Tsr1
Tsr2
Ttc1
Ttc27
Tuba1b
Tubb5
Tubg1
Tubgcp2
Tubgcp3
Tubgcp4
Tubgcp5
Tut1
Txn1
Txnl4a
Txnl4b
U2af1
U2af2
U2surp
Uba1
Uba2
Uba52
Ube2i
Ube2l3
Ube2m
Ube2n
Ubl5
Ubr4
Ubtf
Ufd1
Upf1
Upf2
Urb1
Uri1
Usp36
Usp39
Usp5
Uspl1
Utp11
Utp15
Utp20
Utp25
Utp4
Utp6
Uxt
Vars
Vcp
Virma
Vmp1
Vps25
Vps28
Wars
Wbp11
Wdhd1
Wdr1
Wdr12
Wdr18
Wdr3
Wdr33
Wdr43
Wdr46
Wdr5
Wdr55
Wdr74
Wdr75
Wdr77
Wdr82
Wee1
Xab2
Xpo1
Xrcc5
Xrcc6
Xrn2
Yae1d1
Yars
Yars2
Ybx1
Yju2
Ykt6
Yrdc
Zbtb11
Zbtb8os
Zmat2
Zfp131
Zfp207
Znhit2
Zpr1

## Sheet: In vitro depeleting (defined)
id
Rpl37a
Eef2
Rpl15
Ssu72
Nle1
Rpl8
Rps23
Ruvbl2
Hspa5
Pcna
Kpnb1
Fau
Psmb1
Rpl35
Rpl5
Hnrnpk
Rpl13a
Eif2s3x
Tars
Cct3
Polr2e
Gnb2l1
Eef1e1
Farsa
Vhl
Pold2
Twistnb
Polr1b
Plk1
Rpl23a
Aldoa
Polr2l
Gtpbp4
Pold1
Phb2
Rpl3
Prpf4
Eef1a1
Nhp2l1
Sod1
Cdk4
Usp39
Hnrnpu
Ncl
Alg1
Rpl27a
Supt16
Chek1
Ddx56
Rpl32
Eprs
Eif3f
Rpl19
Nol9
Cdk7
Ppp1cb
Rpl9
Clns1a
Rps8
Ect2
Rpl26
Rsl24d1
Mcm7
Eif4e
Psma6
Ppan
Psma5
Ssrp1
Eif4a1
Rrm2
Rpl23
Aurka
Hspa9
Rpl17
Top3a
Txnl4a
Polr2b
Smu1
Psmc5
Polr2a
Rps27
Pop5
Psma7
Pola2
Exosc10
Prpf8
Psmb5
Atp2a2
Mepce
Aars
Xpo1
Cdc20
Ddx23
Ddx41
Wdr82
Eif5a
Rpl18
Rrm1
Polr3b
Srsf3
Chmp4b
Dkc1
Psmb6
Psma3
Tubb5
Psmd14
Rpsa
Setd8
Vcp
Gars
Banf1
Rpl21
Usp7
Rbbp6
Ddb1
Polr3h
Cpsf3
Rps29
Rps15
Cdc23
Cpsf1
Cct2
Alg2
Atp2b1
Abce1
Qars
Snrpa1
Copa
Polr2g
Tut1
Rpl11
Polr2c
Espl1
Rpl37
Nudc
Rps9
Rad9a
Rabggtb
Nup93
Rpl35a
Fermt2
Rfc5
Txnrd1
C330021F23Rik
Myc
Polr1c
Wars
Psmb7
Prc1
Stx5a
Psma1
Rpl34
Rpl14
Rps3
Eftud2
Pop1
Rplp2
Psma4
Mcm6
Psmd12
Rpp40
Pfn1
Gm25212
Gm23284
Uba52
Rpl10
Dtymk
Kat5
Rps17
Vars
Sf3b3
Ndc80
Upf1
Pisd
Gps1
Dhps
Thg1l
Rpl38
Rpl24
Gpx4
Iars
Pole2
Snrpd2
Scfd1
Csnk1a1
Rps13
Anapc11
Cct4
Rps14
Rps20
Pola1
Mdm2
Uba1
Bop1
Rps3a1
Cdc73
Rps10
Xrn2
Kif4
Cdk9
Sf3a3
Gm22109
Nxf1
Anapc1
Cse1l
Rps7
Gnl3
Bub3
Dbr1
Xab2
Dut
Pop7
Skiv2l2
Ran
Eif2b2
Psmb4
Rrn3
Rpl4
Hmgb1
Snrnp40
Cpsf3l
Snrnp70
Wdr43
Nfs1
Cdk1
Clp1
Timm10
Diexf
Taf1
Ddx49
Slc39a7
Psmd4
Polr2f
U2af1
Usp37
Gm26504
Tsr2
Ttk
Brf2
Eif3i
Npm1
Exosc6
Mastl
Gm10413
Rpl7
Dtl
Srsf1
Mars
Cdt1
Nars
Gm3752
Gm14327
Cdipt
Eif2s1
Btbd35f18
Snrpb
Pole
Deb1
Rps27a
Prpf6
Vps25
Psma2
Rps21
Sart3
Gm11361
Pi4ka
Dhx38
Ddx3x
Chaf1b
Eif2b4
Rpl6
Gnl2
Sf3b5
Eif2s2
Polr1d
Eif3b
Cct7
Gtf2h2
Prpf19
Polr1a
Dnajc9
Rac1
Rps15a
Atp6v1a
Polr3e
Rps4x
Brf1
Nop16
Ints9
Tuba1b
Znrd1
Gm22291
Cct5
Polr1e
Lsm4
Pfdn2
Mis18a
Nuf2
Utp23
Cct6a
Tbcc
Pmpcb
Slmo2
Las1l
Ddx21
Rplp0
Prpf31
Prelid1
Dhx37
Dhx33
Rpa1
Rpl12
Nop2
Trappc1
Ddx54
Rpl36
Rbx1
Ufd1l
Pes1
Snrpg
Isy1
Bysl
Rpl30
Gm10487
Nop58
Nsf
Anln
Naa25
Eif3a
Eif3g
Bms1
Sf3b4
Trmt112
Narfl
Utp6
U2af2
Tsr1
Rptor
Gm2000
Snrpf
Orc5
Rps6-ps4
Ticrr
Dhx15
Puf60
Utp18
Wdr3
Utp15
Rpl31
Wdhd1
Sec61a1
Rbm8a
Gm14632
Rps26
Gm12070
Rps11
Mbtps1
Rps28
Cebpz
Gtf3c1
Rad51
Taf3
Zcchc9
Rrp1
Nup205
Armc7
Gins2
Kin
Mfap1b
Wdr46
Gtf3c5
Srp14
Gm21083
Tcp1
9930104L06Rik
Kars
Noc2l
Exosc7
Nol6
Crnkl1
Wee1
Nop9
Hars
Rpl13
Sf3b1
Tomm40
Nip7
Cdca8
Lsm5
Pdcd11
Imp3
Rpa3
Ecd
Cdc45
Snip1
Eif5b
Cct8
Dync1i2
Donson
Rbm39
Tonsl
Psmd11
Rpl39
Gm11554
Nus1
Hspa8
Ttf1
Eif5
Dna2
Vmp1
Srsf2
Gm10406
Cdc6
Mak16
Eif3c
Sf3a2
Birc5
Chaf1a
Rfc2
Gm4187
Sdad1
Eif4a3
Terf2
Tti2
Eif2b1
Prpf38b
Eif2b5
Ints3
Eif1ad
Atp6v0c
Thoc2
Cnot3
Urb1
Gm49450
Mcm4
Tsen54
Gm15319
Kif23
Mdn1
Dnttip2
Lsm7
Rps5
Ppp1r12a
Pwp2
Phf5a
Rpl7a
Gm25018
Emg1
Trappc8
Rplp1
Hscb
Gm21119
Gfer
Oraov1
Psmc4
Cdc16
Orc1
Rpl10a
Nubp1
Cirh1a
Nelfb
Utp3
Supt6
Prkrir
Nifk
Bud13
Rrp7a
Psmg4
Psmc6
Gspt1
Psmd6
Ccdc84
Gm3383
Nsl1
Lrr1
Orc2
Gnb1l
Lsm2
Zbtb8os
Lage3
Rps18
Oip5
Sfi1
Eif2b3
Eif3m
Xrcc3
Isg20l2
Hspe1
Sap30bp
Orc3
Rnu6
Mrto4
Rfc4
Snrpd3
Psmb3
Ddx19a
Btbd35f15
Hinfp
Osgep
Psmg2
Uxt
Rps6
Rcl1
Ddx51
Thoc5
Wdr75
Exosc4
Nhp2
Zbtb11
Nom1
Gm10096
Nutf2
Rpl36a
Sf1
Txndc17
Ythdc1
Nipbl
Ruvbl1
Gm2897
Rpl27
Kif18b
Hist1h2bj
Rnpc3
Gtf2a2
Wdr55
Exosc2
Gm10058
Eif6
Rpl29
Eif1
Rps16
Dhx8
Psmc3
Gm12191
Rps12
Eif3d
Rps24
Gm26391
Preb
Gle1
Ints4
Gm3667
Gm7361
Rpl18a
Abt1
Gm3264
Gm10488
Rps25
Cdc5l
Zfp207
Kif20a
Sf3b2
Etf1
Snrpd1
Pabpc1
Kif11
Gm10230
Gtf2b
Prpf3
Znhit2
Gm16451
Wdr74
Gm10147
Ddx24
Ttc27
Gm14819
