# Supplementary material for: CRISPR-StAR enables high-resolution genetic screening in complex in vivo models
Source: Springer Nature journal article supplement (doi:10.1038/s41587-024-02512-9), 2024-12-16
Supplement: MOESM22 [file 41587_2024_2512_MOESM22_ESM.xlsx]

## Sheet: Fig4c-e
gene	neg.lfc.invitro.withDab	minRRA.score.invitro.withDab	num.invitro	neg.lfc.invitro.noDab	minRRA.score.invitro.noDab	neg.lfc.invivo	minRRA.score.invivo	num.invivo	group
2310067B10Rik	0.17613	0.120199	15	0.087881	1.5461	0.12883	0.713903	24	Other
4933434E20Rik	-0.22638	1.09646	15	-0.50427	2.85764	-2.1892	3.49651	38	Other
9330182L06Rik	0.12019	0.641551	15	0.012894	1.10015	0.41147	1.38431	34	Other
Aars2	-0.51037	2.72349	15	-0.076722	2.5761	-1.4036	2.99974	26	Other
Acbd5	0.085448	0.134405	15	-0.12208	0.944125	0.56247	1.1298	24	Other
Aco1	-0.16999	0.472989	15	0.081046	0.310105	0.19329	1.97803	32	Other
Aco2	-0.11962	0.799752	15	0.026284	0.335612	-0.31787	0.551093	45	Other
Acsl6	0.078361	0.495855	15	-0.63978	1.57047	0.041888	0.456988	26	Other
Acsm5	0.15877	0.830179	15	0.26401	0.573977	0.096265	0.645277	34	Other
Actg1	-0.56104	3.25877	15	0.66927	0.484166	0.37682	1.72876	17	Other
Acvr1b	0.15857	0.290755	15	0.28609	1.62806	-0.24232	0.671254	37	Other
Adam10	0.24658	0.8177	15	0.35973	0.156998	-0.41955	2.65971	36	Other
Adam2	0.37063	0.358615	15	0.1589	0.29851	2.2795	2.41482	21	Other
Adcy3	0.15541	0.28013	15	0.30151	2.2043	0.65339	0.935168	27	Other
Adprm	0.43212	0.402864	15	0.18275	1.02433	-0.064734	0.41419	27	Other
Adsl	-0.1322	0.091113	15	-0.79275	2.86271	-0.041849	1.87841	27	Other
AI467606	0.0705	0.0706986	15	0.1082	0.931332	0.46117	0.716676	34	Other
Aip	-0.48234	1.48138	15	-0.047187	0.965933	-5.6286	5.06875	28	Other
Akap13	0.02702	0.0353256	15	0.50417	0.793957	-0.11276	0.592796	28	Other
Alcam	0.18563	1.14607	15	0.24217	0.469147	0.68614	1.47843	29	Other
Aloxe3	0.22662	0.239781	15	0.28044	0.447599	0.25782	0.187514	43	Other
Ambra1	1.2898	23.4641	15	2.963	5.62571	6.4259	16.8186	65	Other
Amdhd1	-0.014656	0.0612952	15	-0.55356	1.14915	-0.1313	0.578577	32	Other
Ampd3	0.25133	0.453729	15	0.31361	0.428082	-0.48819	0.681853	30	Other
Amy2a5	-1.3839	13.5431	15	-0.43532	3.79436	-1.2043	1.30021	31	Other
Apold1	0.27471	1.07214	15	0.38473	0.877293	-0.61058	0.797076	29	Other
Apoo	0.2226	0.0366609	15	0.54482	0.740526	1.1153	1.73599	24	Other
Aqp8	0.32228	0.22666	15	0.43652	0.0952358	0.77382	1.67062	20	Other
Arhgap10	0.22817	0.159066	15	-0.28496	2.00482	-1.2327	1.30801	19	Other
Arhgap24	0.28302	0.730744	15	0.45857	0.830179	0.6837	1.45703	24	Other
Arih1	-1.047	14.949	15	-1.102	2.47175	2.4433	3.06618	32	Other
Arnt	0.034031	0.678733	15	0.20687	0.224513	2.5278	4.36187	33	Other
Arsj	0.038946	0.0651482	15	0.25725	0.892722	-0.36828	1.58862	20	Other
Atf6	0.080993	0.0154322	15	0.33042	0.539884	-0.18701	0.485904	37	Other
Atm	-0.86052	10.5695	15	-0.76636	4.92318	0.75354	0.999132	26	Other
Atp2b1	-2.9728	26.2049	15	-2.0212	6.38362	-7.3372	8.00364	24	Essential
Atp5d	-0.88512	10.6751	15	-0.52418	3.6195	-5.1947	4.83594	24	Other
Atp5k	-0.54386	5.17565	15	-0.23773	1.36397	-4.3457	4.84915	29	Other
Atp5o	-0.31869	0.296717	15	-0.13758	1.46038	-5.8021	7.34127	26	Other
Atp6ap1	-0.54727	6.11375	15	0.40544	0.105939	-2.3985	2.18284	20	Other
Atp6v1c2	0.18749	0.547585	15	0.18733	0.117191	1.4462	2.66819	34	Other
Atp6v1e1	-2.3661	11.9737	15	-0.45087	1.29132	0.4839	1.71377	24	Other
Atp6v1g3	0.31421	0.907279	15	0.18014	0.641551	0.8335	1.61018	46	Other
Aurka	-4.0197	22.9548	15	-2.1497	9.85902	-5.6243	4.65092	17	Essential
B3gat3	-0.75975	10.5943	15	-0.59709	1.38236	-0.49733	0.748192	22	Other
B3gnt6	-0.10545	0.577197	15	-0.24213	1.10483	-0.24577	1.28693	31	Other
Baiap2l1	-0.0092288	0.321372	15	0.023199	0.311091	-0.23574	0.91682	22	Other
Baz2b	0.046912	0.0529144	15	-0.38703	1.41849	-0.23199	2.06443	24	Other
Bbs9	0.17133	0.058578	15	0.41132	0.184011	-1.0672	0.955186	22	Other
Bcl2	0.14558	0.2467	15	-0.051959	0.578775	-0.26785	0.428606	34	Other
Bcl2l1	0.29889	1.03496	15	0.26411	1.47748	-1.3314	2.82807	33	Other
Bco2	0.38828	1.2418	15	0.24091	0.286442	0.44239	0.855987	24	Other
Bdnf	0.27833	0.0889223	15	-0.023089	1.05712	0.28141	1.81861	10	None-Essential
Bhmt2	0.077035	0.0980733	15	0.76692	0.193827	0.79815	1.03068	24	Other
Bid	0.3749	0.750606	15	0.10033	0.599376	1.1106	1.62676	31	Other
Birc6	-0.79697	5.77055	15	-1.1253	5.25259	-4.7105	10.6633	38	Other
Bmp10	0.10465	0.553261	15	0.36487	0.295146	0.65031	1.14203	31	Other
Bpifa1	0.24309	1.16055	15	0.15385	1.32082	0.52371	1.68912	23	Other
Brd1	-0.45347	2.42134	15	-0.44494	2.63774	-1.2815	1.98126	20	Other
Brd2	-1.5286	9.12454	15	-0.47989	2.41105	-2.3508	1.20652	14	Other
Bre	0.023417	1.21193	15	-0.1133	0.564522	-0.42811	0.850627	24	Other
Brinp1	0.17917	0.213675	15	0.072795	0.915138	0.52187	0.862551	28	Other
Bst1	0.073128	0.855706	15	0.20486	0.624501	0.25557	1.00995	23	Other
Btk	0.21534	1.02433	15	-0.13727	1.32218	0.82365	0.936104	14	Other
C1ql2	0.0045337	0.0438364	15	0.30594	0.256428	-0.81424	0.770241	17	Other
C8b	-0.12856	0.755401	15	-0.27644	1.82391	-0.59127	0.664863	15	Other
Cacng3	0.20808	0.242293	15	0.20302	0.284933	-0.4722	0.812479	23	Other
Carm1	-0.5347	2.67983	15	-0.93033	6.01956	-0.25937	0.334738	29	Other
Cars2	-0.25843	0.490166	15	-0.60516	3.31758	-1.7008	2.38406	24	Other
Cat	0.22942	0.47515	15	0.37835	0.261307	0.014263	0.707943	22	Other
Cbr3	0.22198	1.26018	15	0.44823	0.117561	0.46534	1.42387	21	Other
Ccin	0.0010735	0.363332	15	0.14278	1.03355	-0.2647	1.05797	14	Other
Cckar	0.19708	0.29738	15	0.21851	0.328586	0.25221	0.267036	26	Other
Ccl1	0.054058	0.274007	15	-0.23542	0.942068	-0.32291	0.555331	37	Other
Cd99l2	0.41367	0.138794	15	0.068103	0.559044	1.5302	2.70014	22	Other
Cdcp2	0.00065256	0.235585	15	-0.11459	0.761427	0.81149	1.14832	28	Other
Cdk5r2	0.12752	2.96273	15	0.052235	1.09264	-2.5241	2.79081	24	Other
Cdkn1a	0.4435	4.90633	15	2.5335	4.91314	4.7802	9.67996	35	Other
Cela3b	0.3518	1.39185	15	0.47181	0.512989	0.92745	1.87739	41	Other
Chat	0.36929	0.672907	15	0.30869	0.111411	-0.60139	1.35997	29	Other
Chmp3	-0.65333	3.24354	15	-0.34125	1.27662	-4.7897	1.68137	15	Other
Chrm4	0.14625	0.519246	15	-0.32432	1.56889	-0.24776	0.178958	22	Other
Cklf	-0.20243	0.29169	15	0.0093312	1.16755	-6.5744	3.47633	18	Other
Cks1b	-0.57741	2.4755	15	-0.74452	3.05756	-0.6332	0.757111	24	Other
Clca1	0.26642	0.931332	15	0.35186	0.93968	0.26261	0.885222	36	Other
Clec2d	0.33921	0.437671	15	0.35941	1.55258	-1.1442	1.60929	18	Other
Clec4a2	0.026841	0.621021	15	0.058965	0.29902	-0.32005	1.03636	42	Other
Clk3	0.36916	0.505525	15	-0.27376	1.5461	0.34011	0.748362	26	Other
Clrn1	0.36992	0.740526	15	0.3888	0.115715	0.33843	0.690604	20	Other
Cmpk1	-0.95728	4.1758	15	-0.46015	2.00133	-3.4156	2.37417	20	Other
Cndp2	0.22361	0.139237	15	0.11763	0.190939	-0.58001	0.581119	13	Other
Cnot8	-0.21633	0.383966	15	-1.467	7.96043	-2.0643	1.82042	22	Other
Col20a1	0.20427	0.401144	15	0.14709	0.333772	-0.068749	2.093	45	Other
Commd3	-0.31783	0.234138	15	-0.75984	5.64631	0.13389	2.31692	32	Other
Coq7	0.35974	0.849673	15	0.56694	0.586432	0.84914	3.01532	33	Other
Coq9	0.1496	0.760976	15	0.44785	0.451672	0.10315	0.24809	28	Other
Cox10	0.15037	0.486463	15	0.092138	0.564936	0.098589	1.31027	24	Other
Cox4i1	0.084932	0.0662597	15	0.16363	0.370927	-1.7089	1.92405	38	Other
Cox4i2	0.33183	0.626904	15	0.36639	1.1321	0.79583	1.30841	35	Other
Cox5a	0.13074	0.125675	15	-0.21437	1.25233	-0.24558	1.31044	35	Other
Cox5b	-0.013285	0.167102	15	-0.095681	0.849213	-0.4153	0.74	28	Other
Cox6a1	-0.12799	0.200212	15	0.090793	0.668573	-1.3612	1.70843	52	Other
Cox6a2	0.14753	0.365986	15	0.47559	0.907279	-0.00070949	0.209096	35	Other
Cox7c	-0.58868	4.21649	15	-0.5684	2.03289	-0.92892	1.51968	22	Other
Cpt2	0.30957	0.267068	15	0.21562	0.0827887	0.74818	1.66627	33	Other
Cptp	0.056575	0.332146	15	-0.075786	0.575657	-1.0019	1.4881	16	None-Essential
Crebbp	0.40819	5.01701	15	0.22129	0.384239	6.0603	7.47882	40	Other
Cs	0.16048	0.677243	15	0.30183	1.11222	-0.417	0.520367	29	Other
Cst10	0.31614	1.5461	15	0.33859	0.183394	0.86024	1.96405	23	Other
Cst11	0.31998	0.488785	15	0.30741	0.237404	0.15805	0.765685	28	Other
Cstl1	0.17057	0.667844	15	-0.21764	0.761502	-0.48964	1.37664	15	Other
Ctsw	-0.012209	0.22455	15	-0.30533	1.49839	0.10052	0.762783	29	Other
Cyb5r4	-0.2782	0.620658	15	-0.53997	5.02394	-3.8933	3.66296	22	Other
Cyc1	-0.28511	1.20734	15	-0.29457	1.40578	-0.018387	1.91775	25	Other
Cycs	-1.8336	8.79967	15	-0.49427	2.63946	-4.2145	4.27001	26	Other
Cyp11b1	0.38191	1.3668	15	0.24777	0.931332	0.50246	0.914852	26	None-Essential
Dach1	0.30107	1.3176	15	-0.25827	1.18384	-0.64121	1.17184	22	Other
Dapk1	-0.033248	1.19113	15	0.038604	0.486024	0.093093	0.341311	34	Other
Daxx	-0.49216	2.36204	15	-0.23329	2.31381	-0.79205	0.919698	28	Other
Ddx4	-0.15074	0.311091	15	0.21738	0.524155	-0.67546	2.27282	32	Other
Defa2	-0.32282	0.455634	15	0.33493	0.472938	-0.66476	0.929593	50	Other
Dgat1	0.052862	0.108635	15	0.033132	0.698427	0.19693	0.838063	27	Other
Dgkd	0.088023	1.62291	15	0.28412	0.217398	0.17014	0.477113	23	Other
Dguok	0.12244	0.202269	15	0.3589	0.799752	0.057019	0.433716	28	Other
Dhtkd1	0.12017	0.105834	15	0.019523	0.35638	0.12152	0.679169	24	Other
Dlat	0.29062	0.291843	15	0.065126	1.41849	0.032469	0.950394	23	Other
Dld	-0.77991	5.60655	15	-0.92755	4.21213	-0.17604	0.822031	16	Other
Dlst	-0.53701	3.24406	15	-0.91569	4.5119	-2.8757	3.31949	29	Other
Dmp1	0.28633	0.592847	15	0.32685	0.788239	0.38703	0.824691	32	Other
Dnah7b	-0.2188	1.45806	15	-0.3902	0.894831	-0.68912	1.70167	36	Other
Dnajb4	0.05181	0.169816	15	0.079831	0.688925	-0.89933	1.10727	16	Other
Dpp4	-0.10608	0.139926	15	0.48315	2.13249	-1.0353	1.40619	24	Other
Dsg4	0.21578	0.177374	15	0.14202	0.0979481	-0.47126	2.03676	21	Other
Dtx2	0.21135	0.043313	15	0.1408	0.245033	-0.10836	0.621457	23	Other
Dusp4	0.18644	0.135703	15	-0.29944	1.35732	-0.94315	2.24855	28	Other
Dyrk1a	0.67826	9.9523	15	3.6369	11.2706	6.3522	14.0255	57	Other
E2f1	-0.023354	0.0550783	15	-0.40309	1.39657	-1.2885	2.19997	26	Other
Egf	0.36191	0.556143	15	-0.033398	0.531136	0.64439	0.96437	26	Other
Egr1	-0.22809	1.96377	15	-1.251	2.68931	0.52838	0.453297	22	Other
Ehmt2	-0.57529	3.98338	15	-0.17669	0.802913	-2.0634	2.36067	23	Other
Ep300	0.72396	9.85387	15	-0.83429	2.39899	-2.2037	2.04672	15	Other
Ept1	-0.69234	6.05094	15	-0.13813	0.989234	-0.14564	1.49	30	Other
Extl1	-0.065694	0.183368	15	0.21315	0.815223	0.20725	0.524503	26	Other
Fbxl5	-0.057475	0.289223	15	-0.23035	0.697344	-0.28269	0.80827	21	Other
Fbxo28	0.19971	0.151466	15	-0.021948	1.11859	0.55253	2.21765	25	Other
Fbxo5	-1.4063	7.11744	15	-0.48732	1.66268	0.58394	1.60599	13	Other
Fdps	-0.52287	6.0551	15	-0.43018	2.40439	-0.854	1.1281	30	Other
Fem1c	-0.074165	0.0756742	15	0.12741	2.05868	0.25507	1.11526	25	Other
Ffar1	0.039458	0.0314984	15	0.076773	0.224215	0.56258	1.05713	34	Other
Fgd4	0.18887	0.305368	15	0.26191	0.702853	-0.11304	1.19122	25	Other
Fgf6	0.39881	0.694026	15	0.52271	0.645315	1.2966	2.60286	29	Other
Fnbp1l	0.17848	1.07726	15	-0.44343	1.9155	1.2689	0.991528	24	Other
Fndc7	0.25134	0.83657	15	0.22164	0.884656	1.2772	2.50027	30	Other
Fpr3	0.1582	1.58873	15	-0.44446	1.75503	-0.056258	0.589729	18	Other
Fxn	-2.6952	15.0877	15	-1.9838	7.656	-3.0528	2.34469	18	Other
Gabra6	0.16402	0.0288727	15	0.41943	0.459996	-2.8406	1.44127	16	Other
Gabrr2	0.034612	0.220072	15	-0.32664	1.03355	2.172	1.86119	25	Other
Galnt4	-0.0070219	0.0542607	15	-0.019699	0.658684	0.28484	1.47645	29	Other
Gamt	0.27387	0.0946413	15	0.24835	0.51807	0.078843	1.2136	36	Other
Gbp7	0.36781	0.755748	15	0.18752	0.341779	0.47835	0.808018	33	Other
Gdf2	-0.11582	0.175477	15	0.17115	0.43531	-0.12302	0.855893	18	Other
Gdf3	0.090508	0.911828	15	0.5863	0.767894	-0.44928	1.43152	28	Other
Gfm1	-0.49405	2.52808	15	-0.69015	3.81395	-1.8145	2.69618	19	Other
Gfra4	0.26732	0.61631	15	0.30901	0.424997	0.11755	0.599134	47	Other
Ggct	0.37524	1.27942	15	0.31189	0.500382	0.7594	1.77786	25	Other
Ghsr	0.12371	0.467373	15	-0.33369	2.14166	-1.3361	1.30955	25	Other
Gja10	-0.024506	0.604691	15	-0.79424	2.13756	1.3395	0.866621	17	Other
Gli2	0.14327	0.95183	15	0.45976	0.856423	0.1948	1.50199	31	Other
Glt6d1	0.26367	0.340426	15	-0.14649	0.820764	0.20342	0.962016	23	Other
Gm10053	-0.65423	4.2481	15	-0.44316	1.73898	-3.7812	6.44485	42	Other
Gm10104	-0.89914	4.36898	15	-0.90567	3.68064	-2.282	1.43249	22	Other
Gm15308	-0.3839	0.622748	15	-0.042041	0.741914	-0.56463	0.859838	51	Other
Gm20521	-2.3441	10.9409	15	-1.9968	5.09	-0.8609	3.42411	24	Other
Gmppb	-1.9954	15.652	15	-1.0922	5.91357	-3.6599	3.60303	22	Other
Gnai2	0.12312	0.148552	15	-0.42467	1.69592	-0.077222	0.545765	25	Other
Golga2	0.066298	0.0738222	15	0.36161	0.716518	0.45231	0.8175	32	Other
Gpnmb	0.15563	0.621493	15	0.012482	1.53997	-0.18661	0.499983	21	Other
Gpr108	-0.0053364	0.56583	15	-0.29805	0.630172	-0.47252	0.811634	18	Other
Gpr152	0.13162	0.0825313	15	0.26669	0.140591	0.40978	0.525551	35	Other
Gprc6a	0.23952	0.185872	15	0.096341	0.664783	-0.026286	1.58132	34	Other
Gpx3	-0.074849	0.958647	15	0.47308	0.979722	0.56258	0.707855	33	Other
Gpx5	0.13424	0.218906	15	0.34263	0.68971	0.66131	1.31053	43	Other
Greb1	0.11134	0.295146	15	0.23943	0.755748	0.94409	1.84857	28	Other
Grm5	0.29652	0.376668	15	0.92642	1.72972	0.67192	1.32121	25	Other
Grm6	0.23445	0.721201	15	0.19124	0.244079	-0.2125	0.744631	18	Other
Habp2	0.17718	0.634156	15	0.34148	1.3668	0.48434	0.543664	25	Other
Hacd2	-0.28217	0.103749	15	0.11271	0.495842	0.26559	0.886391	38	Other
Hao1	0.33718	0.652982	15	0.23403	0.373567	0.38946	0.905878	26	Other
Hdac3	-1.788	14.2406	15	-0.79259	2.98885	-3.8899	4.21289	32	Other
Hemt1	-0.43384	2.12429	15	0.27045	0.472938	0.28404	0.96015	25	Other
Hey2	0.041843	0.166158	15	0.055833	0.898975	0.64814	0.832594	13	Other
Hist1h4k	-0.31738	0.342724	15	-0.13095	1.95005	-0.80093	1.44573	18	Other
Hmces	-0.59875	4.04933	15	-0.081175	0.965933	-1.0694	1.46257	36	Other
Hrg	0.21629	0.177146	15	0.20981	1.04589	1.9052	3.12719	28	Other
Hrh3	0.27622	0.370509	15	-0.10402	0.46586	-0.56125	1.37313	30	Other
Hsp90ab1	-2.0319	10.7597	15	1.2331	1.67586	-0.42312	1.69713	20	Other
Hspa5	-5.8381	29.6144	15	-3.5433	18.3205	-6.1596	8.36102	25	Essential
Htr5a	-0.013148	0.253872	15	-0.26474	1.77019	-0.377	0.906088	39	Other
Ibtk	0.003143	0.792662	15	0.60076	1.28073	-0.28264	1.34369	17	Other
Idh1	0.2275	0.406326	15	-0.024669	0.380865	0.10593	0.799697	34	Other
Idh2	0.45084	1.1321	15	0.34585	0.54479	1.4367	2.84964	30	Other
Idh3a	0.18182	0.196843	15	-0.16563	0.565735	-0.38456	1.80457	33	Other
Idh3b	0.027414	0.484166	15	0.23435	1.05771	0.32288	0.54097	25	Other
Idh3g	0.2597	0.150974	15	0.18371	1.03496	-0.17525	1.94958	40	Other
Ifna2	-0.26375	1.23337	15	-0.38816	1.40467	-1.7151	2.42695	20	Other
Ifnar2	1.1487	25.9825	15	0.56207	0.849673	-0.21092	1.28992	39	Other
Igkv15-103	0.19064	1.02225	15	0.66157	0.41679	0.91492	2.00835	19	Other
Iglon5	0.18152	0.207875	15	0.33519	0.141048	0.098809	0.841607	29	Other
Igsf8	0.02044	0.596091	15	-0.16901	0.825504	-0.93712	0.772011	16	Other
Ikbkb	0.18213	0.144741	15	0.52173	0.539252	-0.97174	1.91119	42	Other
Il17f	0.20223	0.599376	15	0.27823	0.351464	0.31954	1.55031	49	Other
Il18rap	0.26561	0.275012	15	-0.18306	1.30766	0.77888	1.69456	24	Other
Il1f10	0.19712	0.0199512	15	-0.12759	0.636877	1.0429	3.91225	44	Other
Il21	0.50595	0.580143	15	0.25074	0.570926	1.3476	2.51946	26	Other
Il25	0.30827	0.668816	15	0.2433	0.766268	0.86715	1.27051	29	Other
Il6ra	-0.068187	0.440046	15	0.45517	0.139926	0.54062	0.860751	23	Other
Ilk	-2.0356	14.2794	15	-0.60236	1.79062	-3.7905	5.63158	35	Other
Ilvbl	0.038171	0.334344	15	-0.23067	1.02379	-0.59123	0.549874	15	Other
Inhbc	-0.027055	0.205003	15	-0.32206	1.29486	0.11	0.945464	22	Other
Inppl1	0.65104	7.12456	15	1.2567	0.255324	5.2333	8.82243	32	Other
Insrr	0.11487	0.0245498	15	0.29683	0.139237	-0.11145	1.07116	25	Other
Itga2b	0.0036049	0.151959	15	0.12134	1.00388	0.44923	1.7932	28	Other
Itpripl2	0.062383	0.0743682	15	0.009652	0.372419	-0.28054	1.05498	18	Other
Ivns1abp	-0.018261	0.246432	15	0.11009	0.846338	-0.92249	1.19118	19	Other
Kazn	0.24059	0.745524	15	0.086802	0.528664	1.3109	1.81485	37	Other
Kcnb2	-0.18161	0.144463	15	0.55558	0.119461	-1.6244	1.57328	17	Other
Kcnk10	0.40039	0.449625	15	0.29777	0.580143	-0.072617	1.08311	33	Other
Kcnk16	0.099098	0.00396141	15	0.26748	0.368993	0.44522	0.822233	22	Other
Kcns2	-0.014921	0.303609	15	-0.5619	1.10191	-0.73213	1.62013	24	Other
Kctd5	0.32387	3.02057	15	-0.16552	1.45806	5.3836	8.99371	41	Other
Kctd8	0.012317	0.432679	15	-0.44654	1.34287	0.6623	1.17099	21	Other
Klhl22	0.17684	0.345881	15	0.32768	0.163834	1.074	4.42372	39	Other
Klk11	0.1546	0.481881	15	0.27594	0.553261	0.87766	3.57963	36	Other
Klk12	0.16997	0.0499079	15	0.14821	0.104942	0.25442	0.660231	32	Other
Krt2	-0.016281	0.130545	15	-0.23934	1.34033	-1.4311	1.6718	25	Other
Lamtor4	-0.16552	0.131838	15	0.25382	1.47748	-1.362	2.58762	30	Other
Lars2	-0.15359	0.489334	15	0.19928	0.589628	-2.6304	2.98737	19	Other
Lct	0.44524	0.31608	15	0.28081	0.788239	0.43554	0.908368	31	Other
Lemd2	-1.2809	9.00665	15	-0.40545	2.07884	-0.89749	1.60981	24	Other
Leprotl1	0.073529	0.00585889	15	0.057173	0.292464	1.9069	3.24264	28	Other
Lgals3bp	0.34516	0.238095	15	0.18195	0.656867	0.49504	2.04019	20	Other
Lgi4	-0.13338	0.523226	15	0.042783	0.652982	0.9256	2.81562	36	Other
Lim2	-0.015087	0.384945	15	0.5862	0.825126	-0.16531	0.596125	19	Other
Lonp1	-2.5834	18.6551	15	-1.8193	8.85214	-4.8575	3.09783	18	Other
Loxl1	0.057025	0.0832093	15	-0.1559	0.499352	-0.009653	0.53377	19	Other
Lsamp	0.086805	0.286896	15	0.37054	0.456031	-0.99588	1.43193	29	Other
Lyg1	-0.0082606	0.411448	15	0.20386	0.800163	-1.392	1.62923	22	Other
Lyzl1	0.23015	0.0525908	15	0.38977	1.58511	0.20402	1.28522	22	Other
Manea	0.15707	0.146624	15	0.15341	0.158028	-0.13982	0.99805	21	Other
Map1lc3b	-0.10563	0.42583	15	-0.13838	1.76607	0.81188	2.166	18	Other
Map2	-0.099779	0.268976	15	-0.2228	1.44739	-0.58994	1.05465	28	Other
Map4k3	0.17915	0.515828	15	-0.41454	1.19874	0.40325	0.503596	22	Other
Mapk1	-1.1471	17.2112	15	4.8708	14.3065	6.3353	13.2987	61	Other
Mbl2	0.22536	0.122122	15	-0.10352	0.650353	0.42247	1.03902	29	Other
Mc1r	0.41751	0.361541	15	0.10458	0.626904	1.1052	2.65376	32	Other
Mc2r	0.23001	0.725935	15	0.21542	0.350052	0.56428	0.9592	19	None-Essential
Mc5r	0.40868	0.606056	15	0.32669	0.13142	0.38461	1.10791	30	Other
Mcoln2	0.023795	0.0658148	15	-0.41928	1.15442	0.077257	1.00527	30	Other
Mdh1	0.33427	1.09286	15	0.38945	0.542012	1.4935	2.40617	31	Other
Mdh1b	0.32781	0.313659	15	0.52217	0.811606	1.0862	1.59695	26	Other
Mdh2	0.54788	1.17556	15	0.24439	0.468559	0.48171	0.877162	32	Other
Mep1a	0.20144	0.766268	15	0.30062	0.389446	0.50907	1.01009	29	Other
Mettl14	-1.5063	5.99311	15	0.63922	1.20734	-0.49342	1.70485	33	Other
Mgat1	-0.91389	5.29919	15	-0.43639	4.60312	-2.0679	5.13678	28	Other
Mmp20	0.28998	0.702853	15	0.19603	0.659377	0.67912	0.836719	24	Other
Mmp21	0.41821	0.477373	15	0.11835	1.34317	0.3123	1.02098	45	Other
Mov10	-0.15986	0.917969	15	-0.1287	1.19438	-1.1656	1.64969	30	Other
Mpp4	0.25748	0.422474	15	-0.12639	0.959675	0.45221	0.763538	34	None-Essential
Mrpl44	-0.31492	1.59441	15	-0.25123	1.70981	-1.8486	1.60699	16	Other
Ms4a10	0.26131	0.116821	15	0.15218	0.408079	-0.1245	0.343586	25	Other
mt-Co1	0.24545	0.220432	15	0.27143	0.302779	0.073048	1.3897	18	Other
mt-Co1	0.24545	0.220432	15	0.40601	0.466393	0.073048	1.3897	18	Other
mt-Co1	0.24545	0.220432	15	0.27143	0.302779	1.5871	2.41901	28	Other
mt-Co1	0.24545	0.220432	15	0.40601	0.466393	1.5871	2.41901	28	Other
mt-Co1	0.19888	0.203141	15	0.27143	0.302779	0.073048	1.3897	18	Other
mt-Co1	0.19888	0.203141	15	0.40601	0.466393	0.073048	1.3897	18	Other
mt-Co1	0.19888	0.203141	15	0.27143	0.302779	1.5871	2.41901	28	Other
mt-Co1	0.19888	0.203141	15	0.40601	0.466393	1.5871	2.41901	28	Other
mt-Co3	0.34448	0.856423	15	0.18374	0.721201	1.4691	1.63543	19	Other
mt-Cytb	0.50028	1.51041	15	0.03179	0.422474	0.29375	1.65445	35	Other
mt-Nd1	0.40593	0.82388	15	0.22542	0.432644	1.1402	2.34521	21	Other
mt-Nd2	0.40143	0.994048	15	0.18418	0.131844	0.27578	1.24754	32	Other
mt-Nd3	0.37198	1.2996	15	-0.13045	0.943057	-0.22079	1.54301	17	Other
mt-Nd3	0.37198	1.2996	15	0.10042	1.44695	-0.22079	1.54301	17	Other
mt-Nd3	0.37198	1.2996	15	-0.13045	0.943057	0.41043	0.896881	26	Other
mt-Nd3	0.37198	1.2996	15	0.10042	1.44695	0.41043	0.896881	26	Other
mt-Nd3	0.19675	1.46912	15	-0.13045	0.943057	-0.22079	1.54301	17	Other
mt-Nd3	0.19675	1.46912	15	0.10042	1.44695	-0.22079	1.54301	17	Other
mt-Nd3	0.19675	1.46912	15	-0.13045	0.943057	0.41043	0.896881	26	Other
mt-Nd3	0.19675	1.46912	15	0.10042	1.44695	0.41043	0.896881	26	Other
mt-Nd4	0.49976	0.656867	15	0.4202	0.406326	0.89172	2.08971	30	Other
mt-Nd5	0.50074	1.32082	15	0.39691	0.182831	1.2069	2.36676	37	Other
mt-Nd6	0.37272	0.685417	15	0.93113	1.10552	1.1403	1.39689	20	Other
Mtbp	-0.92956	5.39147	15	-0.17477	1.289	-0.89835	0.816702	15	Other
Mtch2	-0.14373	0.104009	15	-0.082975	1.05851	-2.1675	1.8352	22	Other
Mtnr1b	-0.081425	0.160843	15	-0.12335	0.548597	-0.83437	1.37535	33	Other
Mybpc3	0.20472	0.285377	15	0.34584	0.536525	0.35889	1.40454	30	Other
Myt1	0.38086	0.272996	15	0.66739	0.899595	0.89178	1.52969	26	Other
Naa35	-0.46296	3.43393	15	-0.37023	1.40928	-0.63465	1.46992	14	Other
Ncan	-0.060178	0.274374	15	-0.47413	1.52551	-0.57785	1.78244	25	Other
Ndc1	-0.93348	7.20104	15	0.053521	0.271995	0.097866	1.36483	39	Other
Ndufa1	-0.74652	5.04437	15	-0.28327	2.90226	-4.9637	5.50063	32	Other
Ndufa10	-0.2578	0.0145241	15	-0.3325	1.39278	-0.6521	0.882497	21	Other
Ndufa11	-0.086454	0.228611	15	-0.43889	2.46917	-0.34387	0.816702	29	Other
Ndufa12	0.10644	0.660807	15	-0.066622	0.477543	0.41222	0.231391	28	Other
Ndufa13	-0.038711	0.0809428	15	-0.27888	1.64056	-2.8202	2.40335	32	Other
Ndufa2	-0.33391	0.934047	15	-0.24565	1.00049	0.11481	1.55823	27	Other
Ndufa3	-0.078808	0.243212	15	-0.013616	0.521621	-0.21348	0.866685	36	Other
Ndufa4	0.29213	0.805624	15	0.42291	0.270018	0.98489	1.95012	25	Other
Ndufa4l2	0.35426	1.21563	15	0.098584	0.403282	0.75156	1.41556	32	Other
Ndufa5	-0.19027	0.255551	15	0.20497	1.86341	0.20381	1.36005	28	Other
Ndufa6	-0.014832	0.443589	15	-0.085738	1.06868	-1.0889	0.948384	29	Other
Ndufa7	0.073042	0.00762324	15	0.18643	0.130358	0.93512	2.5985	39	Other
Ndufa8	-0.2813	0.89201	15	-0.43864	1.00023	-4.3345	4.09051	23	Other
Ndufa9	-0.086991	0.109573	15	0.10926	0.157509	0.37448	1.5339	29	Other
Ndufab1	-1.5458	12.9448	15	-0.41593	2.08843	-3.8219	4.5649	27	Other
Ndufaf1	-0.071066	0.0174167	15	-0.02692	0.507785	-0.90756	0.947922	30	Other
Ndufaf2	0.12525	1.01397	15	-0.32708	1.61831	0.28509	1.54092	31	Other
Ndufaf6	0.12535	0.843057	15	0.20324	2.42564	-0.59834	1.53766	34	Other
Ndufb1-ps	0.17662	0.24582	15	0.14459	0.179923	-0.50861	1.1096	43	Other
Ndufb10	-0.45998	2.41926	15	-0.71567	3.57182	-2.0196	1.85137	20	Other
Ndufb11	-0.08736	0.235577	15	-0.58041	3.693	-1.4081	2.15603	31	Other
Ndufb2	-0.090646	0.0165	15	0.26356	1.03569	0.7303	1.87837	30	Other
Ndufb3	-0.2607	0.0838567	15	-0.030099	2.42564	-0.63497	1.46591	31	Other
Ndufb4	-0.37049	1.89551	15	-0.30523	1.52458	0.52729	1.6456	30	Other
Ndufb5	-0.031464	0.0573274	15	-0.22231	0.599894	1.0824	1.38992	20	Other
Ndufb6	0.036713	0.147581	15	-0.39584	1.3217	-0.78725	1.17585	26	Other
Ndufb7	-0.035855	0.0409729	15	-0.21927	0.970982	-1.1895	0.974366	16	Other
Ndufb8	-0.086986	0.223379	15	-0.2506	1.67981	-2.4342	3.98856	28	Other
Ndufb9	-0.47397	3.11494	15	-0.85096	3.69489	-0.42425	0.859712	24	Other
Ndufc1	-0.22072	0.872701	15	-0.24338	1.79137	-0.55176	0.671437	25	Other
Ndufc2	-0.17772	0.355729	15	-0.14363	1.28656	-0.51047	0.841819	30	Other
Ndufs1	-0.3414	0.820046	15	-1.008	4.22313	-1.8012	2.73095	39	Other
Ndufs2	-0.087559	0.120067	15	-0.41109	1.95888	-4.1733	4.04072	27	Other
Ndufs3	-0.26021	0.589628	15	-0.10054	0.709765	-0.74363	2.04299	35	Other
Ndufs4	0.40136	0.984431	15	0.67273	1.27942	0.794	1.60924	25	Other
Ndufs5	0.05706	0.0534053	15	-0.18287	0.547646	-2.1183	2.32905	14	Other
Ndufs6	0.02664	0.0791204	15	0.10709	0.755748	-0.20544	0.709854	14	Other
Ndufs7	-0.061962	0.122462	15	-0.43239	1.69246	-0.18262	0.805708	35	Other
Ndufs8	-0.21861	0.0652491	15	-0.32315	1.37395	0.27366	0.852231	29	Other
Ndufv1	-0.27905	0.988134	15	-0.22452	1.75178	-4.1628	4.30849	30	Other
Ndufv2	-0.044547	0.0250142	15	0.15224	0.567913	-2.1933	1.56657	19	Other
Ndufv3	0.23865	0.0937566	15	-0.065347	0.739547	0.70446	1.47267	41	Other
Ndufv3	0.23865	0.0937566	15	0.34299	0.269315	0.70446	1.47267	41	Other
Ndufv3	0.23865	0.0937566	15	-0.065347	0.739547	-0.91568	2.39003	33	Other
Ndufv3	0.23865	0.0937566	15	0.34299	0.269315	-0.91568	2.39003	33	Other
Ndufv3	-0.12513	0.221986	15	-0.065347	0.739547	0.70446	1.47267	41	Other
Ndufv3	-0.12513	0.221986	15	0.34299	0.269315	0.70446	1.47267	41	Other
Ndufv3	-0.12513	0.221986	15	-0.065347	0.739547	-0.91568	2.39003	33	Other
Ndufv3	-0.12513	0.221986	15	0.34299	0.269315	-0.91568	2.39003	33	Other
Nf2	1.7975	18.1557	15	1.0195	0.859241	4.6313	9.05821	44	Other
Nostrin	-0.10112	0.588801	15	-0.32444	0.988303	-0.26063	0.799615	21	Other
Npnt	0.30005	0.68971	15	0.20101	0.221972	0.88847	1.6905	31	Other
Npvf	0.19982	0.53383	15	0.54087	0.445584	0.30593	1.09724	26	Other
Nup210	0.087928	0.0994963	15	0.039312	0.407168	2.5014	2.94962	25	Other
Nup54	-1.7363	13.0327	15	-0.3761	1.73004	-4.6003	3.56753	23	Other
Oc90	0.068525	0.735607	15	-0.15378	0.873544	0.81615	1.54766	34	None-Essential
Ogdh	-0.99474	11.3164	15	-1.2089	5.99443	-5.581	4.66686	16	Other
Ogdhl	0.066081	0.205052	15	0.12516	0.61631	1.2234	2.48539	22	Other
Olfr1062	-0.073854	0.0973391	15	-0.17502	0.913569	0.055852	2.28957	21	Other
Olfr1094	0.51038	0.232288	15	0.28842	0.218906	0.69905	2.34905	47	Other
Olfr640	0.45382	0.29851	15	0.3143	0.275012	0.69513	1.22273	28	Other
Olfr70	0.050786	0.424339	15	-0.096308	0.664984	0.64388	1.32102	29	Other
Opa1	-0.70681	4.82606	15	-0.2188	1.2717	-1.5299	1.74817	25	Other
Opn5	0.044977	0.619807	15	0.093899	0.281274	2.0143	2.93817	28	Other
Ostc	-0.71272	3.08703	15	-0.2377	4.83899	-1.3404	2.37982	26	Other
Otop1	-0.042645	0.436341	15	0.27232	0.42517	0.089783	1.54403	30	Other
Otor	0.33074	0.210032	15	0.37072	0.35717	1.1076	2.71236	32	Other
Ovch2	0.25487	0.707345	15	0.25748	1.11859	2.2382	2.21171	18	Other
Oxa1l	-2.7299	18.9477	15	-1.0227	3.98898	-3.7201	2.80699	19	Other
P2ry14	0.09459	0.39794	15	0.34194	0.379479	-1.0351	2.00591	16	Other
P4htm	0.089177	0.559044	15	-0.22688	1.16736	0.19791	0.733345	22	Other
Pank2	0.31432	1.41849	15	0.47773	0.923141	1.0967	1.83404	32	Other
Pard6g	0.083198	0.0364955	15	0.1126	0.661683	0.49956	1.2935	24	Other
Park7	0.41601	1.08059	15	0.38047	0.730744	1.0664	2.15131	29	Other
Parp9	0.16929	0.797321	15	0.10813	0.367806	-0.93394	1.623	32	Other
Pcdhb13	0.22161	0.244949	15	0.4872	0.234756	0.82909	1.53666	24	Other
Pcgf3	-0.039772	0.167977	15	0.39208	1.15018	-0.94671	1.2607	23	Other
Pdha1	0.09285	0.161693	15	0.4917	0.113182	0.53562	1.0749	20	Other
Pdha2	0.1805	0.209307	15	0.13011	0.274007	0.075135	0.654332	31	Other
Pdhb	-0.15465	0.107154	15	0.10564	0.26417	-0.17412	1.43126	24	Other
Pdyn	0.025837	0.155467	15	0.29865	1.06868	-0.00020599	1.10545	32	Other
Pfkfb3	-0.088783	0.0840675	15	0.24431	0.594619	-0.85051	0.910483	18	Other
Phf23	-0.68642	4.17824	15	-0.8862	4.69205	-4.2162	4.52208	26	Other
Phip	-0.089242	0.0278157	15	-0.15116	1.48004	-0.23684	1.30539	21	Other
Phlpp2	0.033459	0.625197	15	-0.29013	2.37872	-0.71348	1.29919	28	Other
Piezo1	0.045584	0.30116	15	0.31109	1.36245	-1.8727	2.79285	29	Other
Pigq	0.041219	0.31126	15	0.15719	0.94823	-0.042924	0.109495	28	None-Essential
Pigr	0.091014	0.233929	15	0.011386	0.35928	0.075291	1.02736	40	Other
Pink1	0.1955	0.803907	15	0.54829	0.525842	0.42197	1.3828	41	Other
Pkn2	-1.3067	11.0856	15	0.37088	0.260364	-1.3713	1.68535	20	Other
Pla2g4e	0.10131	0.462105	15	0.24893	1.53808	0.28824	0.39048	41	None-Essential
Pla2g7	0.21164	0.156998	15	0.27439	0.668816	0.17933	0.656769	22	Other
Pnpla5	0.28933	1.11859	15	0.40059	0.672559	0.32388	0.513541	32	Other
Pola1	-4.3597	23.5738	15	-2.3708	8.45701	-6.0846	7.67942	20	Essential
Pole2	-3.0277	19.2961	15	-0.93208	5.00034	-5.5364	7.85518	19	Essential
Ppp6r3	0.20553	0.870278	15	0.11904	1.03496	-2.6164	1.45324	18	Other
Prdm9	0.032036	0.600672	15	-0.35932	1.31146	-0.5674	1.08494	30	Other
Prickle2	0.091112	0.351581	15	-0.32008	0.946192	0.16763	2.61771	17	Other
Prickle4	-0.08375	0.569586	15	-0.21613	0.774846	-1.115	1.43737	23	Other
Primpol	0.19849	0.416994	15	0.1617	0.376668	0.55304	1.51741	25	Other
Prkar1a	-0.91576	6.6542	15	-0.66575	3.09656	-3.0577	2.80549	28	Other
Prlh	-0.011084	1.00868	15	0.011757	0.431963	0.42188	0.79915	25	Other
Prlhr	0.2938	0.54479	15	0.16216	0.909354	0.95253	1.73532	29	Other
Prss33	0.45042	0.536525	15	0.4741	1.19113	0.14791	0.935767	32	Other
Prss58	0.030028	0.250202	15	-0.081156	0.818957	-0.57627	2.07922	22	Other
Psd3	0.27975	0.899595	15	0.09001	1.00388	-0.094312	1.02721	24	Other
Psma1	-3.6237	16.1062	15	-1.375	6.0077	-5.4611	3.40566	25	Essential
Psmb3	-3.6973	16.0437	15	-1.7562	7.8657	-6.9543	10.0929	22	Essential
Pstk	-1.061	5.79242	15	-0.061052	1.42208	0.38383	1.6648	21	Other
Ptar1	-1.5022	13.1218	15	-0.37677	2.03666	-0.78932	1.24677	17	Other
Ptges	0.1623	0.451672	15	0.053458	0.435725	0.65792	1.45685	38	Other
Ptgs2	0.40824	0.965933	15	0.20077	0.368039	0.57872	1.16244	32	Other
Ptpn23	-0.52854	2.66368	15	-0.45225	3.40748	-5.0279	5.1757	24	Other
Ptprb	0.16817	0.354745	15	0.45228	1.0791	-0.082798	0.437969	18	Other
Rab11fip4	0.18683	0.14242	15	0.0084313	0.576967	0.72064	1.23371	22	Other
Rab31	0.3784	1.44695	15	0.16105	0.0704074	0.058953	1.26405	29	None-Essential
Ranbp10	0.099307	1.95005	15	0.20136	0.296262	0.55672	0.937907	27	Other
Rasd1	0.22026	1.34317	15	0.14849	0.849673	0.60779	1.22584	21	Other
Rasd2	0.073216	0.127284	15	0.17393	0.140141	-0.10937	1.27544	35	Other
Rasip1	0.33133	0.923141	15	0.42417	0.82388	2.1126	2.66772	24	Other
Rbp3	0.19704	0.162222	15	0.16997	0.321108	0.14738	0.516327	31	Other
Rexo4	-0.15427	0.289637	15	0.07277	1.17361	0.36367	2.02543	39	Other
Rgl2	-0.17128	0.128567	15	-0.3507	0.844846	-0.66133	2.12793	22	Other
Rgs19	0.20888	0.892044	15	0.034726	1.01397	0.95547	1.42203	26	Other
Rilp	-0.0046308	0.170445	15	0.23687	1.08275	0.51135	1.18477	38	Other
Rnd1	0.27981	2.09664	15	-0.041538	0.833244	1.2316	2.83571	35	Other
Rnd2	0.26248	0.0650473	15	0.090063	0.32603	0.15856	1.41799	28	Other
Rnf112	-0.048026	0.784151	15	-0.25683	0.931554	-0.66187	0.858644	26	Other
Rnf7	0.13696	0.397973	15	0.87918	0.771625	-1.9099	1.38243	26	Other
Rp1	0.31648	1.22421	15	0.0091623	0.909425	1.1553	2.68146	37	Other
Rpl9-ps1	0.17722	3.57143	15	0.013831	1.7234	0.57228	1.23606	31	Other
Rtp1	0.20648	0.771625	15	0.16643	0.863279	0.30966	3.11084	23	Other
Rxfp2	-0.10123	0.581036	15	0.29499	1.15018	-0.80136	2.25571	20	Other
Rxfp3	0.0035803	1.50755	15	0.021207	0.903194	-0.82807	0.934346	24	Other
Sbpl	-0.58535	2.94646	15	-0.57902	2.80253	-0.49951	1.74569	28	None-Essential
Sdha	0.17503	0.104616	15	-0.18372	1.87445	-0.4177	1.15639	26	Other
Sdhb	0.22909	0.203655	15	-0.18313	0.908861	-0.23466	0.913818	34	Other
Sdhc	0.33106	0.975063	15	0.17936	1.67338	-0.049924	0.760851	38	Other
Sdhd	0.25488	0.126476	15	-0.2089	1.72377	-0.30847	0.496237	37	Other
Sdr16c6	0.29894	0.664783	15	0.41264	0.266097	1.8963	2.97947	24	Other
Sephs1	-0.85832	9.1266	15	-0.37179	2.24414	0.81426	2.2329	24	Other
Siglec1	0.096689	1.48963	15	0.013634	0.900907	0.10841	0.514066	24	Other
Siglece	-0.18387	1.04674	15	-0.06068	0.505525	0.12924	0.730721	30	None-Essential
Sirt3	0.42381	0.956992	15	0.50931	1.79137	0.42615	1.01426	28	Other
Slc10a2	0.24498	0.238937	15	0.28151	0.811606	0.2315	0.907911	34	Other
Slc13a1	0.12118	0.148057	15	0.53216	2.90226	0.67332	1.58264	33	Other
Slc25a26	-0.52541	2.53288	15	-0.17719	1.84448	-3.4102	2.84415	32	Other
Slc25a38	-0.074061	0.106888	15	0.039944	0.805624	0.75663	1.28244	31	Other
Slc2a2	0.2251	0.637838	15	-0.066392	0.644874	0.78828	1.4633	32	Other
Slc35a2	-0.24542	0.142239	15	-0.39675	1.70584	-1.5096	2.74829	27	Other
Slc35b1	-1.0486	5.43168	15	0.022211	0.469455	-1.3036	2.28876	23	Other
Slc51b	0.045691	1.5613	15	-0.40491	1.38057	-0.56698	1.58983	20	Other
Slc6a5	0.096357	0.105274	15	0.36495	1.39185	-0.080829	0.21249	32	Other
Smek1	-0.13833	0.10849	15	-0.23104	1.38346	-0.24905	0.974571	22	Other
Snca	0.16545	1.04589	15	0.52044	0.0923092	1.1791	2.03639	23	Other
Snrpa	-0.29805	3.65724	15	0.076411	0.975637	-1.1138	1.21122	26	Other
Snx19	0.12843	0.0413549	15	0.11123	0.871924	0.17467	1.04801	24	Other
Sp140	0.013935	5.3654	15	-0.11708	2.08632	1.2119	3.20203	32	Other
Spcs2	-1.5021	7.23306	15	-0.090772	0.607884	0.12174	0.431845	17	Other
Src	-0.48574	4.59867	15	-0.79981	1.78982	0.12909	1.12901	23	Other
Stard13	0.28413	0.847589	15	-0.40795	0.535585	5.3334	2.03613	21	None-Essential
Stk11	-1.4073	9.41744	15	-0.49844	1.89066	-4.8529	2.08103	14	Other
Stk40	-0.10938	0.250411	15	-0.38655	3.98531	-3.7522	4.15155	42	Other
Stoml2	-0.18405	0.105307	15	0.43381	0.185246	-0.032102	1.65691	29	Other
Sucla2	0.3076	0.411605	15	0.33092	1.34317	0.2107	0.767716	26	Other
Suclg1	0.14995	0.202961	15	0.82873	1.16055	-0.21355	1.33677	24	Other
Suclg2	0.072461	0.681206	15	0.34715	0.420639	-0.19565	0.687759	28	Other
Sun5	0.171	0.259424	15	0.25034	0.397755	0.33053	0.716721	26	Other
Sv2a	0.15813	0.300769	15	0.1536	0.500643	0.50321	0.969562	18	Other
Synj1	0.25871	0.28751	15	0.54929	0.379801	0.95262	2.34614	30	Other
Taar1	0.00081455	0.296322	15	-0.13213	1.35161	-0.11577	0.606197	23	Other
Taar3	-0.091634	0.120721	15	0.37631	0.607602	-0.61675	1.17143	22	Other
Taar5	-0.11898	0.0548122	15	0.0066591	1.07981	-0.4044	0.376203	28	Other
Taf1d	-2.5618	22.2654	15	-2.2004	4.96682	-5.8756	4.15942	15	Other
Taz	-0.11432	0.126441	15	0.061625	1.10552	0.55122	1.38536	26	Other
Tctn2	0.073315	0.0320918	15	-0.093175	0.83657	0.39032	1.02293	29	Other
Tfb1m	-0.35892	1.38369	15	-0.74117	2.77022	-1.5088	1.85505	25	Other
Tfb2m	-0.40802	3.20614	15	-0.33877	2.4251	-0.61871	0.696221	14	Other
Tmem165	-0.024017	1.75637	15	-0.33309	1.95005	-0.52759	0.58796	19	Other
Tmem217	-0.18154	0.555534	15	-0.42031	0.936742	-1.1322	2.45982	16	Other
Tmem225	0.39427	0.429971	15	0.23981	0.820764	0.44804	1.06166	30	Other
Tmem41b	-1.1363	6.09271	15	-0.55671	2.58351	-4.7827	1.74741	12	Other
Tmem87a	-0.20074	0.592728	15	-0.57373	1.07509	-0.86475	1.18647	23	Other
Tmprss11a	0.026125	0.100119	15	-0.63119	0.951791	0.45323	1.27982	14	Other
Tomm7	-0.33955	2.41444	15	-0.20018	1.12012	-0.65742	0.969846	23	Other
Tph2	0.17847	1.10552	15	0.40954	0.217398	-0.22151	0.434825	25	Other
Treml4	-0.14504	0.0619208	15	0.12133	1.24704	-0.44465	0.47423	31	None-Essential
Trhr	0.31701	0.279097	15	0.16495	1.51041	0.5741	0.856142	32	Other
Trim43a	0.20518	1.23165	15	-0.31932	0.933823	-0.11065	0.531904	24	Other
Trim67	0.33949	0.586432	15	0.24293	0.68971	0.62806	2.24811	29	Other
Triml1	0.064801	0.384576	15	0.35042	0.440512	0.16372	1.23841	28	Other
Trip12	1.285	20.2633	15	2.2751	4.07863	2.901	9.76005	42	Other
Trp53i13	0.19888	0.50307	15	0.35728	0.443589	0.43194	0.553525	33	Other
Trpc7	0.2387	0.137898	15	0.14524	0.49112	0.19906	1.0454	32	Other
Trpm7	-0.056538	0.116992	15	0.1954	1.11929	-0.54343	0.597721	24	Other
Tshb	0.078673	0.18217	15	0.34887	0.279097	0.18238	1.63153	31	Other
Tspan18	0.32613	0.222747	15	0.02838	0.56379	0.025356	2.25644	22	Other
Tspo	0.07307	0.252961	15	0.079954	0.324763	-0.23292	0.641722	24	Other
Tuba1b	-5.5864	16.6362	15	-2.9204	13.6927	-5.7465	9.86771	38	Essential
Tuft1	-0.27533	1.71095	15	0.10858	0.767894	-1.2783	2.11768	20	Other
Tulp2	0.15174	0.105939	15	0.44516	0.498229	0.70825	1.10454	28	Other
Twf2	0.062087	0.965652	15	-0.29423	1.61092	-0.23584	0.522879	28	Other
Txndc11	0.24233	1.89746	15	0.32082	0.892722	0.56877	0.709921	22	Other
Tyr	0.091287	0.122905	15	-0.0074181	0.400543	-0.31048	1.07923	34	Other
Uba6	-1.001	8.39138	15	-1.5331	8.06755	-4.9659	3.5823	21	Other
Ubb	-1.2287	6.32508	15	-0.36042	2.80305	-1.2086	2.49893	30	Other
Ube2b	-0.19336	0.698059	15	0.20828	0.581036	1.2833	1.23151	22	Other
Ube2h	-0.46206	1.93085	15	-1.0053	6.10532	-4.5292	2.56377	17	Other
Ubqln3	0.054442	0.209687	15	0.34122	0.369359	-1.8358	1.65057	17	Other
Ucn	0.0010354	0.270018	15	-0.038455	1.67664	0.47706	2.80255	31	Other
Ufc1	-0.43364	1.2274	15	0.13306	1.67586	0.35455	0.987416	39	Other
Uqcc3	0.43188	0.93968	15	0.15737	0.268049	0.4739	1.40529	38	Other
Uqcr10	-0.12027	0.141896	15	-0.42242	1.97208	-3.9264	2.55058	14	Other
Uqcrb	-0.36407	0.833215	15	-0.052814	0.403887	-0.74916	1.28233	14	Other
Uqcrc1	-0.29623	0.921978	15	-0.3724	2.19242	-1.8917	2.30213	34	Other
Uqcrfs1	-0.31914	0.261307	15	-0.6875	4.19529	-2.783	2.92908	37	Other
Uqcrh	-0.25454	0.0936596	15	-0.1551	0.945885	-0.0085635	1.54359	36	Other
Uqcrq	-0.18554	0.0259721	15	-0.19969	1.36522	-1.1653	1.57896	31	Other
Uroc1	0.22685	0.163834	15	0.65868	0.707345	0.37747	0.689902	29	Other
Usp21	0.21945	0.373567	15	0.21345	0.809304	0.50241	0.888973	31	Other
Vdr	0.078334	0.0158013	15	-0.25385	0.859712	-0.12143	1.01344	22	Other
Vegfb	0.25779	0.198178	15	0.12575	1.39185	0.31114	0.43735	30	Other
Vpreb1	-0.036244	0.945004	15	-0.2317	1.01572	-0.63299	1.39971	27	Other
Vps36	-0.31536	5.17848	15	-0.27993	2.21538	-1.7794	2.67799	22	Other
Vps37b	-0.061169	0.554692	15	0.15405	1.64581	-1.2933	2.37244	33	Other
Vps53	-1.3811	7.47881	15	0.14147	0.721201	-3.9355	4.99234	38	Other
Wasl	-0.12811	0.080331	15	-0.26214	1.34244	-0.88078	0.821656	18	Other
Wdr26	-0.38935	0.343413	15	-1.1777	5.3962	-1.9003	2.09416	19	Other
Wdr48	-0.88452	10.9849	15	-0.64537	5.16503	-3.5063	2.99238	19	Other
Wfdc9	0.065102	0.10116	15	0.51319	0.925037	-1.6747	2.52218	18	Other
Wsb1	0.16481	0.793957	15	-0.36353	2.45754	0.25676	0.450482	30	Other
Yes1	0.21675	0.409838	15	0.043992	0.702853	1.357	2.58155	32	Other
Zbtb10	0.28758	0.479621	15	-0.96767	5.85899	-5.1359	2.81118	16	Other
Zbtb22	-0.15945	1.42019	15	-0.43746	1.0791	-0.73261	0.670663	13	Other
Zbtb41	0.35929	0.0917349	15	0.147	1.2418	0.59647	1.08474	21	Other
Zdhhc5	0.078414	2.53994	15	-0.0063155	1.3668	-0.77811	1.46666	27	Other
Znrf4	0.22521	0.51807	15	0.40306	0.694026	0.31469	2.84354	32	Other
